# Supplementary material for: Design, synthesis, electrochemistry and anti-trypanosomatid hit/lead identification of nitrofuranylazines
Source: Royal Society of Chemistry journal article supplement (doi:10.1039/d3md00220a), 2023-01-01
Supplement: d3md00220a1.pdf [file d3md00220a1.pdf]

ARTICLE

**Design, synthesis, electrochemistry and  
anti-trypanosomatid hit/lead identification of  
nitrofuranylazines**

Received 00th January 20xx,  
Accepted 00th January 20xx

DOI: 10.1039/x0xx00000x

Maryna Saayman,<sup>a</sup> Christina Kannigadu,<sup>a</sup> Janine Aucamp,<sup>a</sup> Helena D. Janse van  
Rensburg,<sup>a</sup> Moegamat C. Joseph<sup>b</sup>, Andrew J. Swarts<sup>b</sup>, David D. N'Da\*

## Supplementary Information

<sup>a</sup> Centre of Excellence for Pharmaceutical Sciences, North-West University,  
Potchefstroom 2520, South Africa.

<sup>b</sup> Molecular Sciences Institute, School of Chemistry, University of the  
Witwatersrand, Johannesburg-Braamfontein 2050, South Africa.

\*Corresponding author. Tel.: +27 18 299 2256; Fax: +27 18 299 4243; E-mail  
address: David.Nda@nwu.ac.za.

Electronic Supplementary Information (ESI) available: [details of any  
supplementary information available should be included here]. See  
DOI: 10.1039/x0xx00000x

## APPENDIX A: CHEMICAL CHARACTERIZATION

*(E)*-Benzylidenehydrazine (1) $^1\text{H}$  NMR in DMSO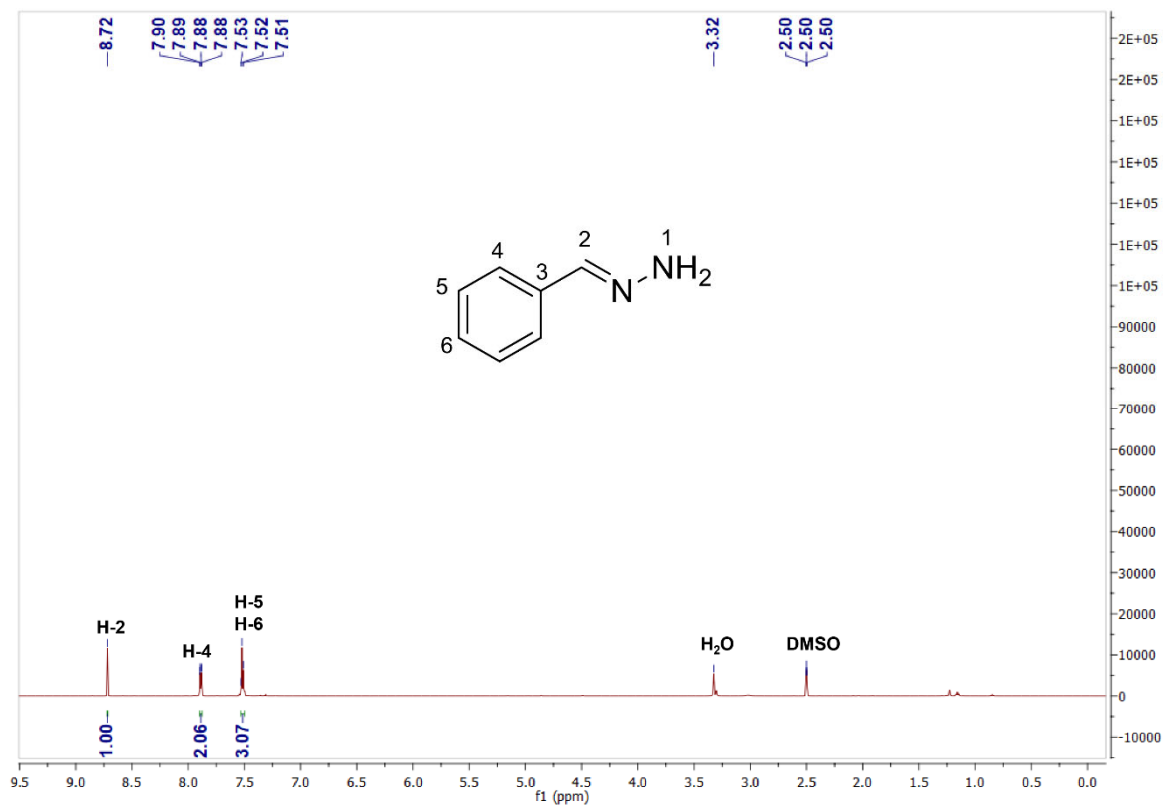 $^{13}\text{C}$  NMR in DMSO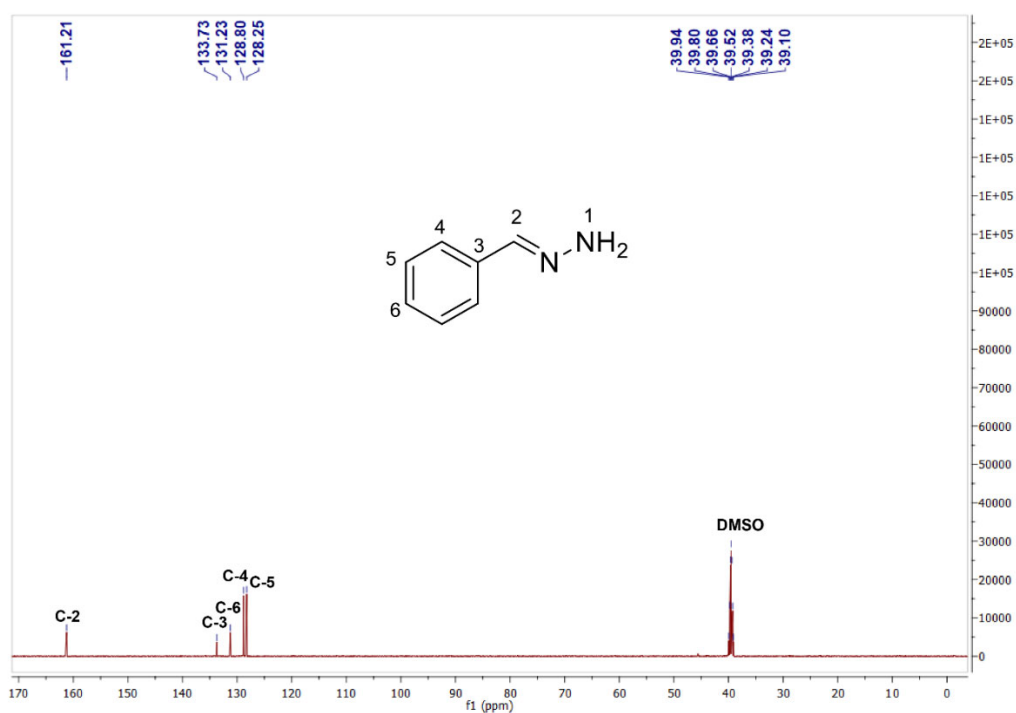

## IR Spectrum

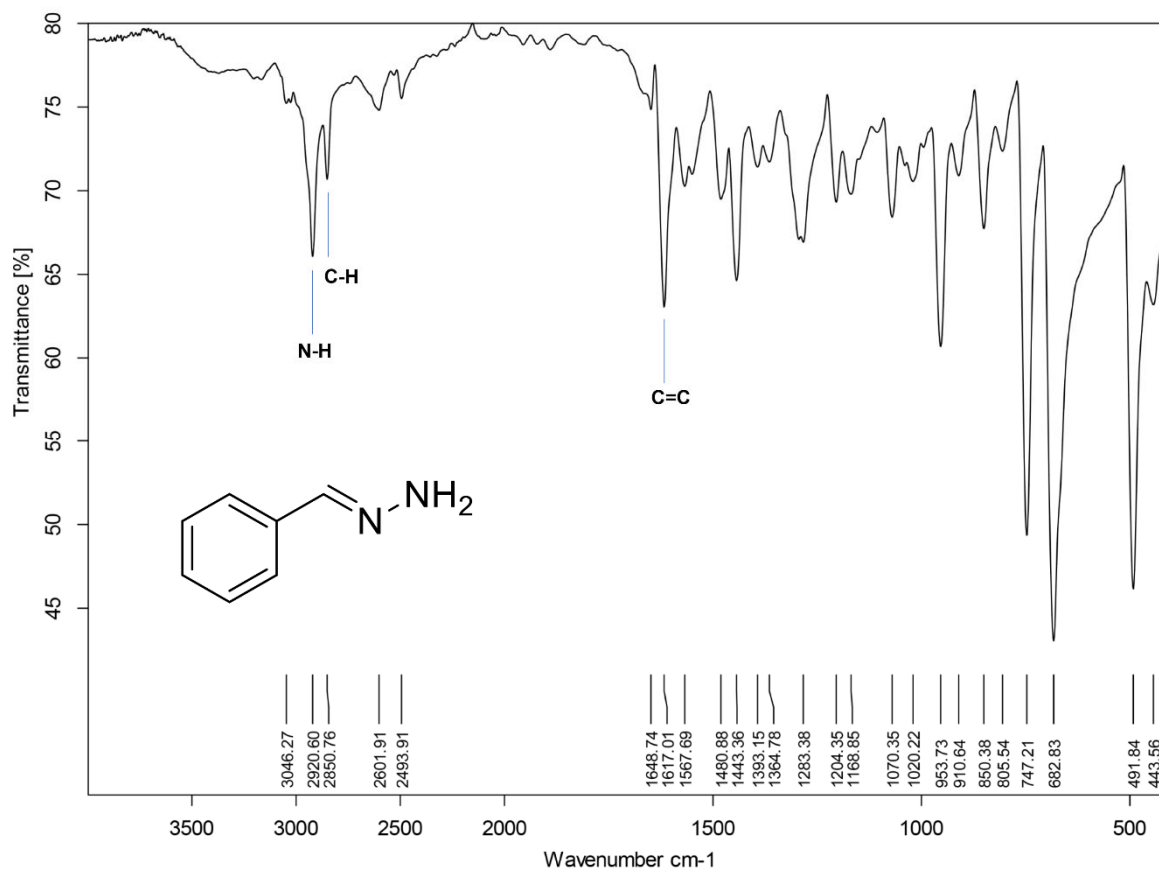

Dark yellow powder; yield: 565 mg (47%); mp 88-90 °C; IR  $\nu_{\text{max}}$  ( $\text{cm}^{-1}$ ): 2921 (N-H), 2851 (C-H), 1649 (C=C);  $^1\text{H}$  NMR (600 MHz, DMSO)  $\delta$  8.72 (s, 1H, H-2), 8.89 (dd,  $J$  = 7.6, 1.8 Hz, 2H, H-4), 7.53 (dd,  $J$  = 13.1, 5.8 Hz, 3H, H-5/6), 6.62 (s, 2H, H-1).  $^{13}\text{C}$  NMR (151 MHz, DMSO)  $\delta$  161.21 (C-2), 133.73 (C-3), 131.23 (C-6), 128.80 (C-4), 128.25 (C-5).

**(E)-(4-Fluorobenzylidene)hydrazine (2)****<sup>1</sup>H NMR in DMSO**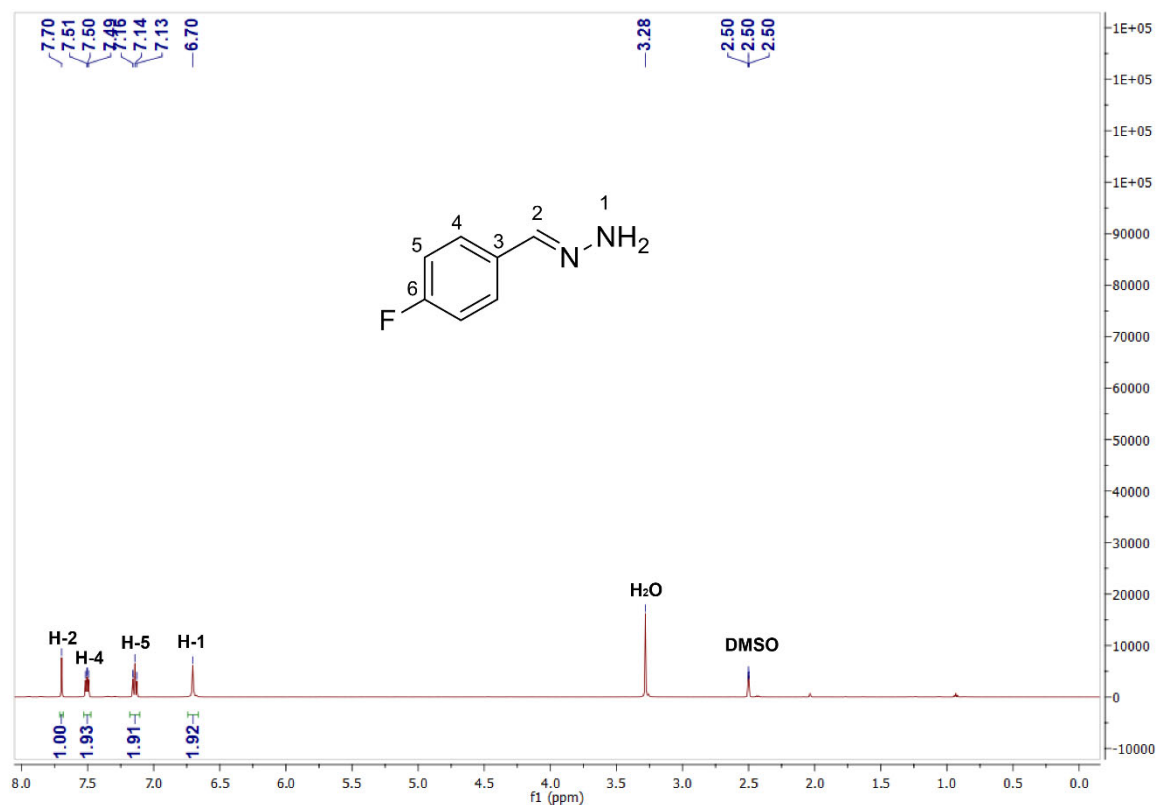**<sup>13</sup>C NMR in DMSO**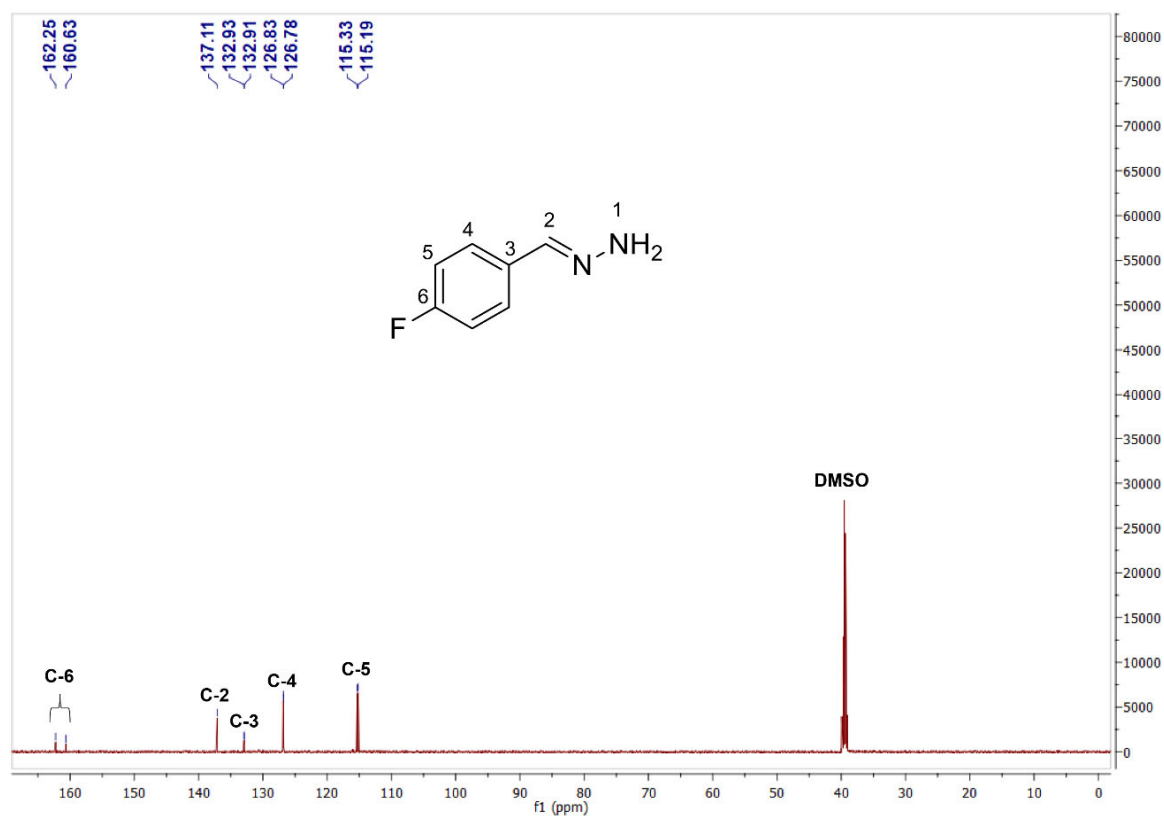

## IR Spectrum

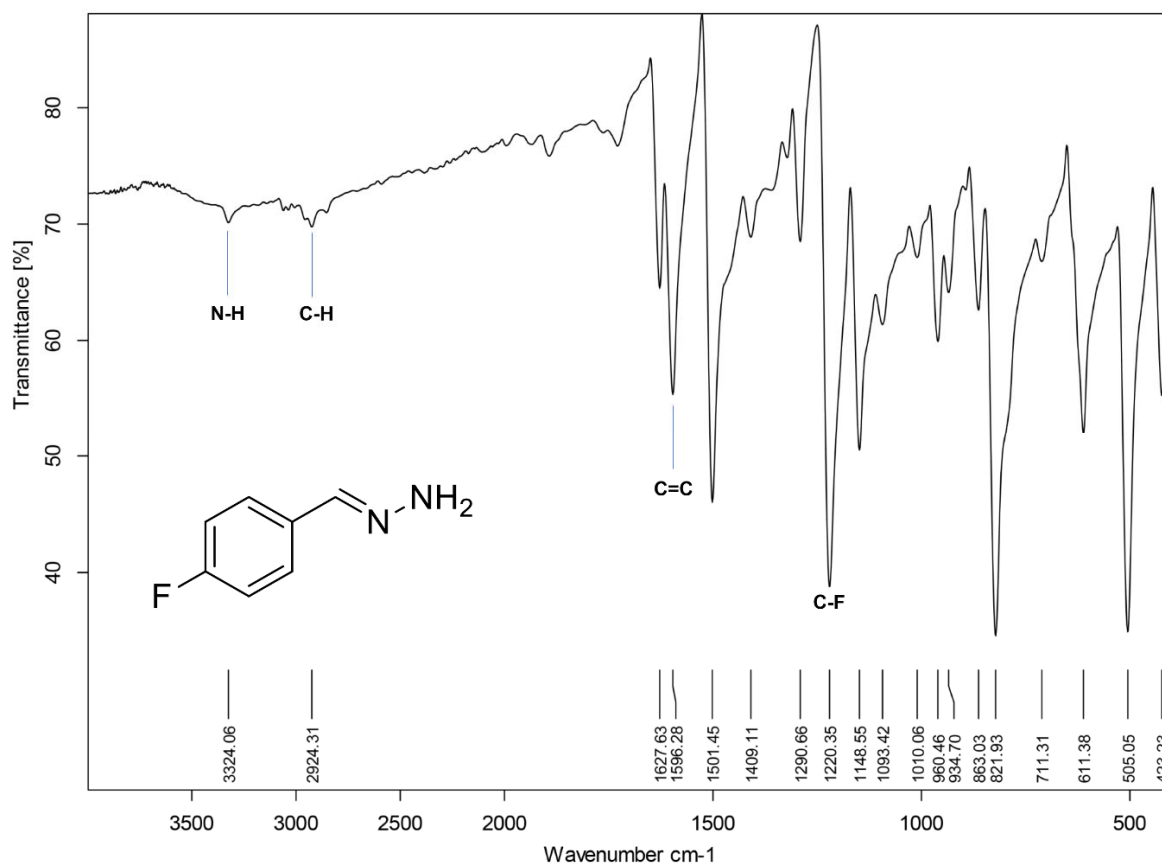

Light yellow powder; yield: 857 mg (62%); mp 181-183 °C; IR  $\nu_{\text{max}}$  (cm<sup>-1</sup>): 3324 (N-H), 2924 (C-H), 1596 (C=C), 1220 (C-F); <sup>1</sup>H NMR (600 MHz, DMSO)  $\delta$  7.70 (s, 1H, H-2), 7.50 (dd,  $J_{\text{H-F}} = 8.6, 5.8$  Hz, 2H, H-4), 7.14 (t,  $J_{\text{H-F}} = 8.6$  Hz, 2H, H-5), 6.70 (s, 2H, H-1). <sup>13</sup>C NMR (151 MHz, DMSO)  $\delta$  161.44 (d,  $^1J_{\text{C-F}} = 244.0$  Hz, C-6), 137.11 (C-2), 132.92 (d,  $^2J_{\text{C-F}} = 3.0$  Hz, C-3), 126.81 (d,  $^3J_{\text{C-F}} = 8.0$  Hz, C-4), 115.26 (d,  $^4J_{\text{C-F}} = 21.7$  Hz, C-5).

**(E)-(4-Chlorobenzylidene)hydrazine (3)****<sup>1</sup>H NMR in DMSO**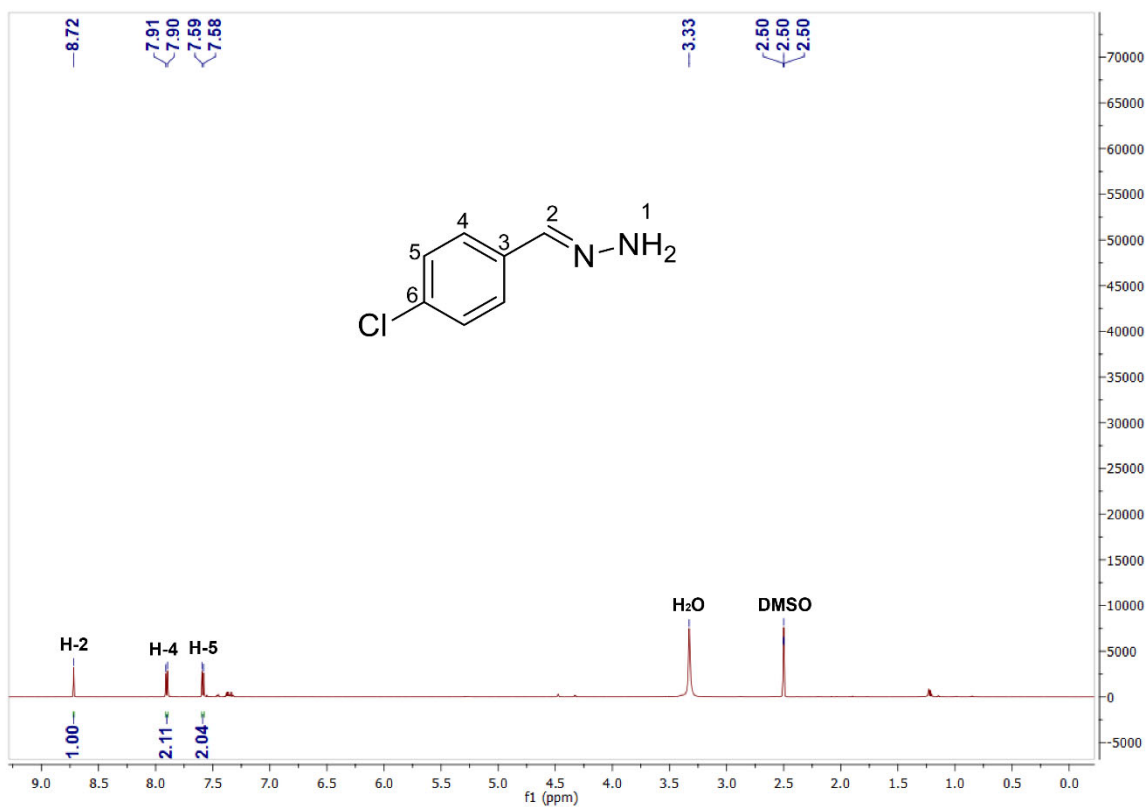**<sup>13</sup>C NMR in DMSO**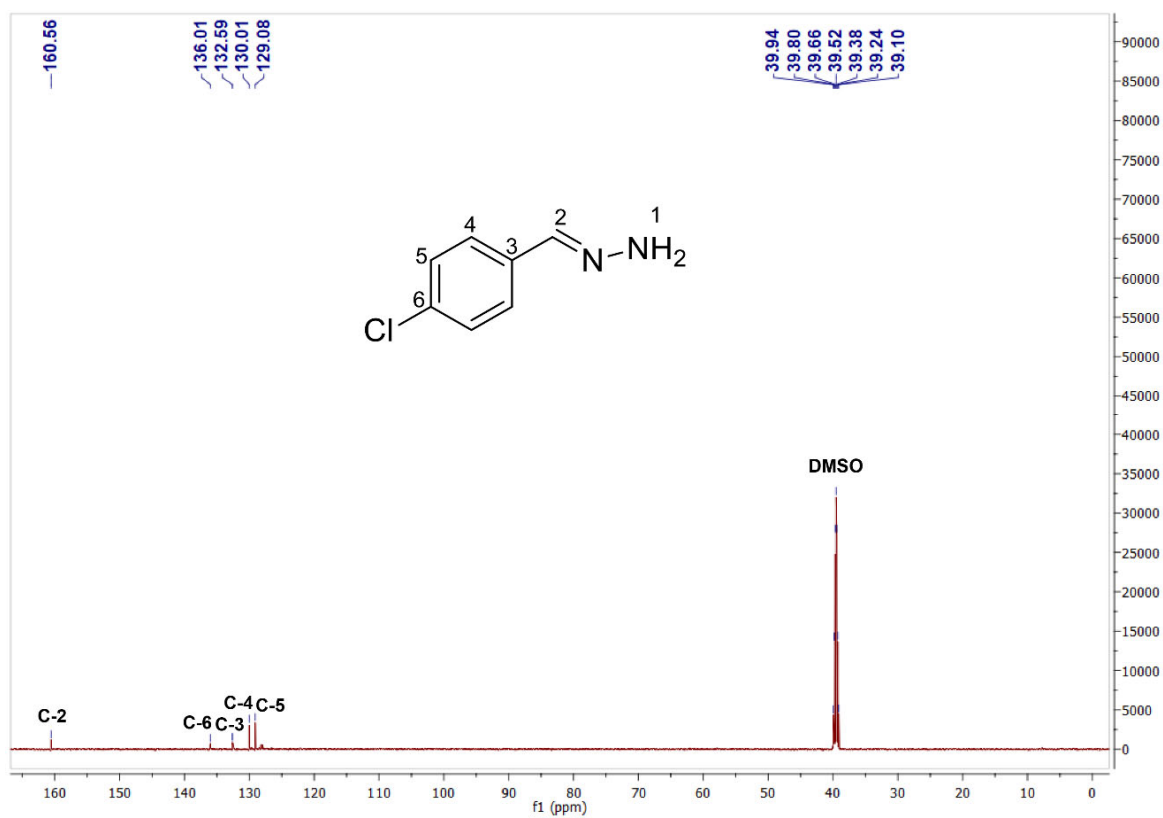

## IR Spectrum

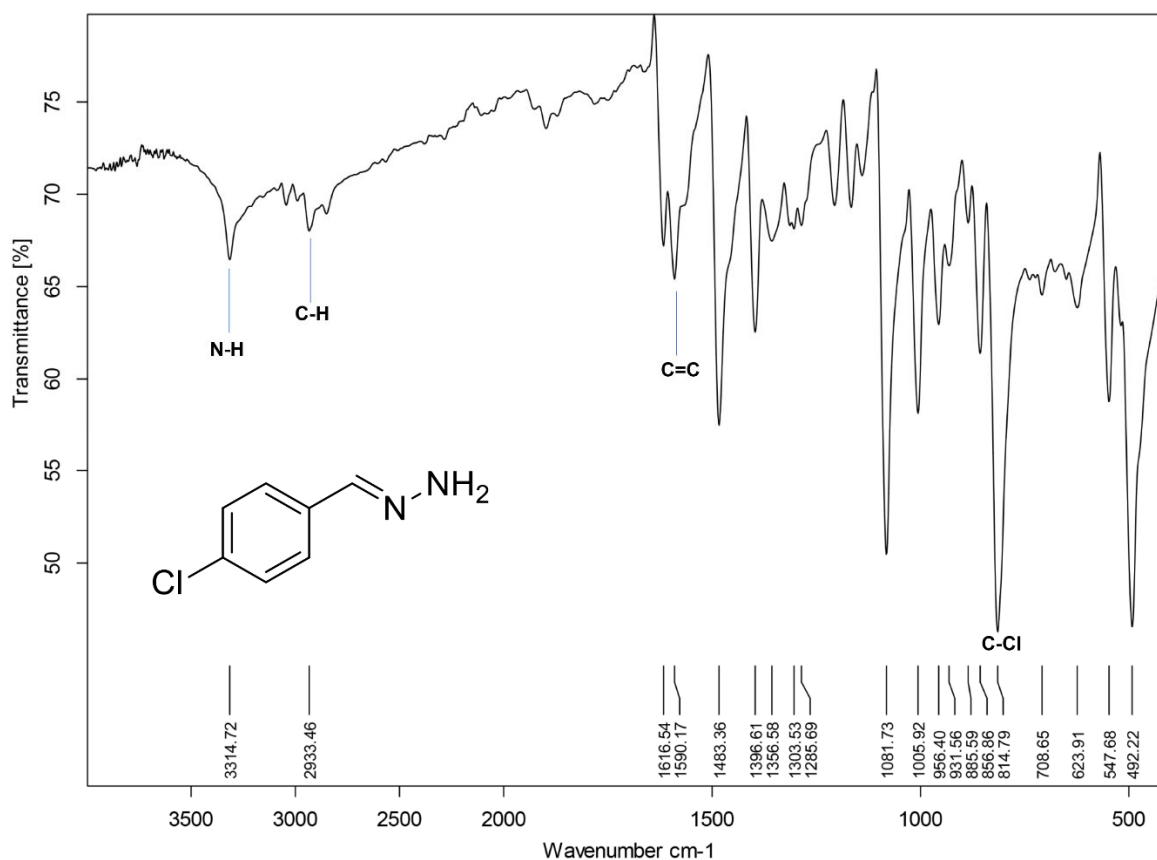

Yellow powder; yield: 1.0 g (65%); mp 196-198 °C; IR  $\nu_{\max}$  (cm<sup>-1</sup>): 3315 (N-H), 2933 (C-H), 1590 (C=C), 815 (C-Cl); <sup>1</sup>H NMR (600 MHz, DMSO)  $\delta$  8.72 (s, 1H, H-2), 7.90 (d,  $J$  = 8.5 Hz, 2H, H-4), 7.59 (d,  $J$  = 8.5 Hz, 2H, H-5), 6.62 (s, 2H, H-1). <sup>13</sup>C NMR (151 MHz, DMSO)  $\delta$  160.56 (C-2), 136.01 (C-6), 132.59 (C-3), 130.01 (C-4), 129.08 (C-5).

**(E)-(4-Bromobenzylidene)hydrazine (4)****<sup>1</sup>H NMR in DMSO**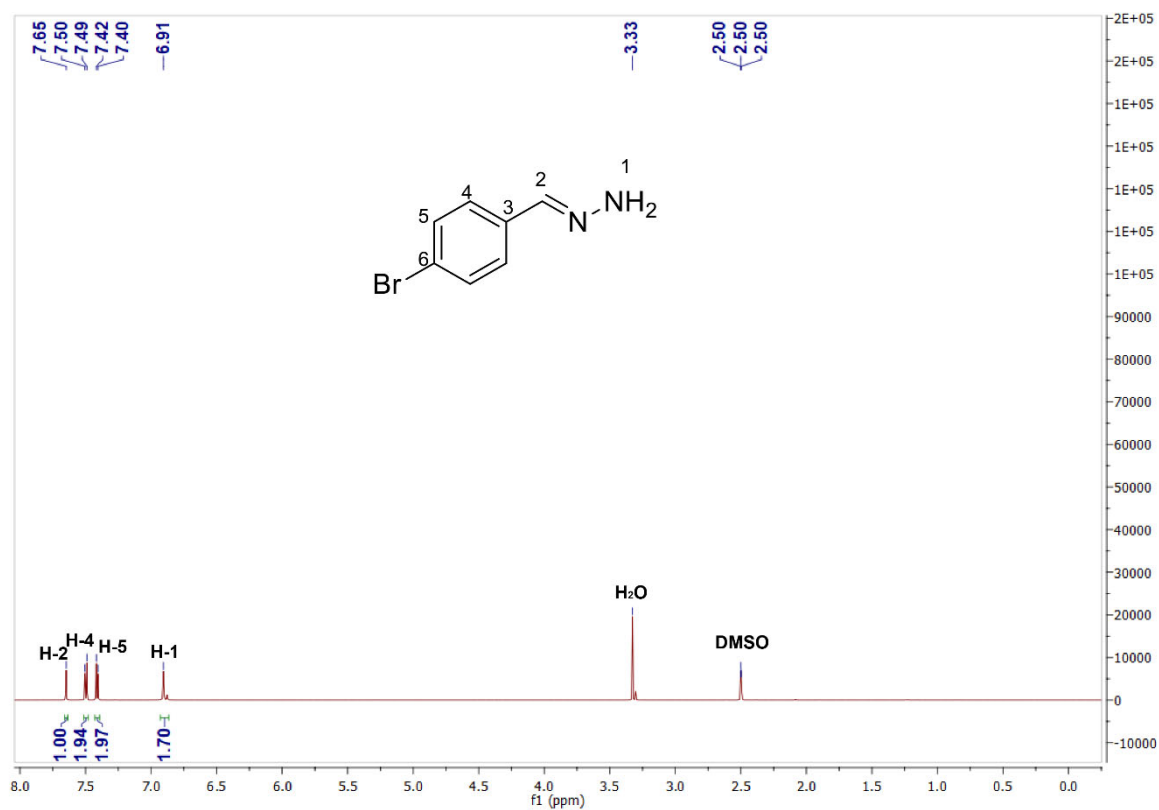**<sup>13</sup>C NMR in DMSO**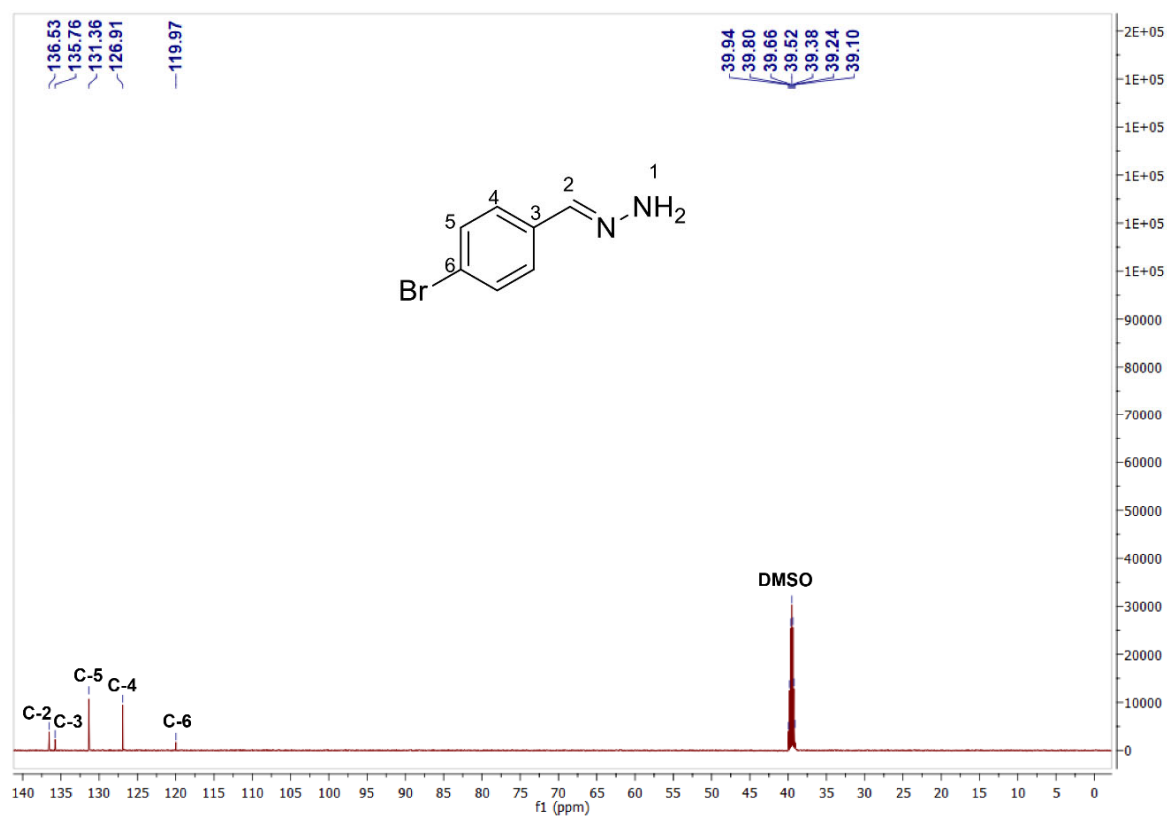



## IR Spectrum

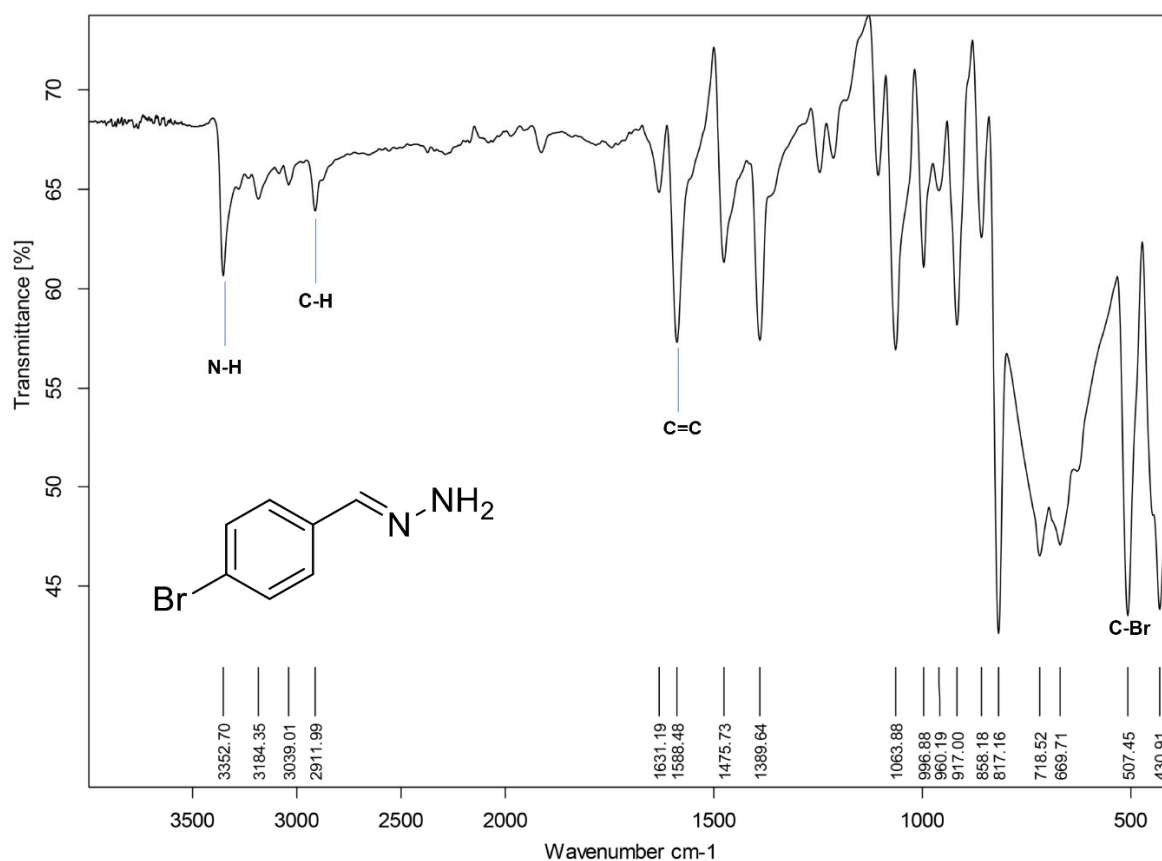

White crystal-like powder; yield: 1.2 g (61%); mp 72-74 °C; IR  $\nu_{\text{max}}$  ( $\text{cm}^{-1}$ ): 3353 (N-H), 2912 (C-H), 1588 (C=C), 507 (C-Br);  $^1\text{H}$  NMR (600 MHz, DMSO)  $\delta$  7.65 (s, 1H, H-2), 7.50 (d,  $J$  = 8.5 Hz, 2H, H-4), 7.41 (d,  $J$  = 8.5 Hz, 2H, H-5), 6.91 (s, 2H, H-1).  $^{13}\text{C}$  NMR (151 MHz, DMSO)  $\delta$  136.53 (C-2), 135.76 (C-3), 131.36 (C-5), 126.91 (C-4), 119.97 (C-6).

**(E)-(4-Methylbenzylidene)hydrazine (5)****<sup>1</sup>H NMR in DMSO**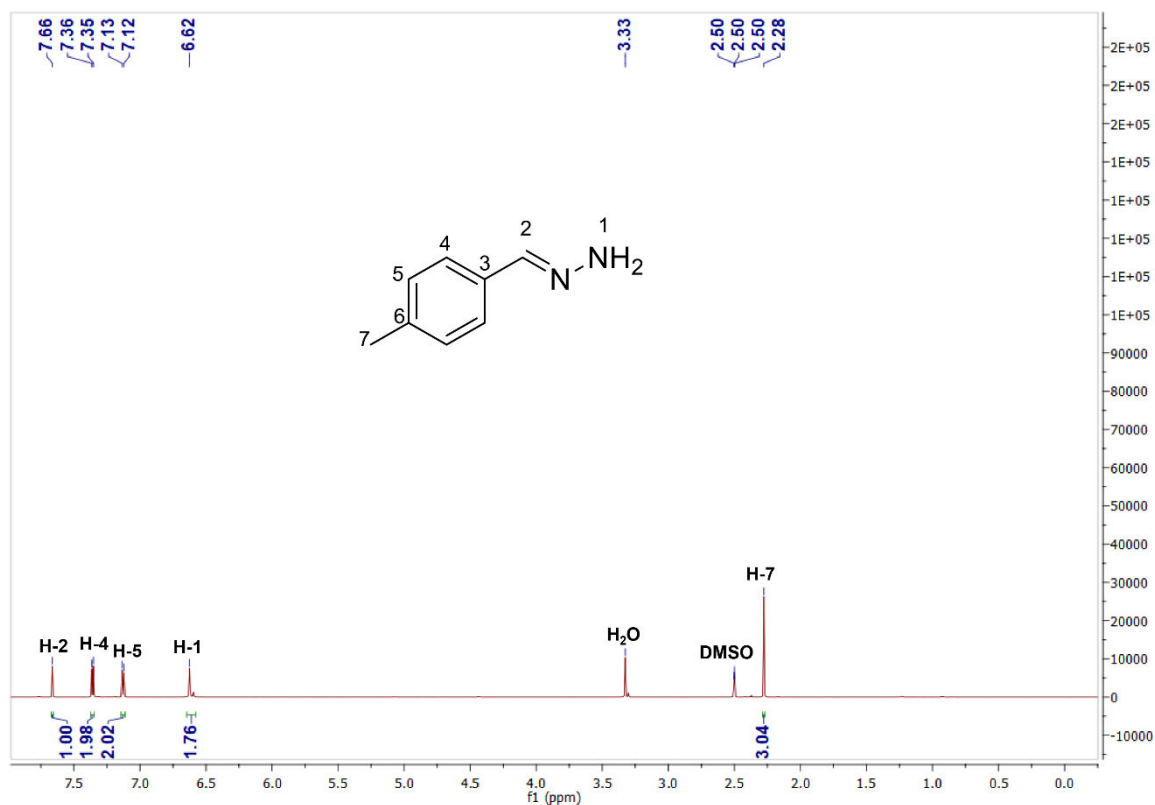**<sup>13</sup>C NMR in DMSO**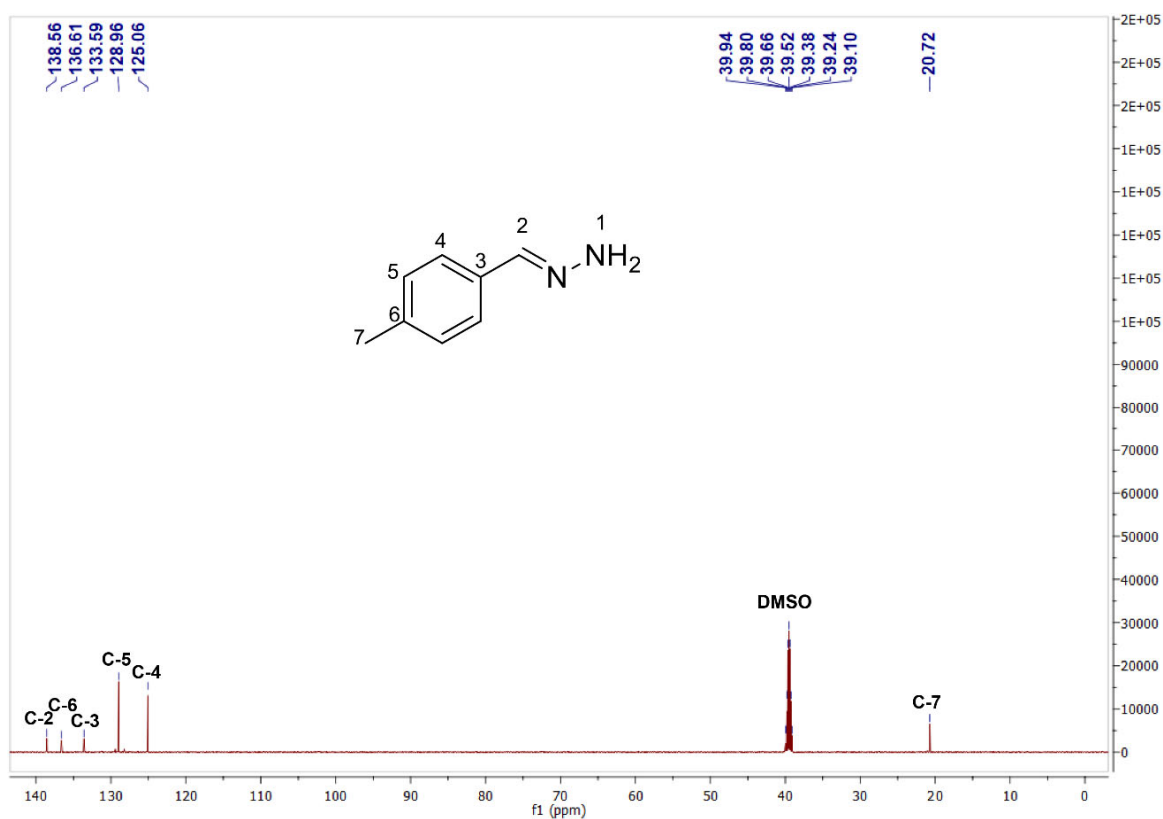

## IR Spectrum

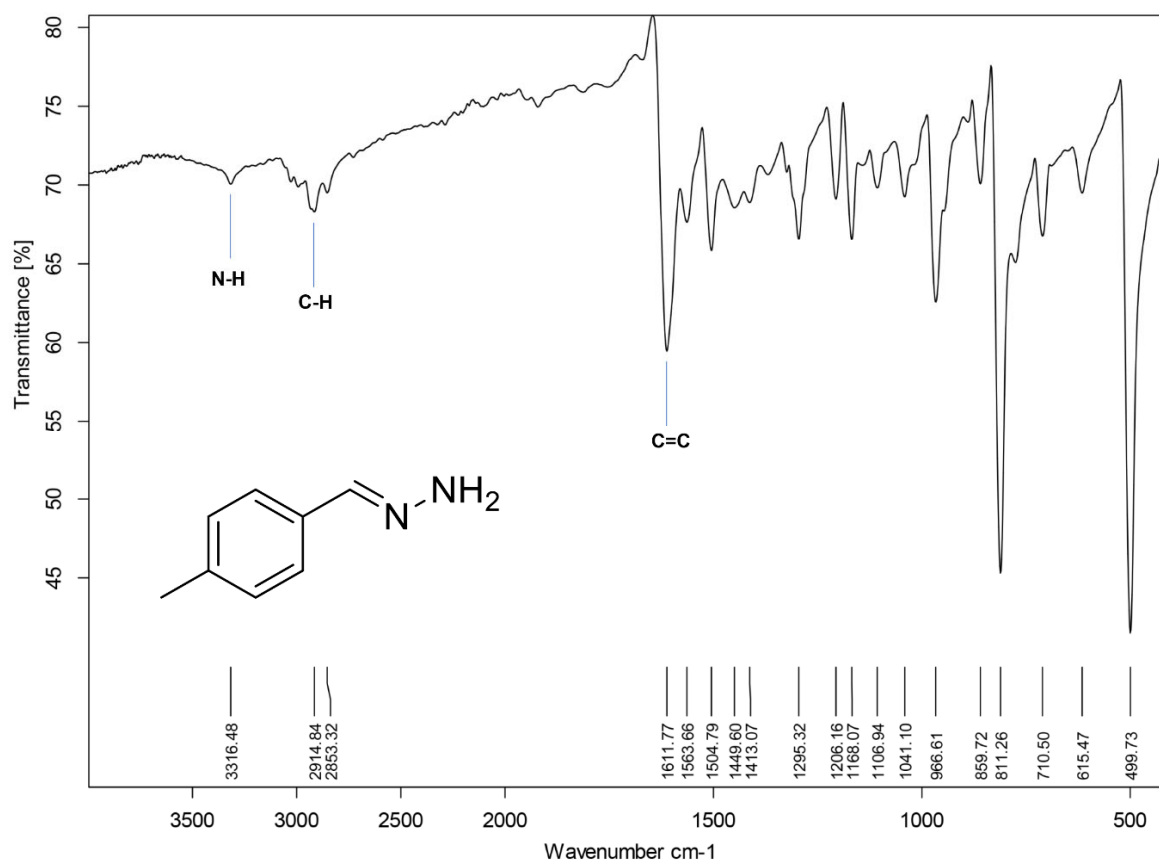

Yellow powder; yield: 1.14 g (85%); mp 150-152 °C; IR  $\nu_{\text{max}}$  (cm<sup>-1</sup>): 3316 (N-H), 2915 (C-H), 1612 (C=C); <sup>1</sup>H NMR (600 MHz, DMSO)  $\delta$  7.66 (s, 1H, H-2), 7.36 (d,  $J$  = 8.0 Hz, 2H, H-4), 7.13 (d,  $J$  = 8.0 Hz, 2H, H-5), 6.62 (s, 2H, H-1), 2.28 (s, 3H, H-7). <sup>13</sup>C NMR (151 MHz, DMSO)  $\delta$  138.56 (C-2), 136.61 (C-6), 133.59 (C-3), 128.96 (C-5), 125.06 (C-4), 20.72 (C-7).

**(E)-(4-Methoxybenzylidene)hydrazine (6)****<sup>1</sup>H NMR in DMSO**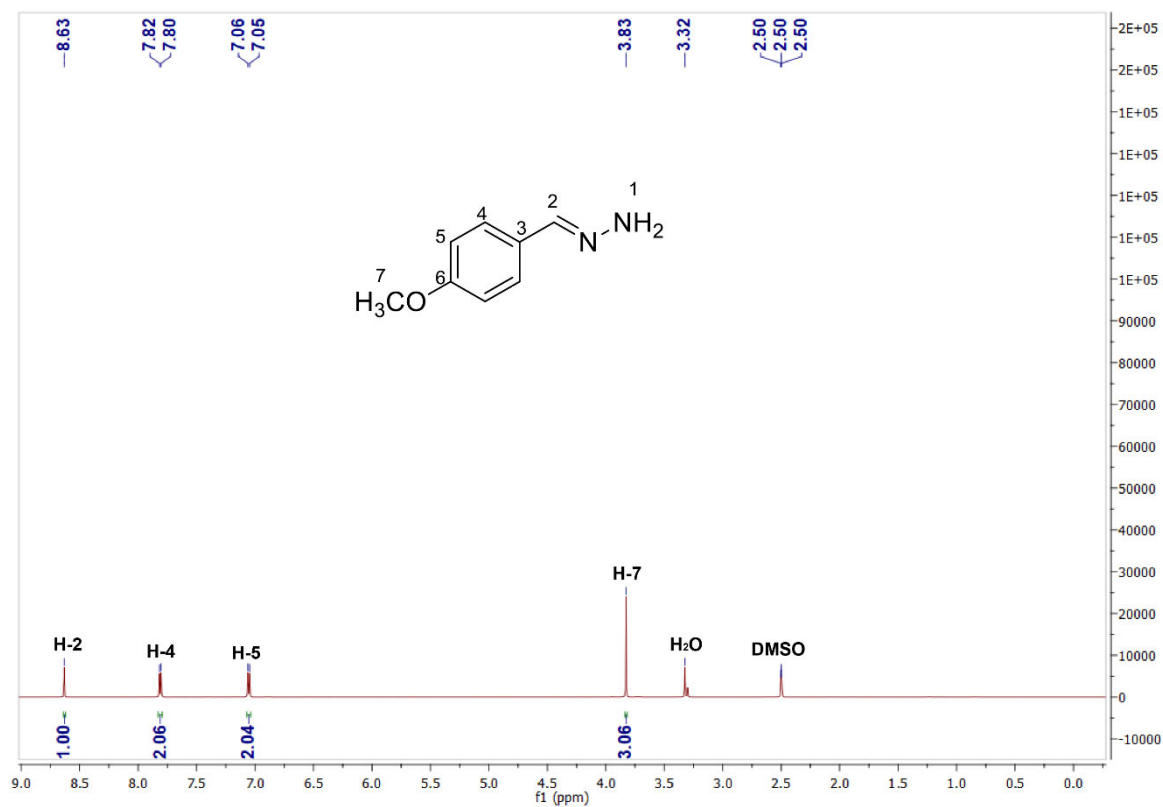**<sup>13</sup>C NMR in DMSO**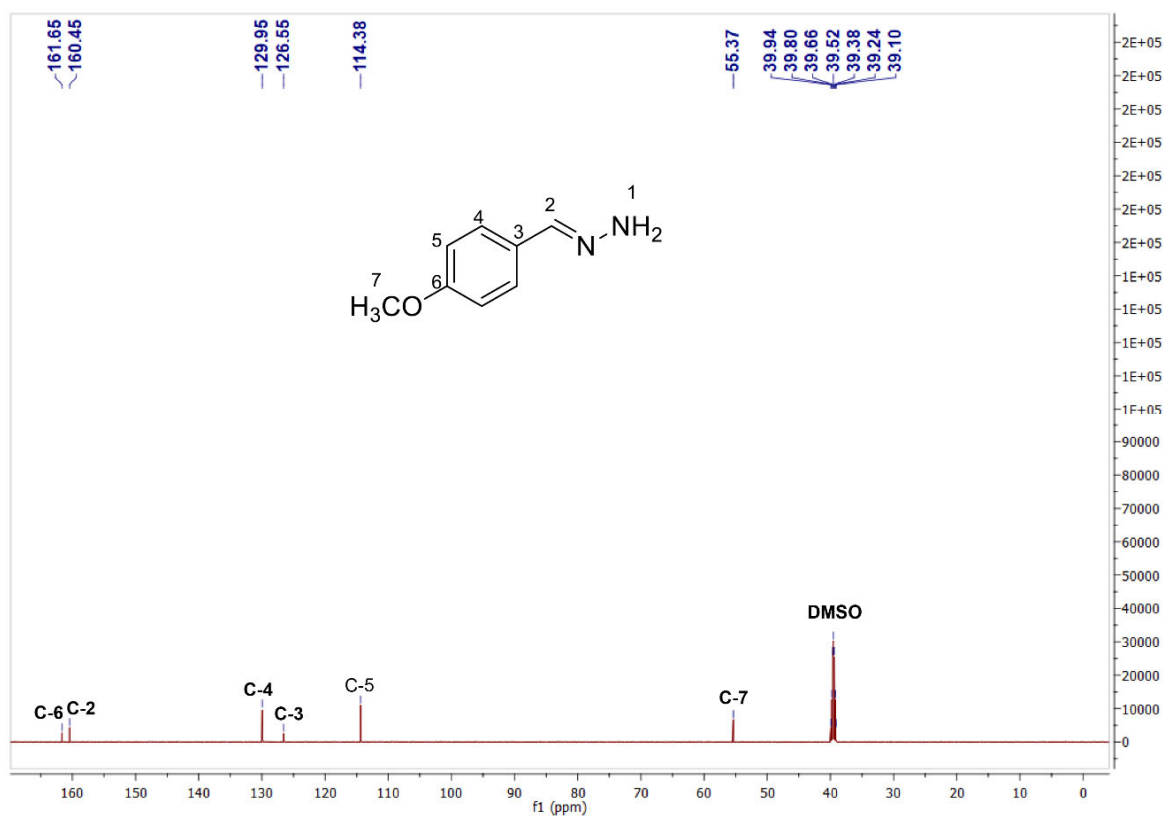

## IR Spectrum

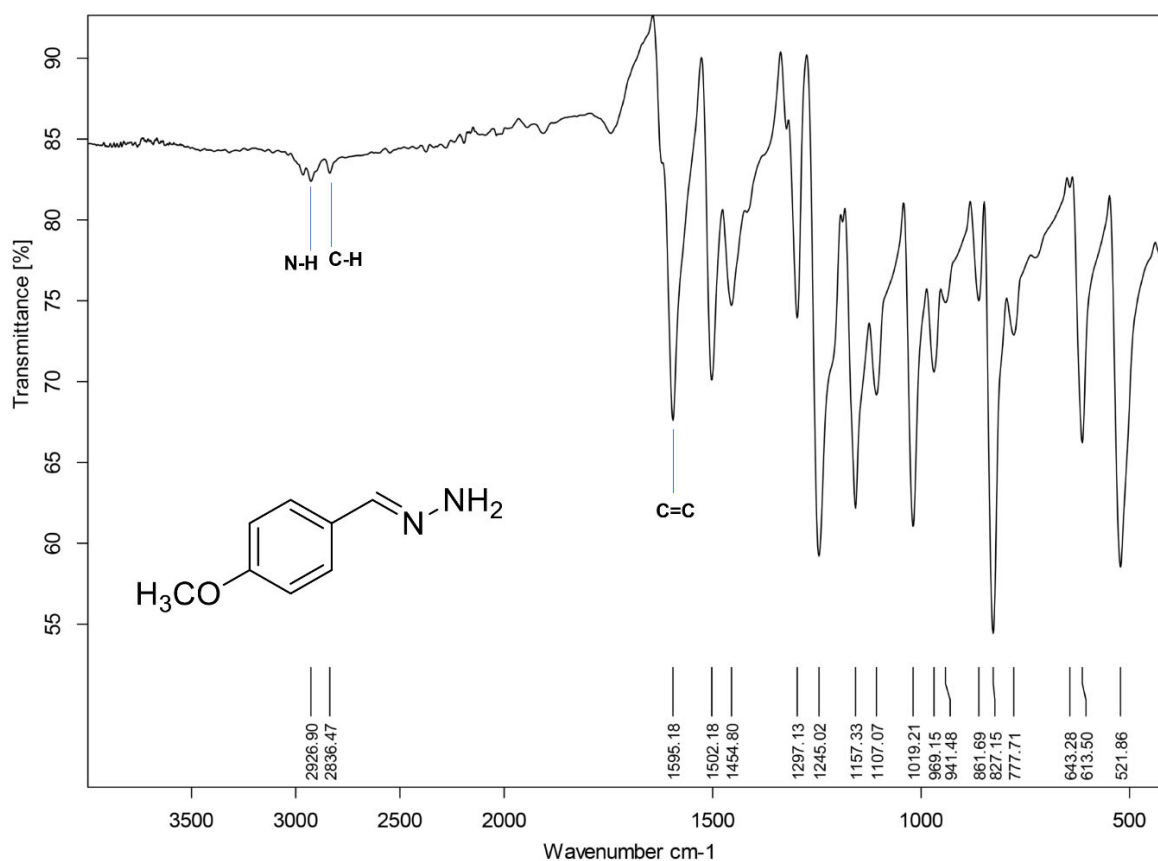

Light yellow powder; yield: 1.0 g (67%); mp 170-172 °C; IR  $\nu_{\max}$  (cm<sup>-1</sup>): 2927 (N-H), 2836 (C-H), 1595 (C=C); <sup>1</sup>H NMR (600 MHz, DMSO)  $\delta$  8.63 (s, 1H, H-2), 7.81 (d,  $J$  = 8.7 Hz, 2H, H-4), 7.05 (d,  $J$  = 8.7 Hz, 2H, H-5), 6.62 (s, 2H, H-1), 3.83 (s, 3H, H-7). <sup>13</sup>C NMR (151 MHz, DMSO)  $\delta$  161.65 (C-6), 160.45 (C-2), 129.95 (C-4), 126.55 (C-3), 114.38 (C-5), 55.37 (C-7).

**(E)-(4-(Benzyloxy)benzylidene)hydrazine (7)****<sup>1</sup>H NMR in DMSO**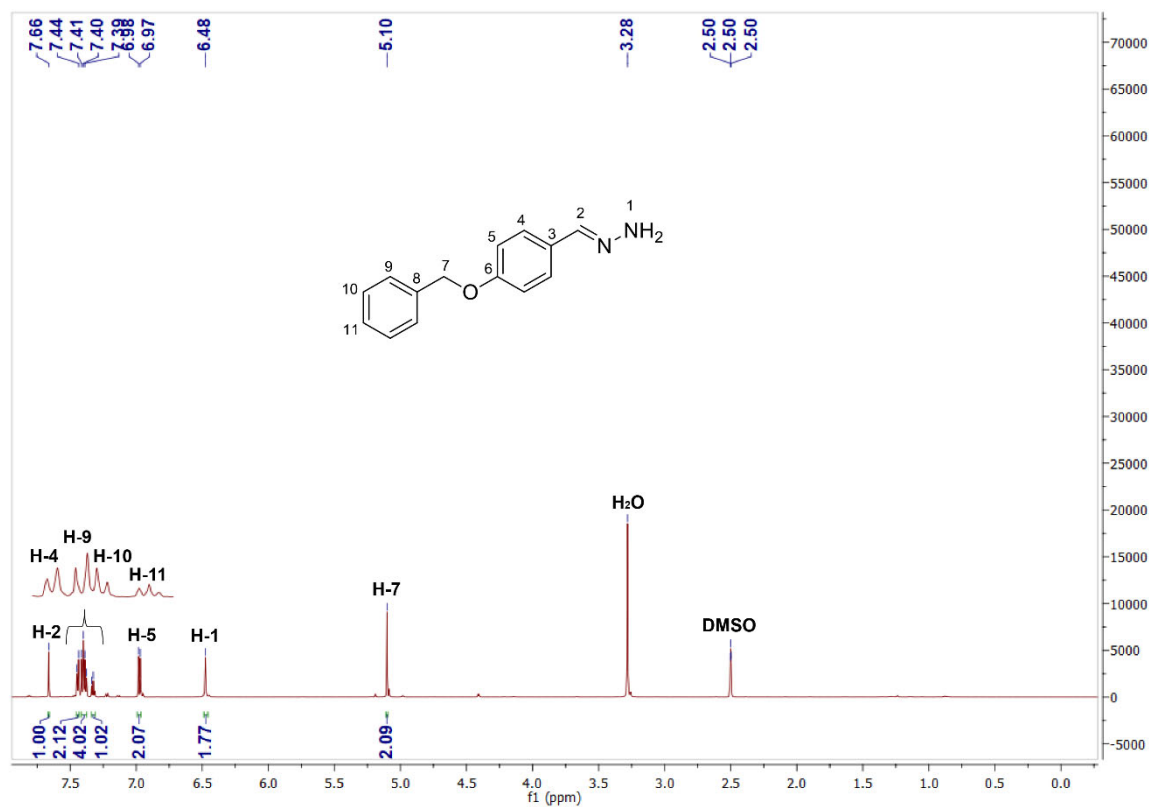**<sup>13</sup>C NMR in DMSO**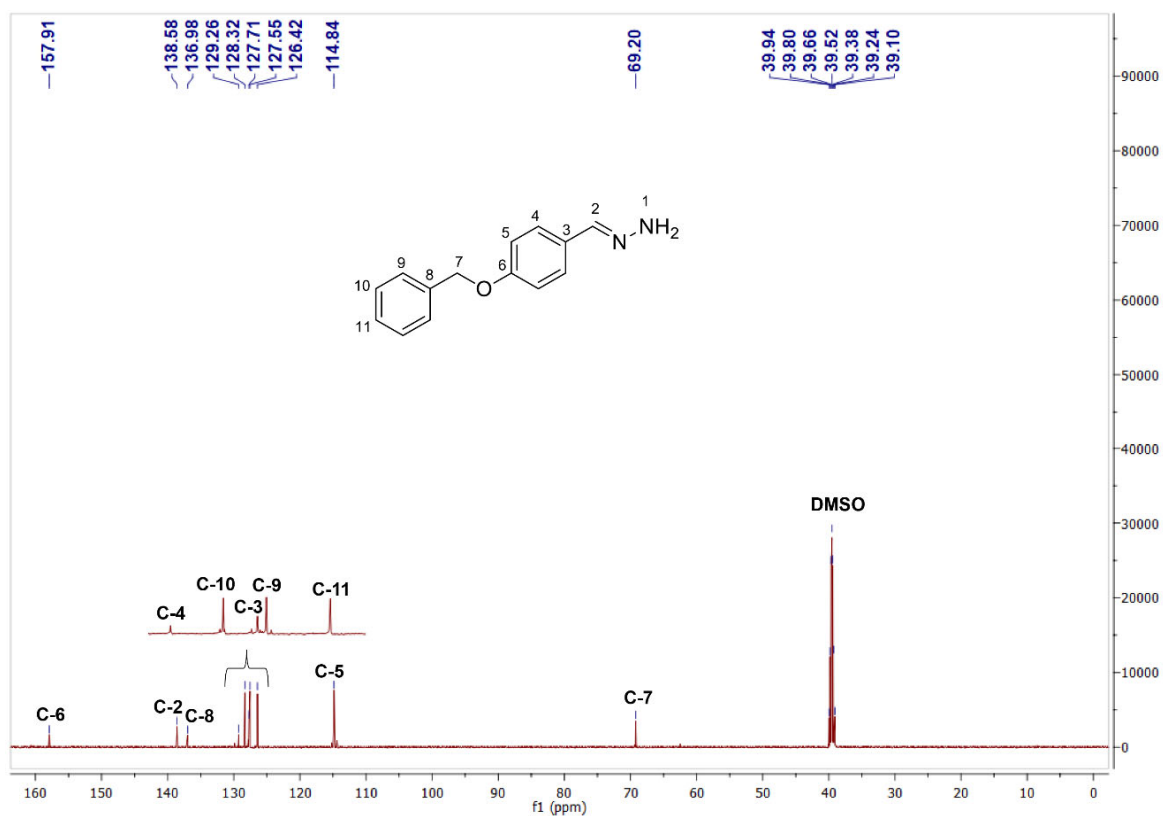

## IR Spectrum

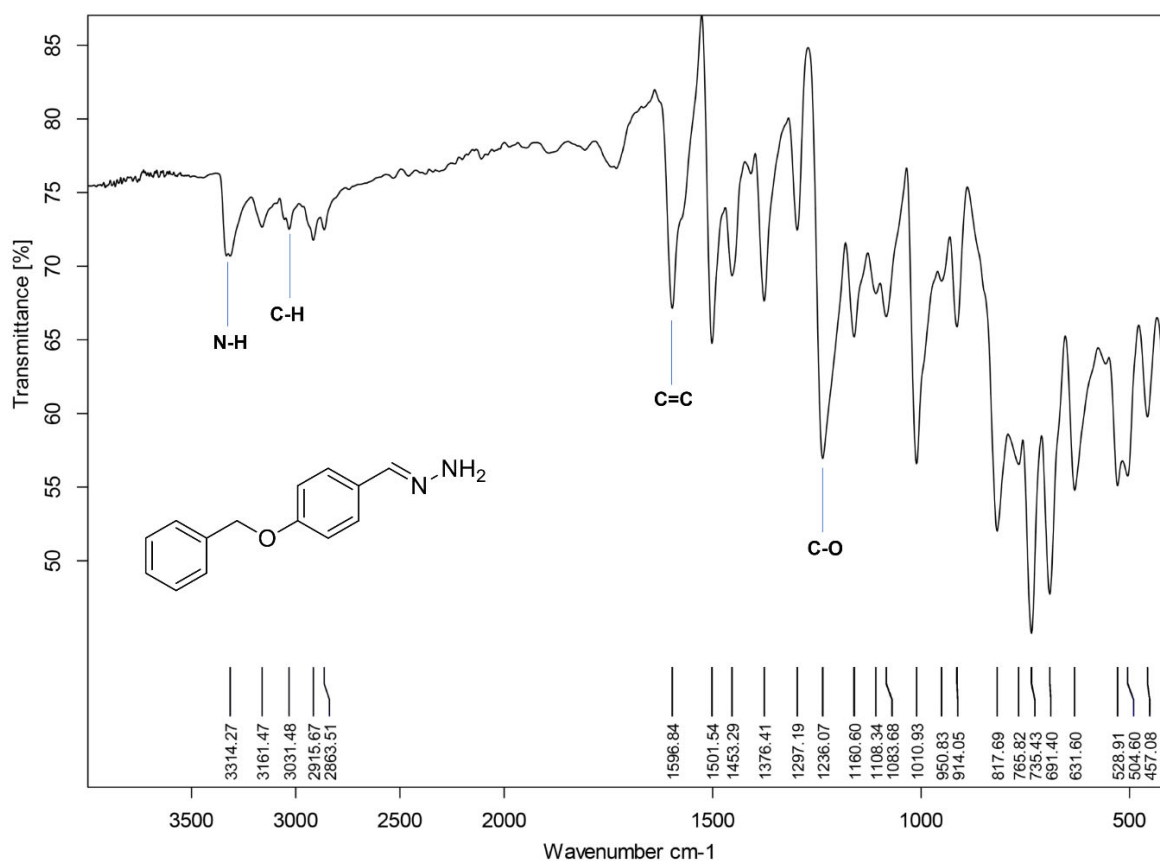

White powder; yield: 1.9 g (84%); mp.125-127 °C; IR  $\nu_{\max}$  (cm<sup>-1</sup>): 3314 (N-H), 3031 (C-H), 1597 (C=C), 1236 (C-O); <sup>1</sup>H NMR (600 MHz, DMSO)  $\delta$  7.66 (s, 1H, H-2), 7.44 (d,  $J$  = 8.7 Hz, 2H, H-4), 7.41 (d,  $J$  = 8.5 Hz, 2H, H-9), 7.38 (d,  $J$  = 8.5 Hz, 2H, H-10), 7.32 (t,  $J$  = 7.3 Hz, 1H, H-11), 6.98 (d,  $J$  = 8.7 Hz, 2H, H-5), 6.48 (s, 2H, H-1), 5.10 (s, 2H, H-7). <sup>13</sup>C NMR (151 MHz, DMSO)  $\delta$  157.91 (C-6), 138.58 (C-2), 136.98 (C-8), 129.26 (C-4), 128.32 (C-10), 127.71 (C-3), 127.55 (C-9), 126.42 (C-11), 114.84 (C-5), 69.20 (C-7).

**(E)-4-(Hydrazonomethyl)phenol (8)****<sup>1</sup>H NMR in DMSO**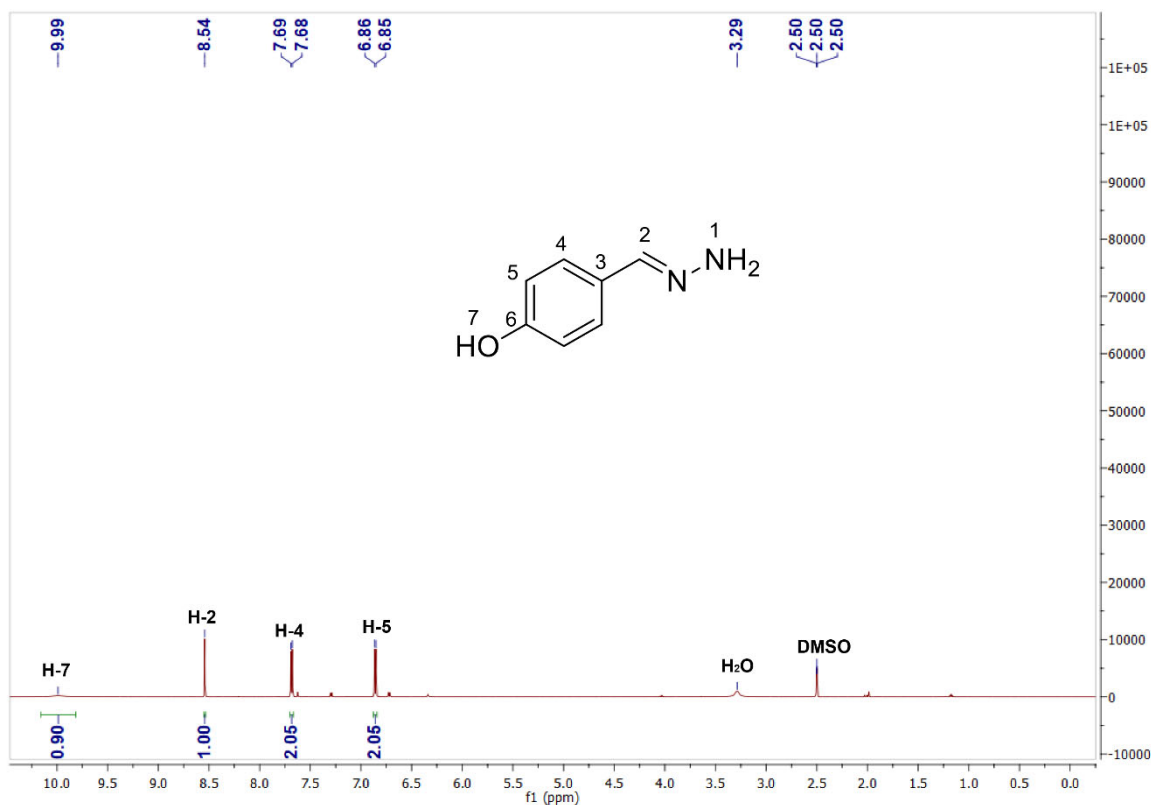**<sup>13</sup>C NMR in DMSO**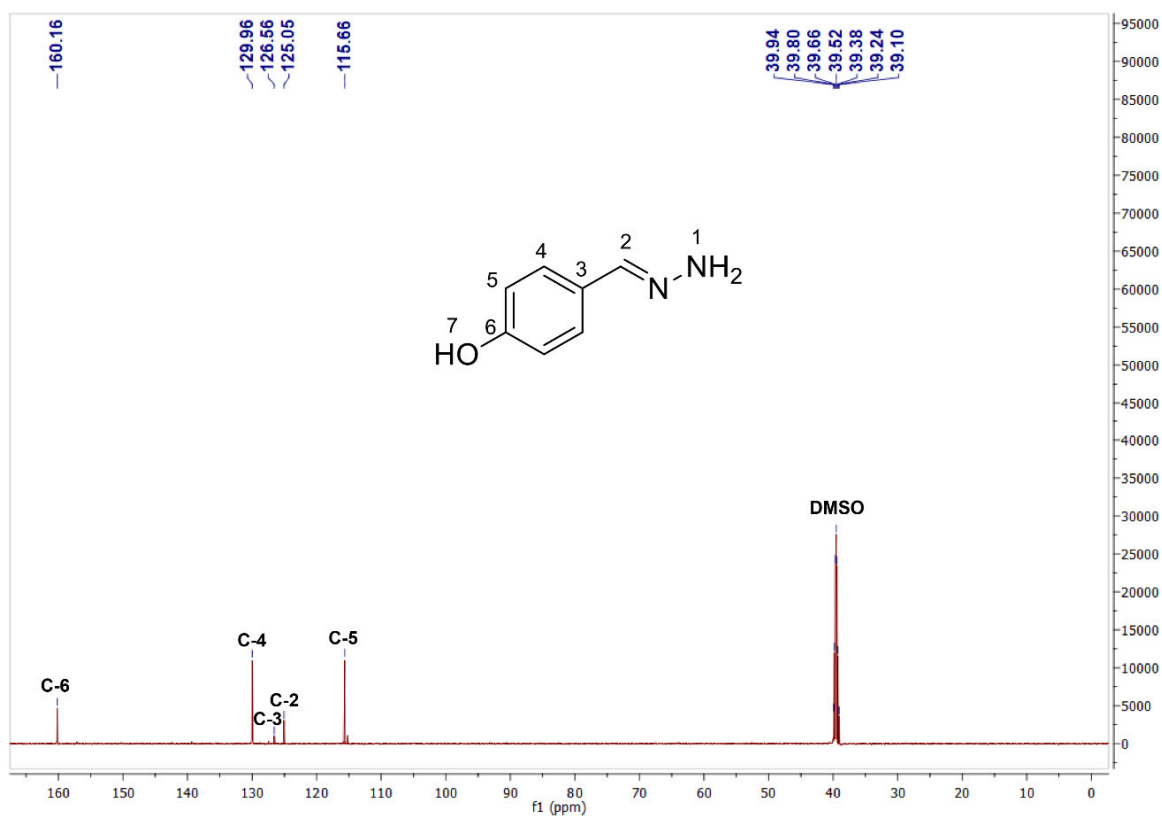



## IR Spectrum

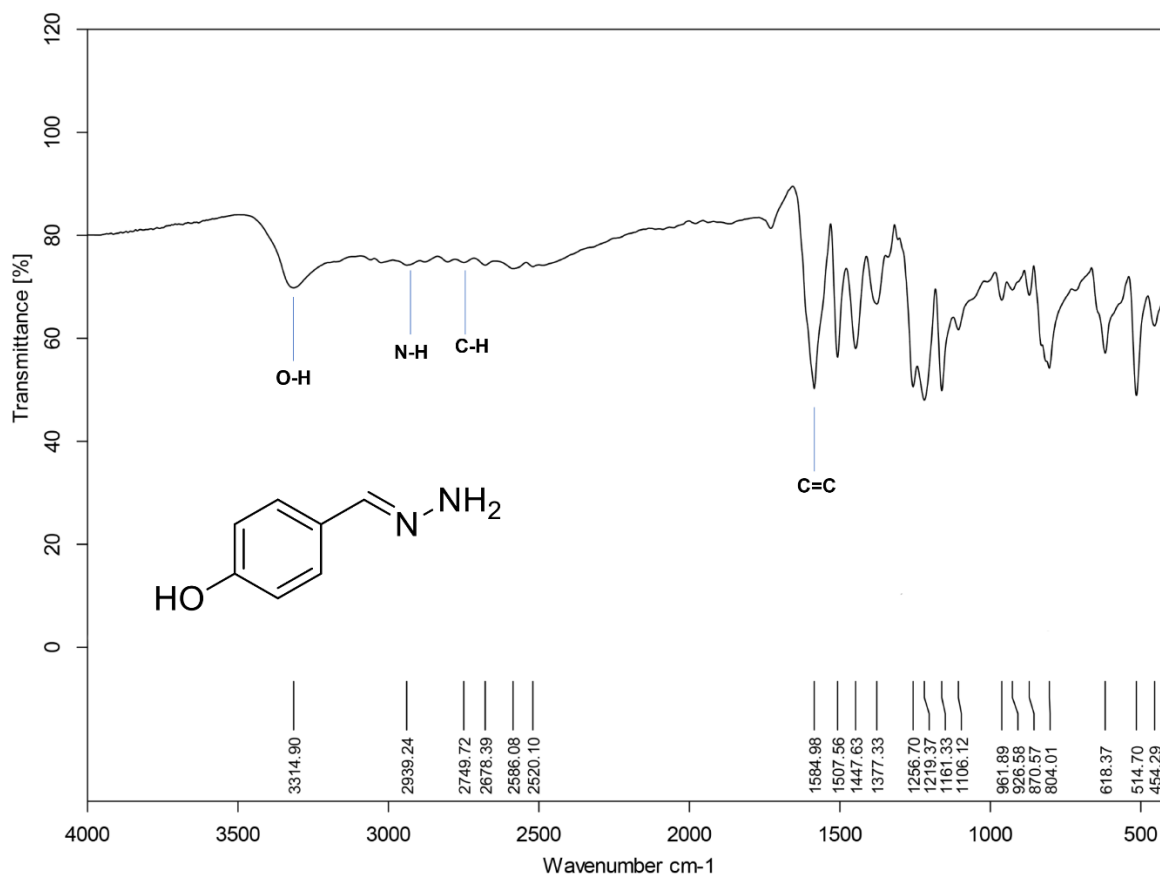

Yellow powder; yield: 967 mg (71%); mp 275-277 °C; IR  $\nu_{\text{max}}$  (cm<sup>-1</sup>): 3315 (O-H), 2939 (N-H), 2750 (C-H), 1585 (C=C); <sup>1</sup>H NMR (600 MHz, DMSO)  $\delta$  9.99 (s, 1H, H-7), 8.54 (s, 1H, H-2), 7.68 (d,  $J$  = 8.5 Hz, 2H, H-4), 6.86 (d,  $J$  = 8.5 Hz, 2H, H-5), 6.62 (s, 2H, H-1). <sup>13</sup>C NMR (151 MHz, DMSO)  $\delta$  160.16 (C-6), 129.96 (C-4), 126.56 (C-3), 125.05 (C-2), 115.66 (C-5).

**(E)-(4-Nitrobenzylidene)hydrazine (9)****<sup>1</sup>H NMR in DMSO**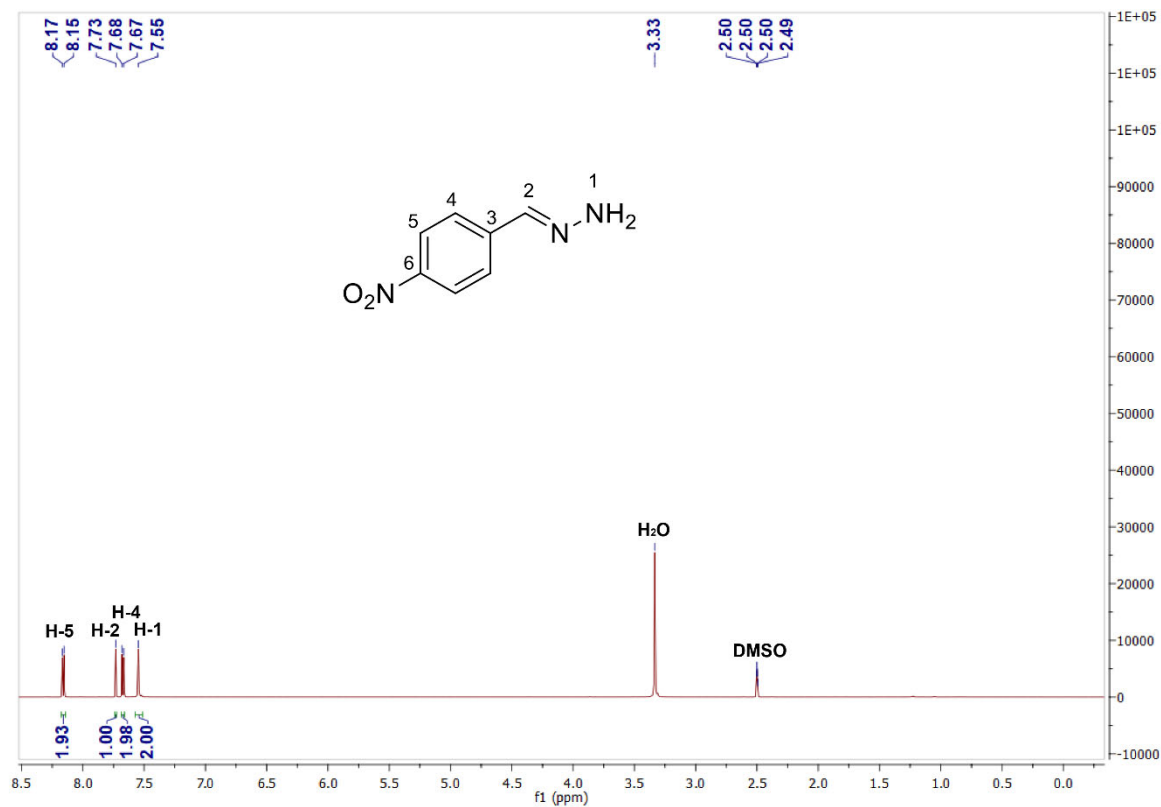**<sup>13</sup>C NMR in DMSO**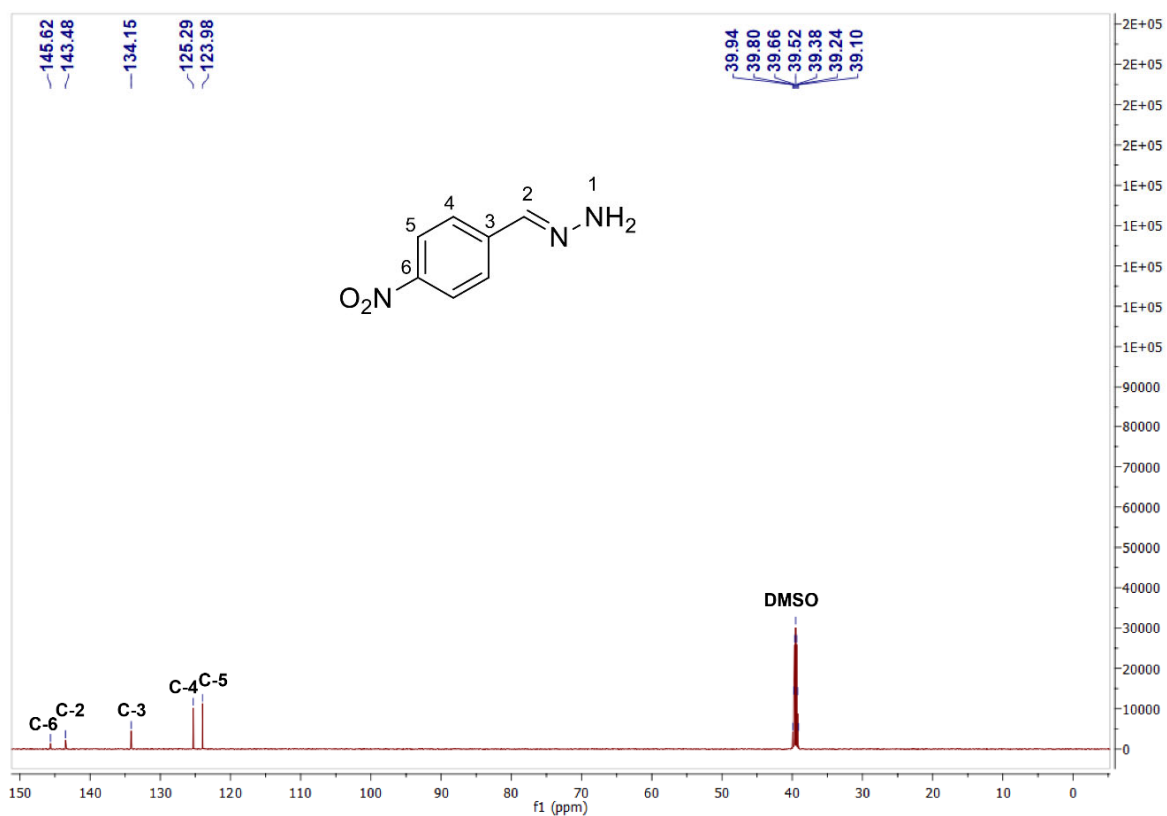

## IR Spectrum

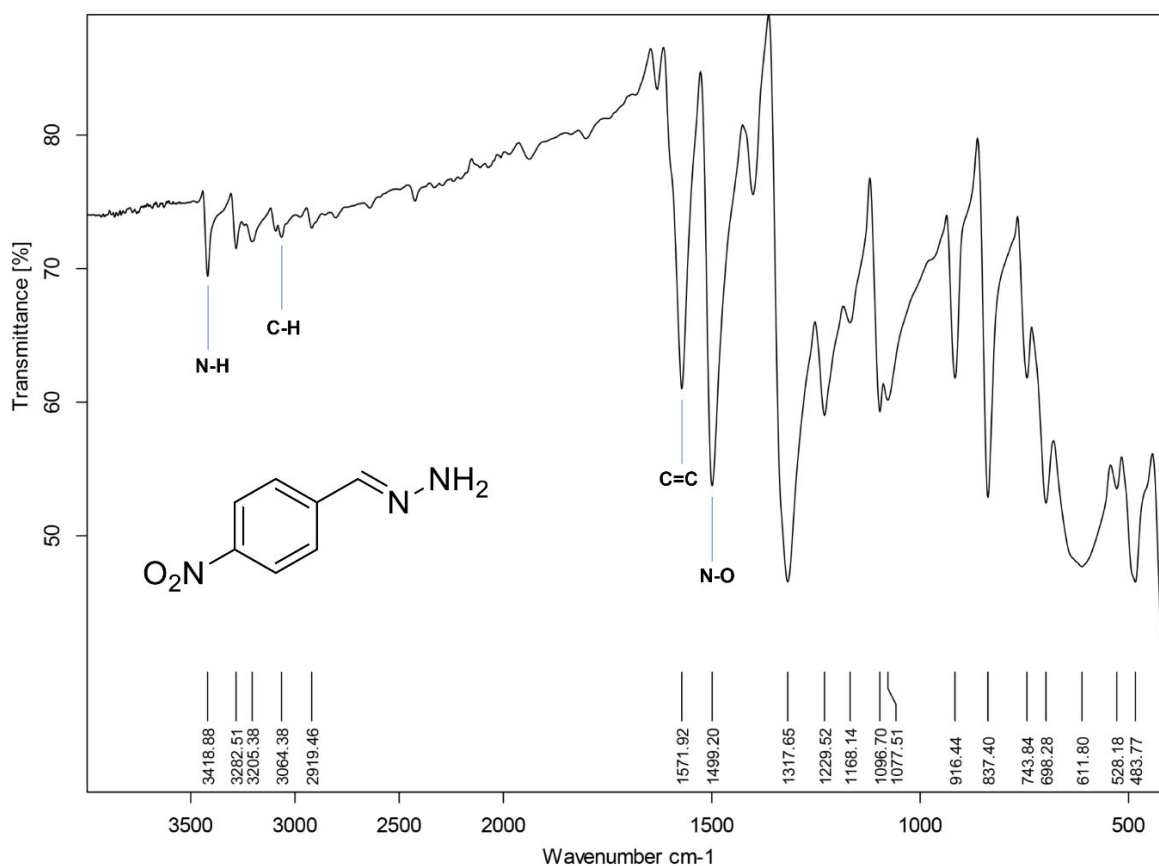

Bright yellow powder; yield: 1.5 g (91%); mp 134-136 °C; IR  $\nu_{\text{max}}$  (cm<sup>-1</sup>): 3419 (N-H), 3064 (C-H), 1572 (C=C), 1499 (N-O); <sup>1</sup>H NMR (600 MHz, DMSO)  $\delta$  8.16 (d,  $J$  = 8.9 Hz, 2H, H-5), 7.73 (s, 1H, H-2), 7.67 (d,  $J$  = 8.9 Hz, 2H, H-4), 7.55 (s, 2H, H-1). <sup>13</sup>C NMR (151 MHz, DMSO)  $\delta$  145.62 (C-6), 143.48 (C-2), 134.15 (C-3), 125.29 (C-4), 123.98 (C-5).

**(1E,2E)-1-Benzylidene-2-[(5-nitrofuran-2-yl)methylene]hydrazine (1a)****<sup>1</sup>H NMR in DMSO**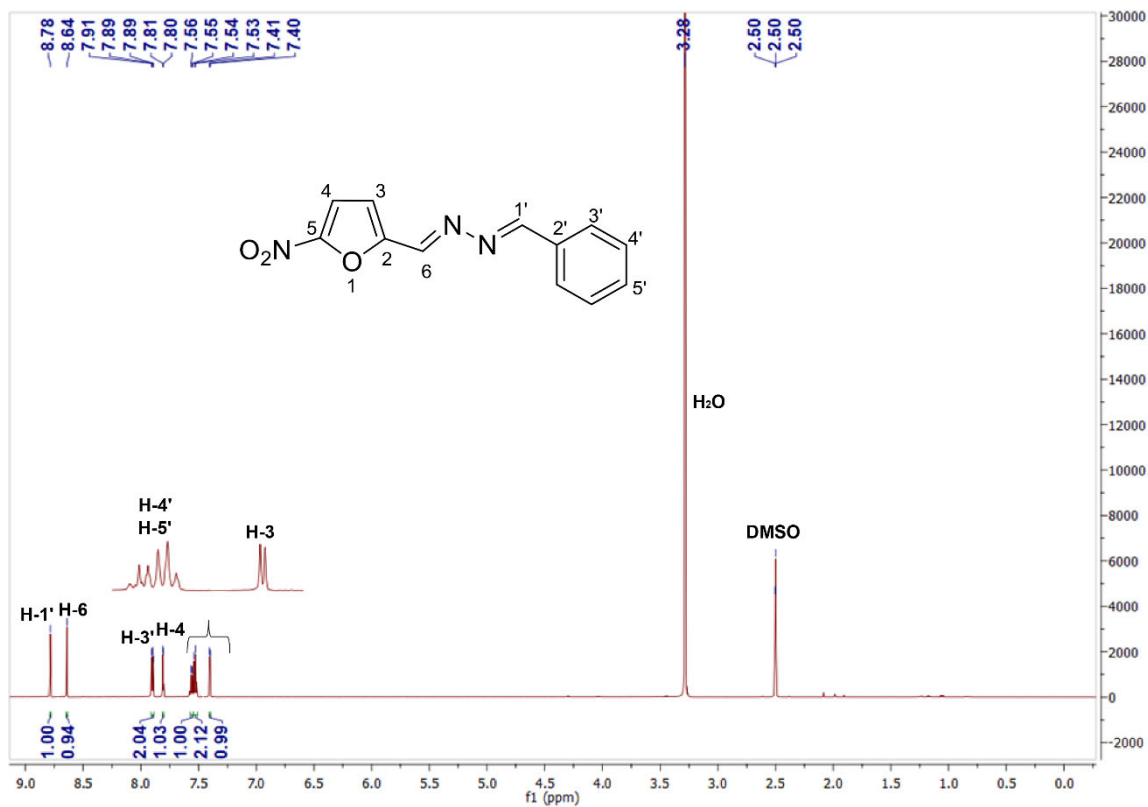**<sup>13</sup>C NMR in DMSO**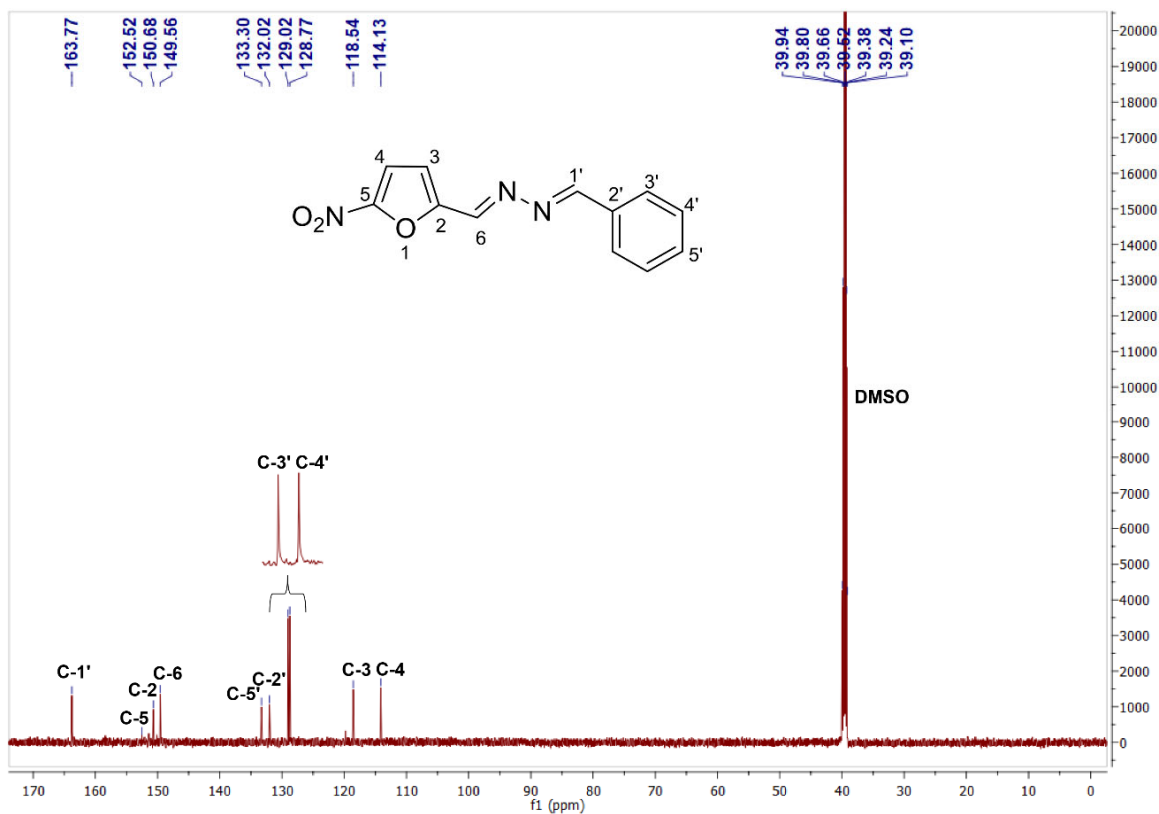

## IR Spectrum

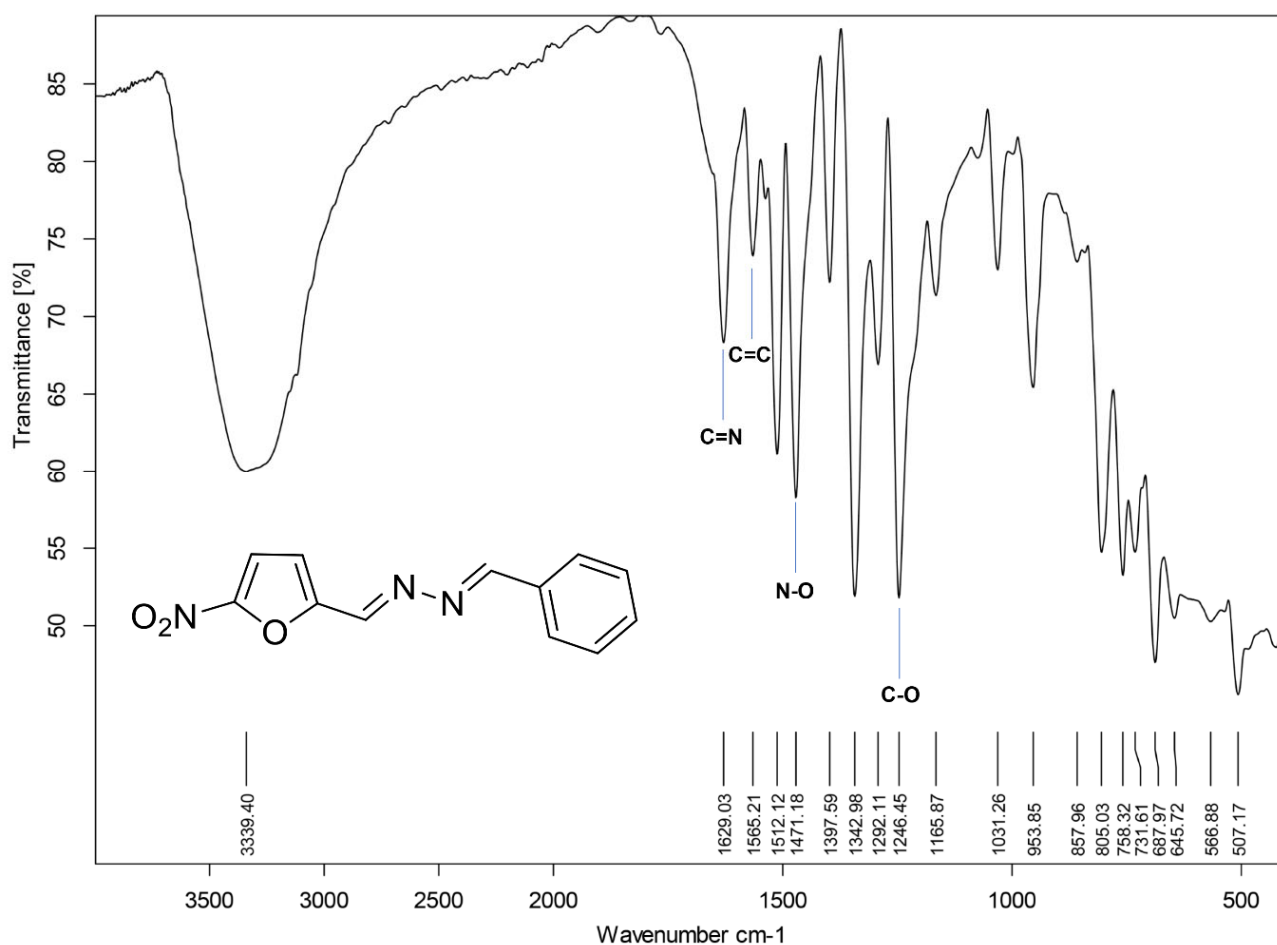

## HRMS

## Acquisition Parameter

|             |            |                       |           |                  |           |
|-------------|------------|-----------------------|-----------|------------------|-----------|
| Source Type | APCI       | Ion Polarity          | Positive  | Set Nebulizer    | 1.6 Bar   |
| Focus       | Not active | Set Capillary         | 4500 V    | Set Dry Heater   | 200 °C    |
| Scan Begin  | 50 m/z     | Set End Plate Offset  | -500 V    | Set Dry Gas      | 8.0 l/min |
| Scan End    | 1600 m/z   | Set Collision Cell RF | 100.0 Vpp | Set Divert Valve | Waste     |

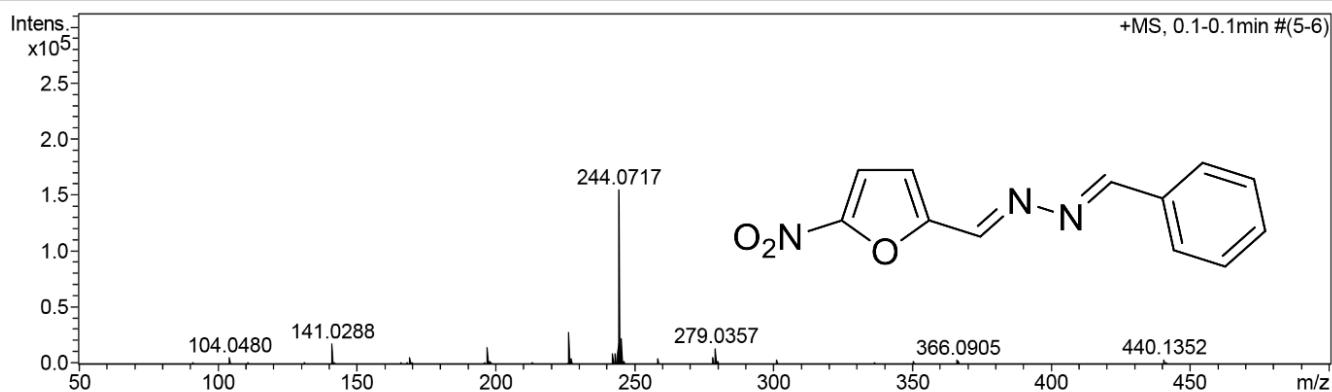

| Meas. m/z | # | Formula           | Score  | m/z      | err [mDa] | err [ppm] | mSigma | rdb | e <sup>-</sup> Conf | N-Rule |
|-----------|---|-------------------|--------|----------|-----------|-----------|--------|-----|---------------------|--------|
| 244.0717  | 1 | C 12 H 10 N 3 O 3 | 100.00 | 244.0717 | -0.1      | -0.3      | 2.1    | 9.5 | even                | ok     |

**(1E,2E)-1-(4-Fluorobenzylidene)-2-[(5-nitrofuran-2-yl)methylene]hydrazine (2a)****<sup>1</sup>H NMR in DMSO**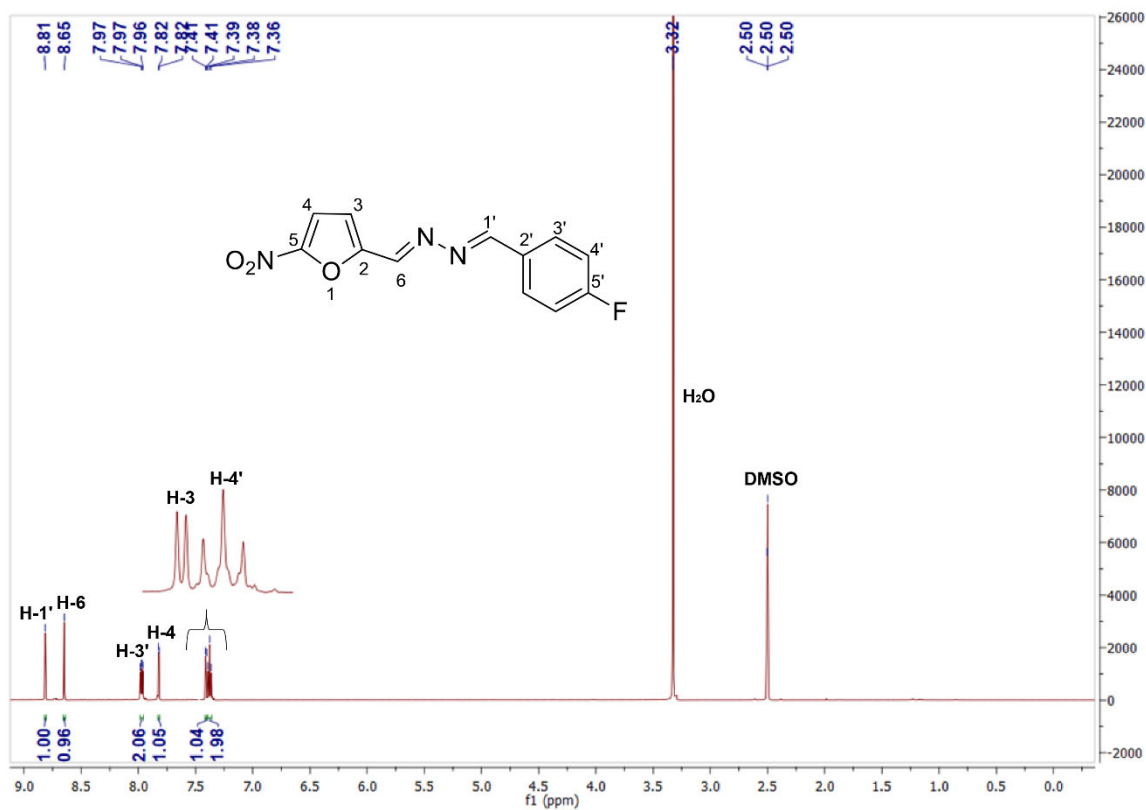**<sup>13</sup>C NMR in DMSO**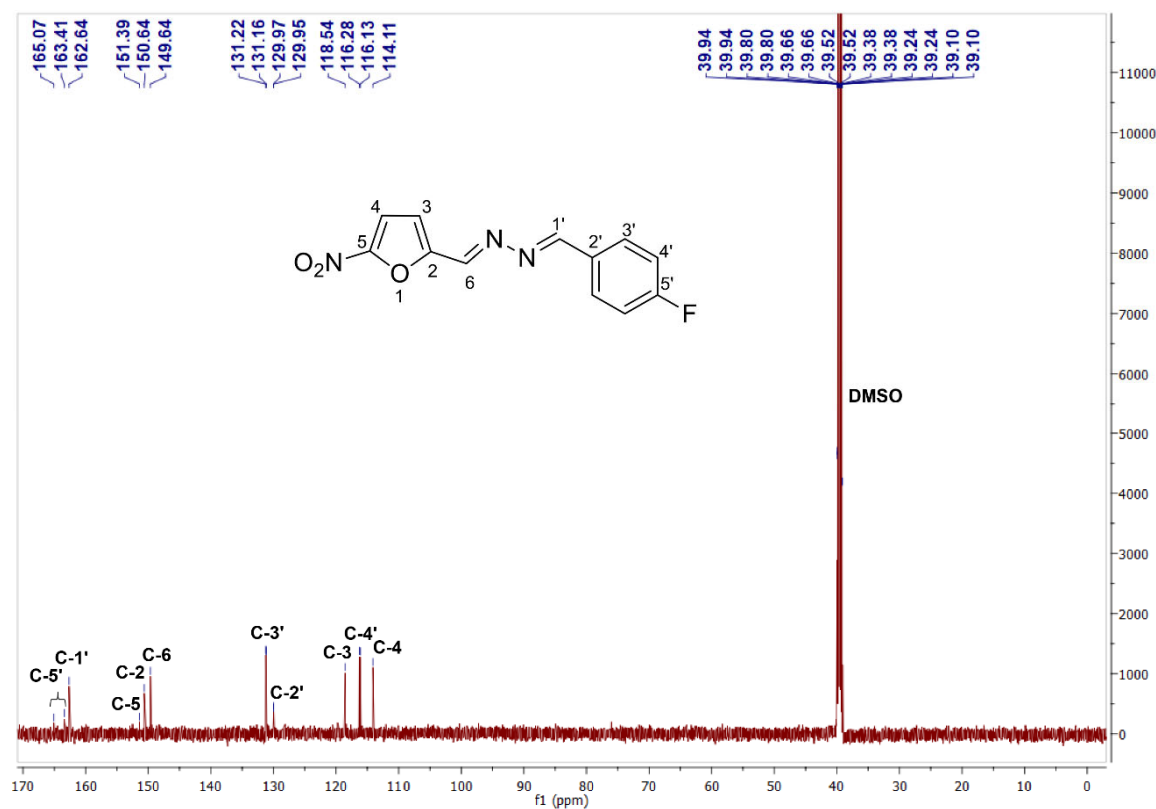

## IR Spectrum

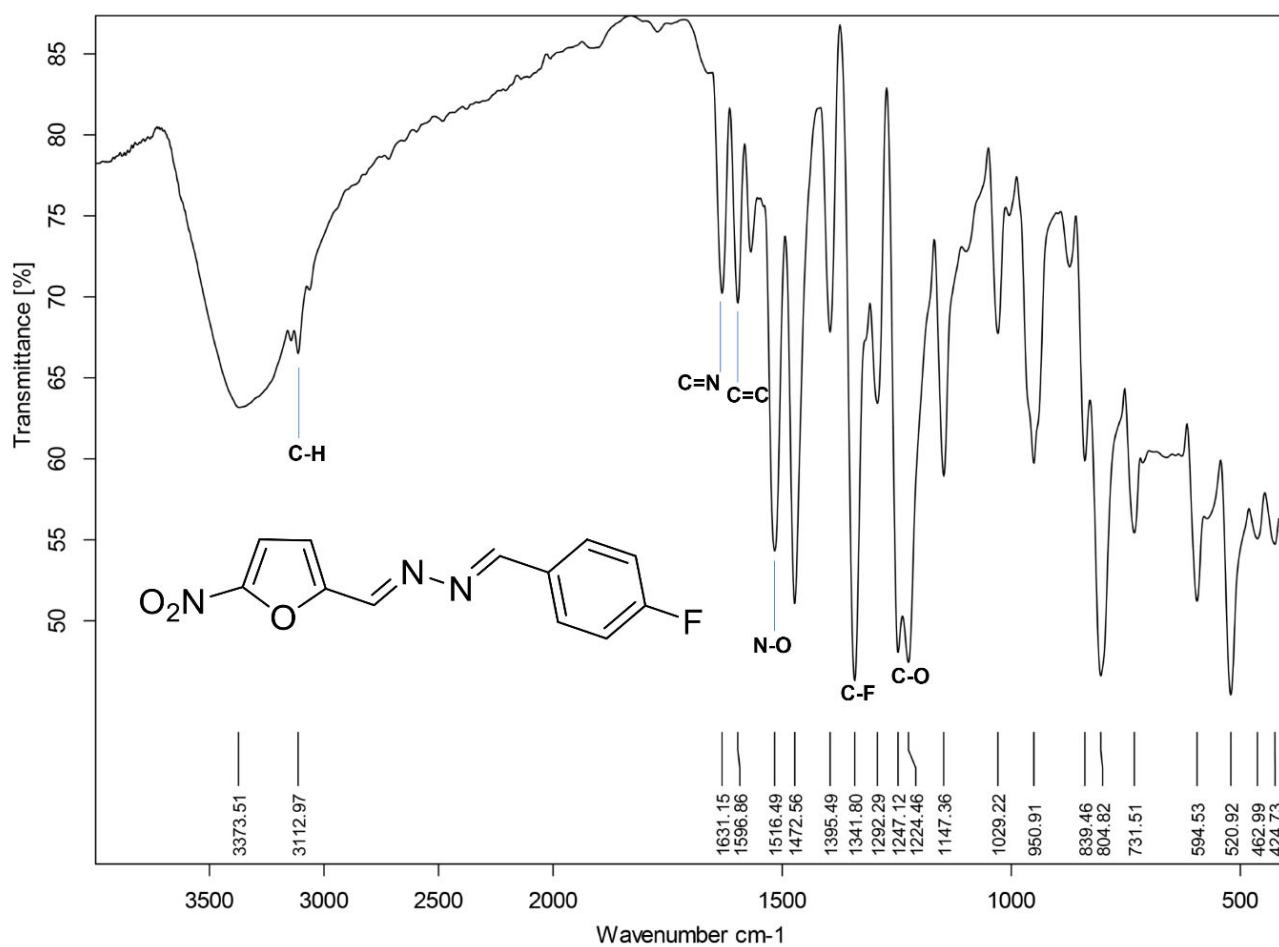

## HRMS

## Acquisition Parameter

|             |            |                       |           |                  |           |
|-------------|------------|-----------------------|-----------|------------------|-----------|
| Source Type | APCI       | Ion Polarity          | Positive  | Set Nebulizer    | 1.6 Bar   |
| Focus       | Not active | Set Capillary         | 4500 V    | Set Dry Heater   | 200 °C    |
| Scan Begin  | 50 m/z     | Set End Plate Offset  | -500 V    | Set Dry Gas      | 8.0 l/min |
| Scan End    | 1600 m/z   | Set Collision Cell RF | 100.0 Vpp | Set Divert Valve | Waste     |

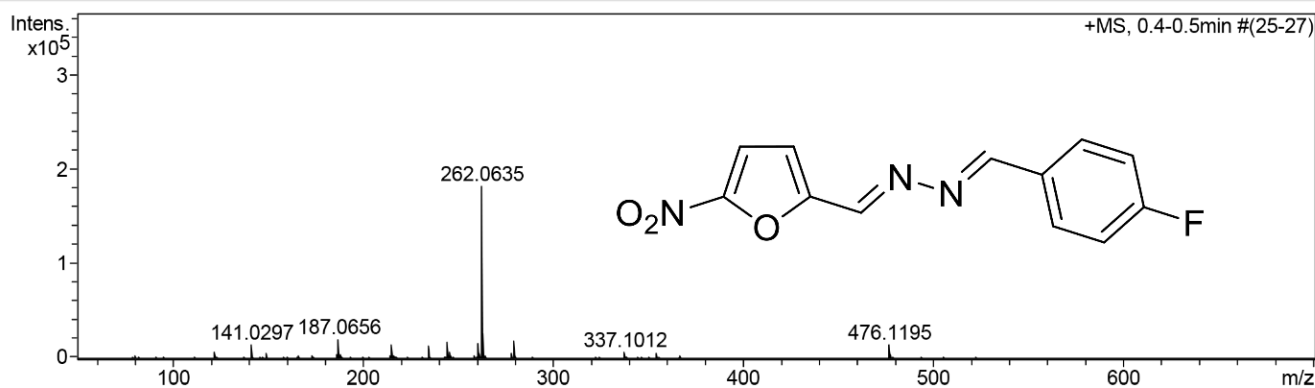

| Meas. m/z | # | Formula                                                       | Score  | m/z      | err [mDa] | err [ppm] | mSigma | rdb | e <sup>-</sup> Conf | N-Rule |
|-----------|---|---------------------------------------------------------------|--------|----------|-----------|-----------|--------|-----|---------------------|--------|
| 262.0635  | 1 | C <sub>12</sub> H <sub>9</sub> FN <sub>3</sub> O <sub>3</sub> | 100.00 | 262.0622 | -1.3      | -5.0      | 1.2    | 9.5 | even                | ok     |

**(1E,2E)-1-(4-Chlorobenzylidene)-2-[(5-nitrofuran-2-yl)methylene]hydrazine (3a)****<sup>1</sup>H NMR in DMSO**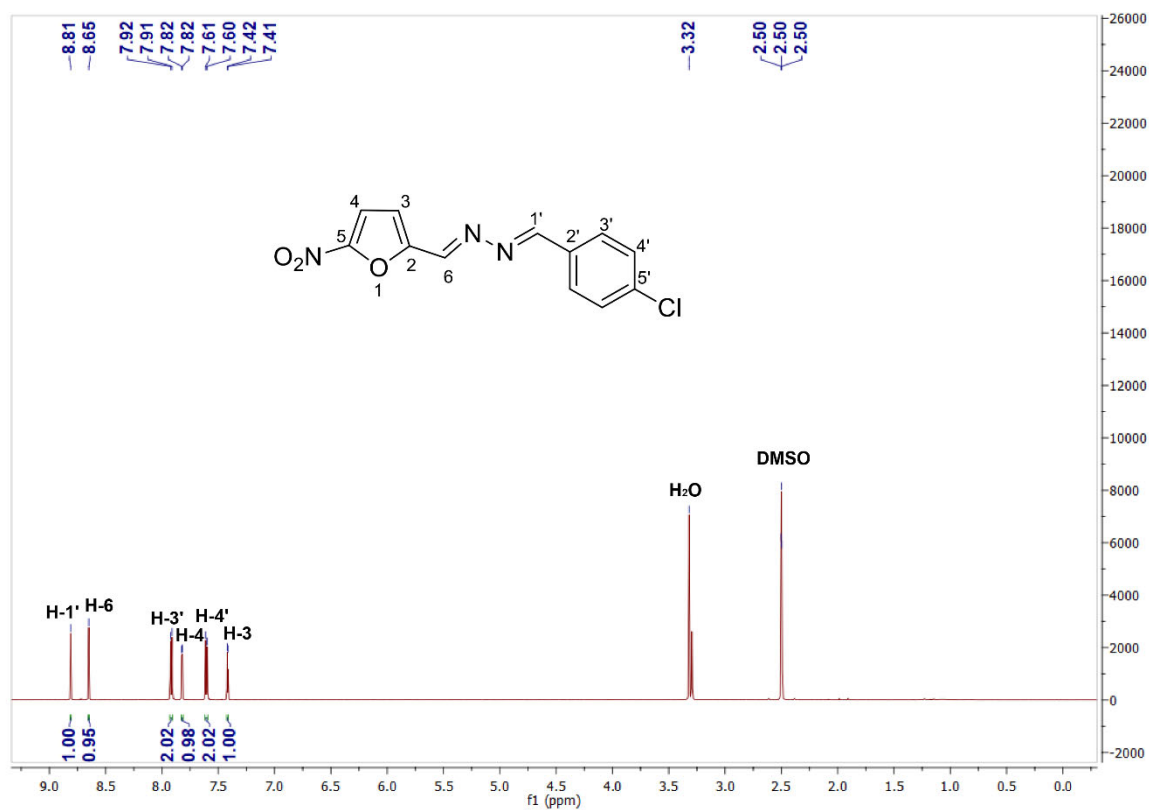**<sup>13</sup>C NMR in DMSO**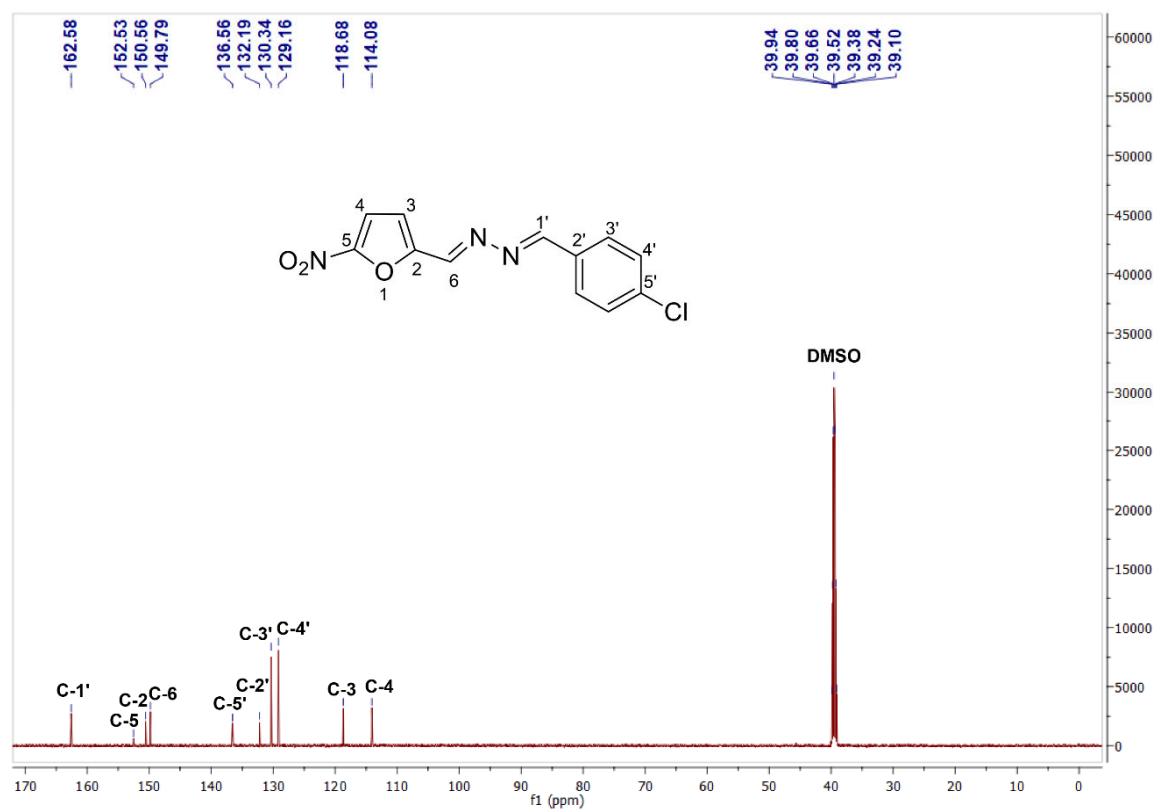



## IR Spectrum

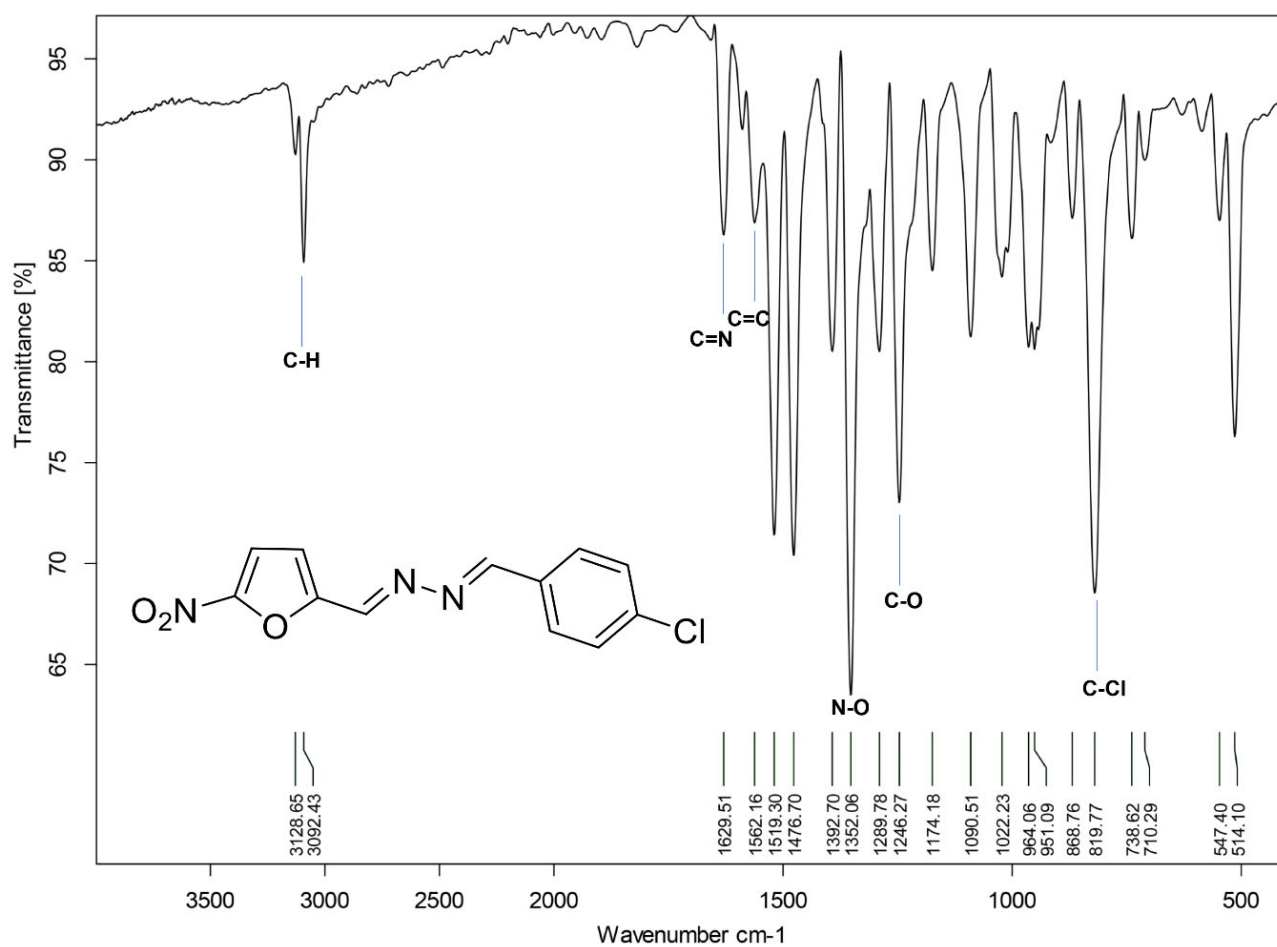

## HRMS

## Acquisition Parameter

|             |            |                       |           |                  |           |
|-------------|------------|-----------------------|-----------|------------------|-----------|
| Source Type | APCI       | Ion Polarity          | Positive  | Set Nebulizer    | 1.6 Bar   |
| Focus       | Not active | Set Capillary         | 4500 V    | Set Dry Heater   | 200 °C    |
| Scan Begin  | 50 m/z     | Set End Plate Offset  | -500 V    | Set Dry Gas      | 8.0 l/min |
| Scan End    | 1600 m/z   | Set Collision Cell RF | 100.0 Vpp | Set Divert Valve | Waste     |

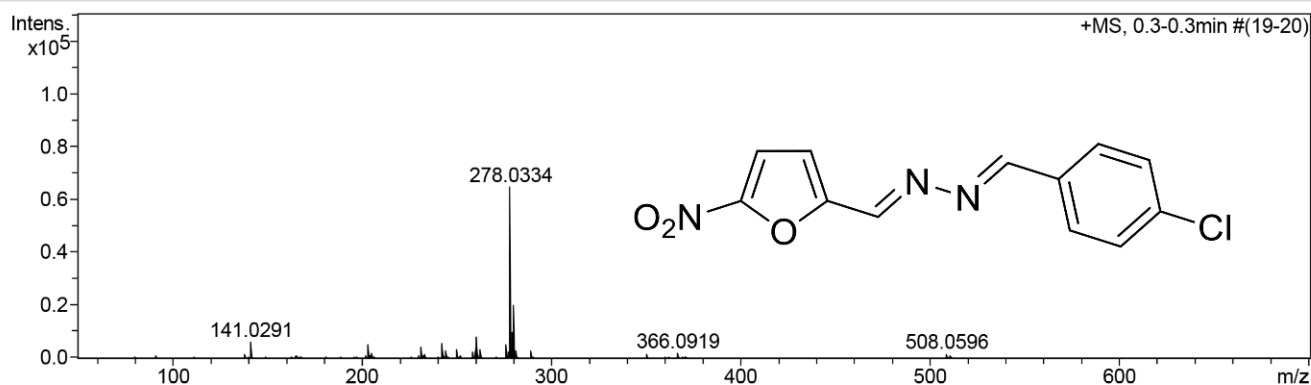

| Meas. m/z | # | Formula                                                        | Score  | m/z      | err [mDa] | err [ppm] | mSigma | rdb | e <sup>-</sup> Conf | N-Rule |
|-----------|---|----------------------------------------------------------------|--------|----------|-----------|-----------|--------|-----|---------------------|--------|
| 278.0334  | 1 | C <sub>12</sub> H <sub>9</sub> ClN <sub>3</sub> O <sub>3</sub> | 100.00 | 278.0327 | -0.7      | -2.5      | 12.6   | 9.5 | even                | ok     |

**(1*E*,2*E*)-1-(4-Bromobenzylidene)-2-[(5-nitrofuran-2-yl)methylene]hydrazine (4a)****<sup>1</sup>H NMR in DMSO**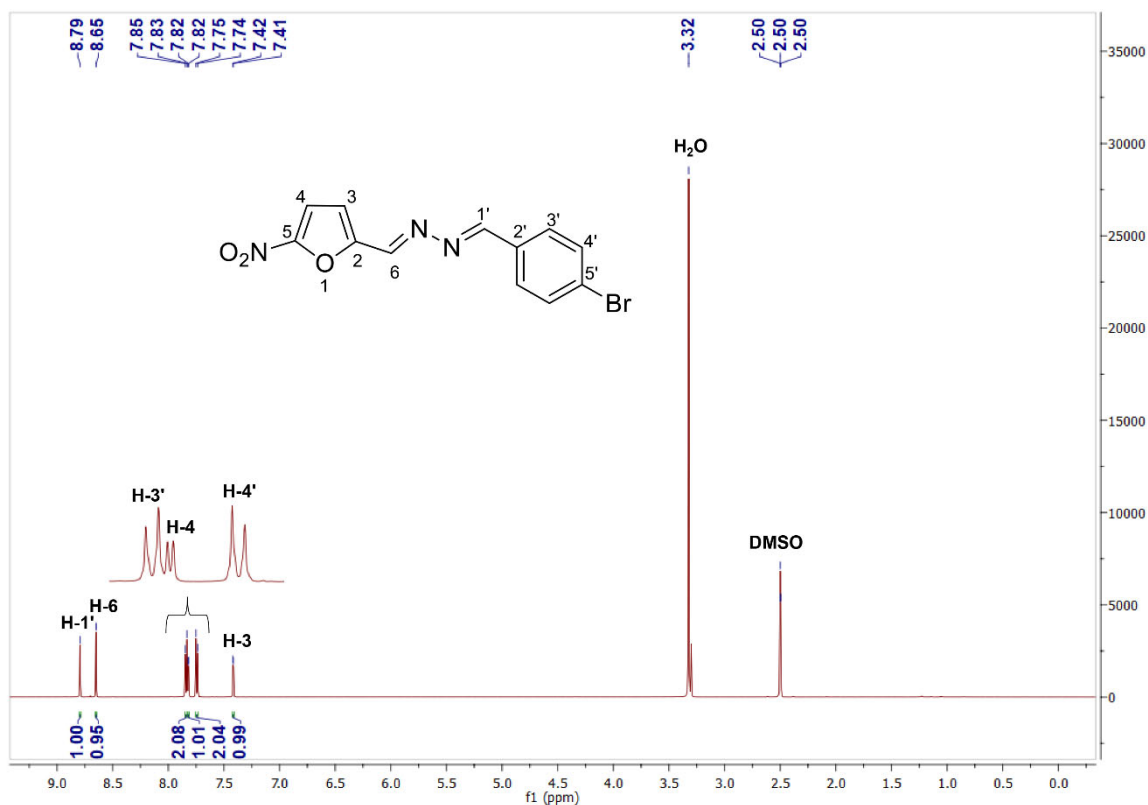**<sup>13</sup>C NMR in DMSO**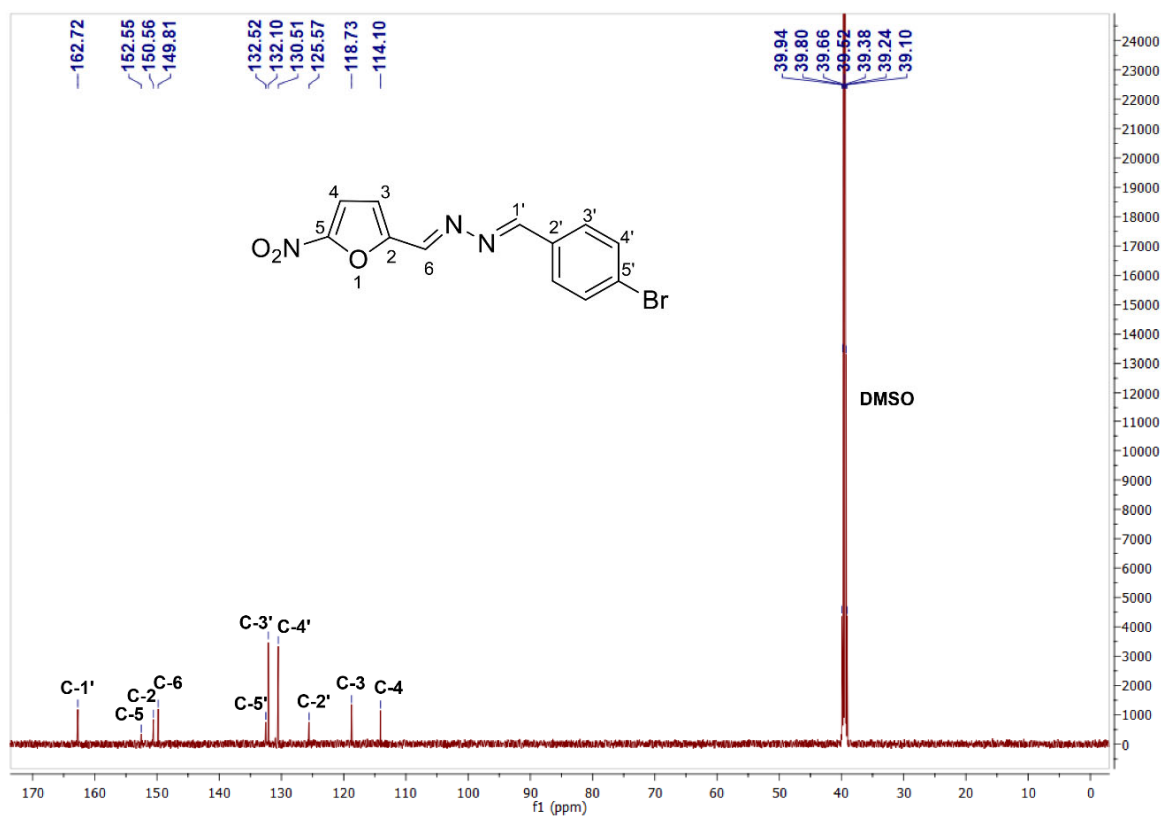

## IR Spectrum

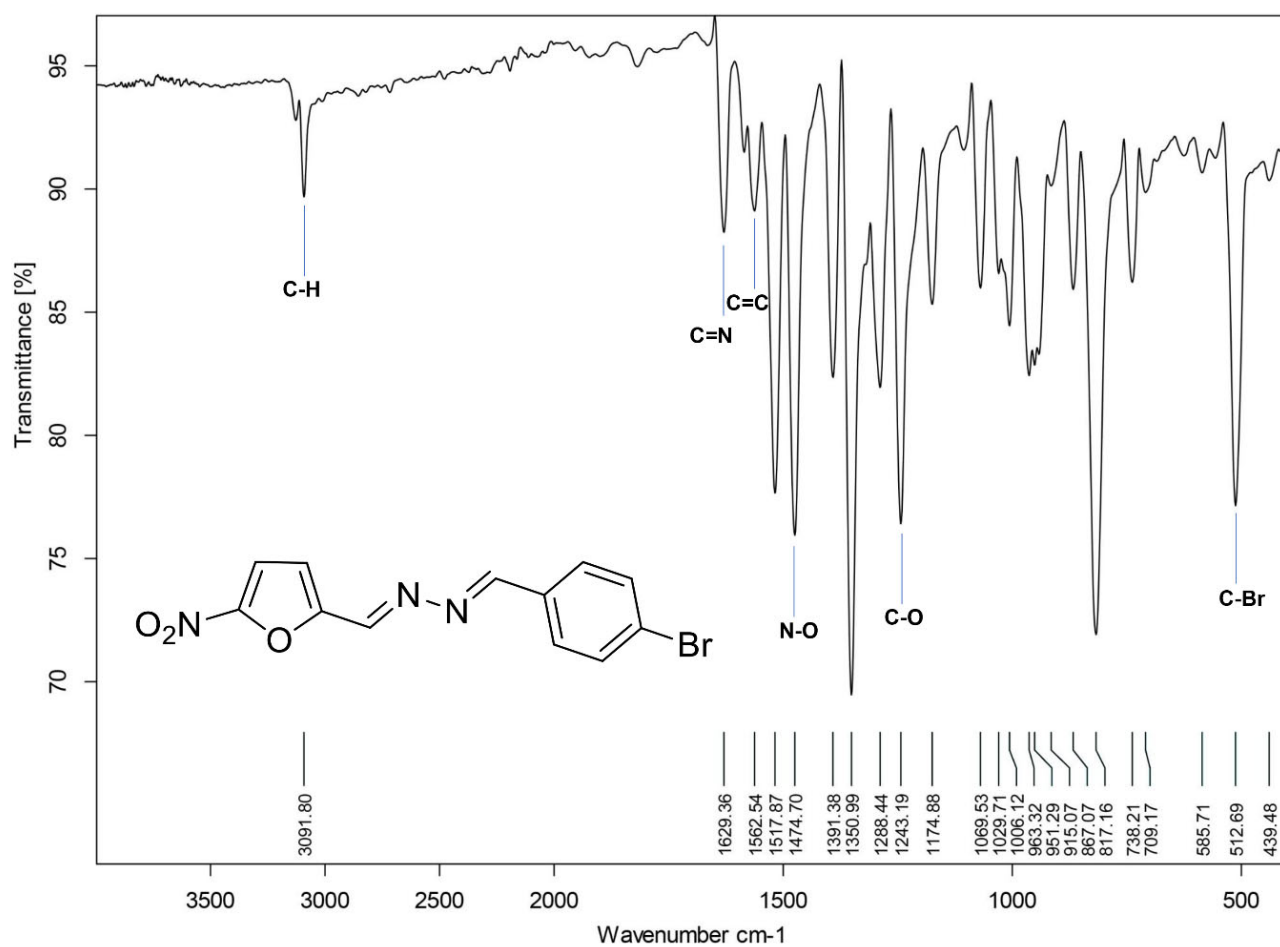

## HRMS

## Acquisition Parameter

|             |            |                       |           |                  |           |
|-------------|------------|-----------------------|-----------|------------------|-----------|
| Source Type | APCI       | Ion Polarity          | Positive  | Set Nebulizer    | 1.6 Bar   |
| Focus       | Not active | Set Capillary         | 4500 V    | Set Dry Heater   | 200 °C    |
| Scan Begin  | 50 m/z     | Set End Plate Offset  | -500 V    | Set Dry Gas      | 8.0 l/min |
| Scan End    | 1600 m/z   | Set Collision Cell RF | 100.0 Vpp | Set Divert Valve | Waste     |

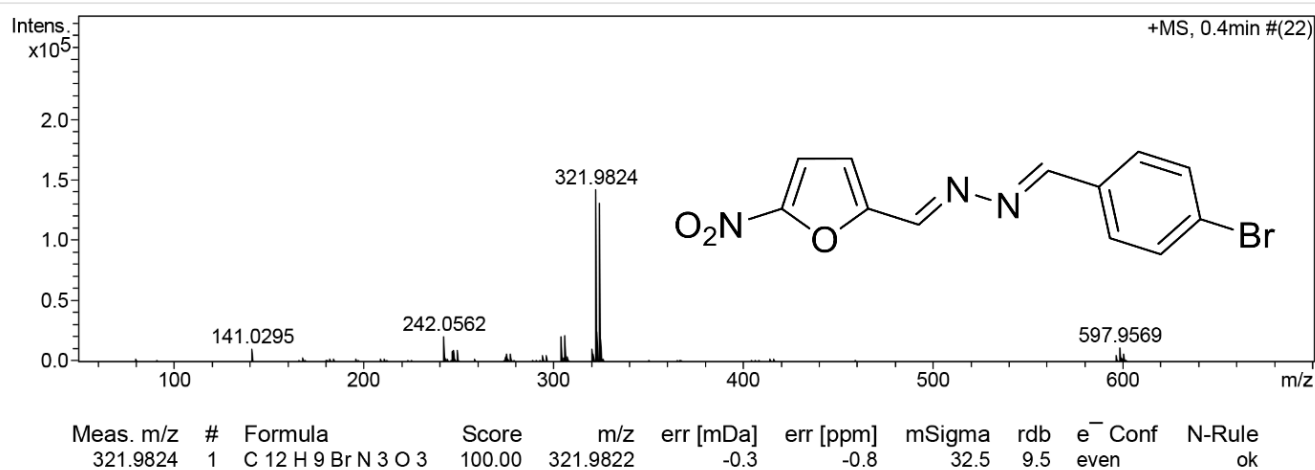

**(1*E*,2*E*)-1-(4-Methylbenzylidene)-2-[(5-nitrofuran-2-yl)methylene]hydrazine (5a)****<sup>1</sup>H NMR in DMSO**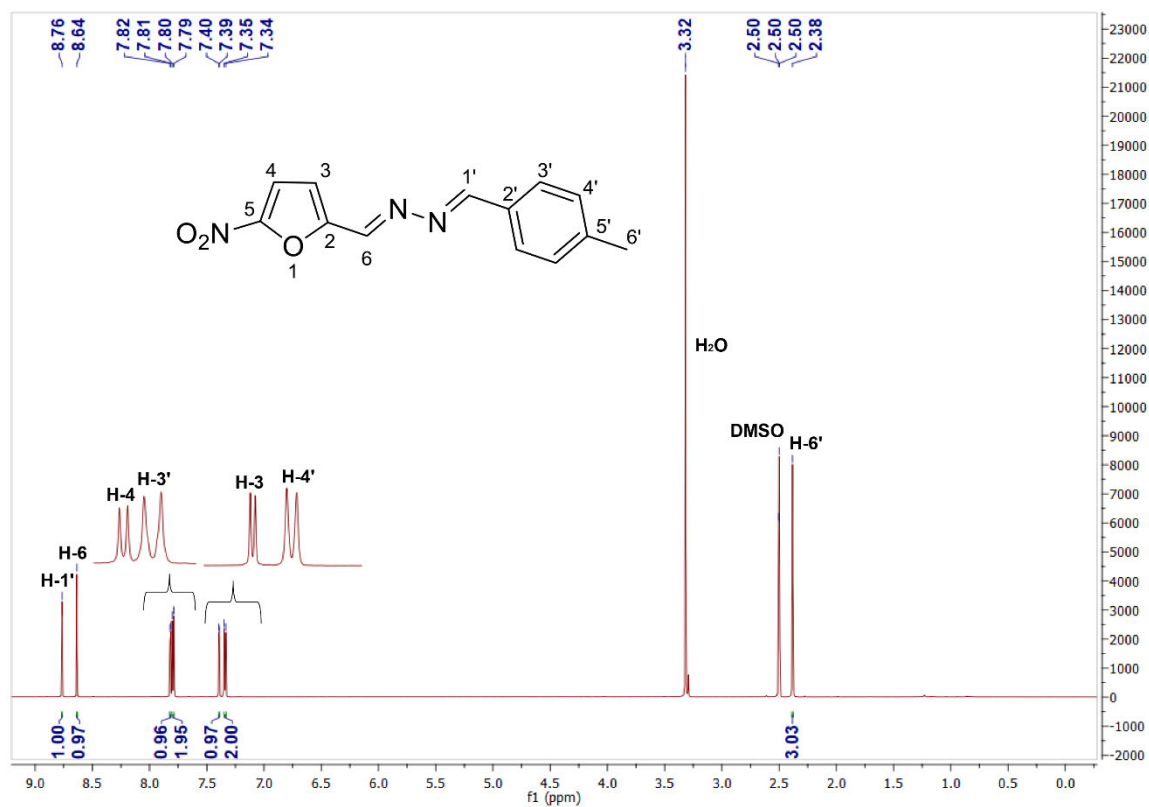**<sup>13</sup>C NMR in DMSO**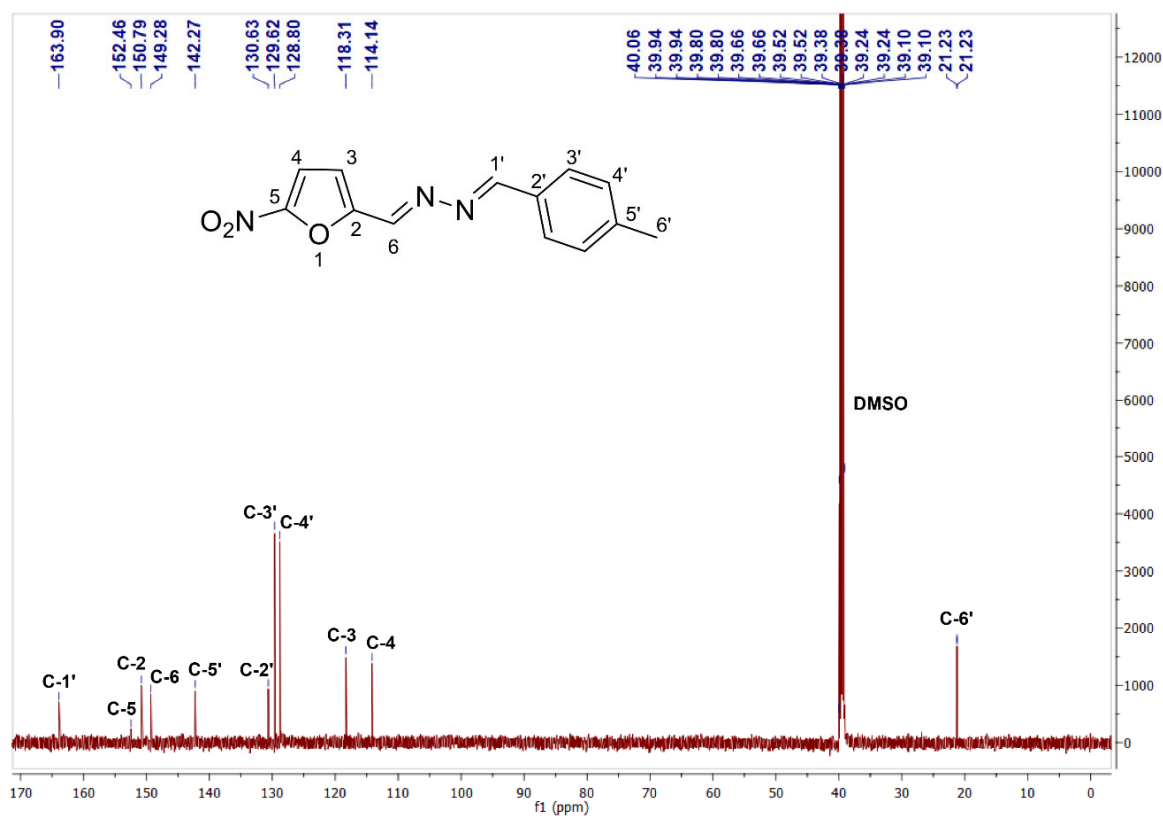

## IR Spectrum

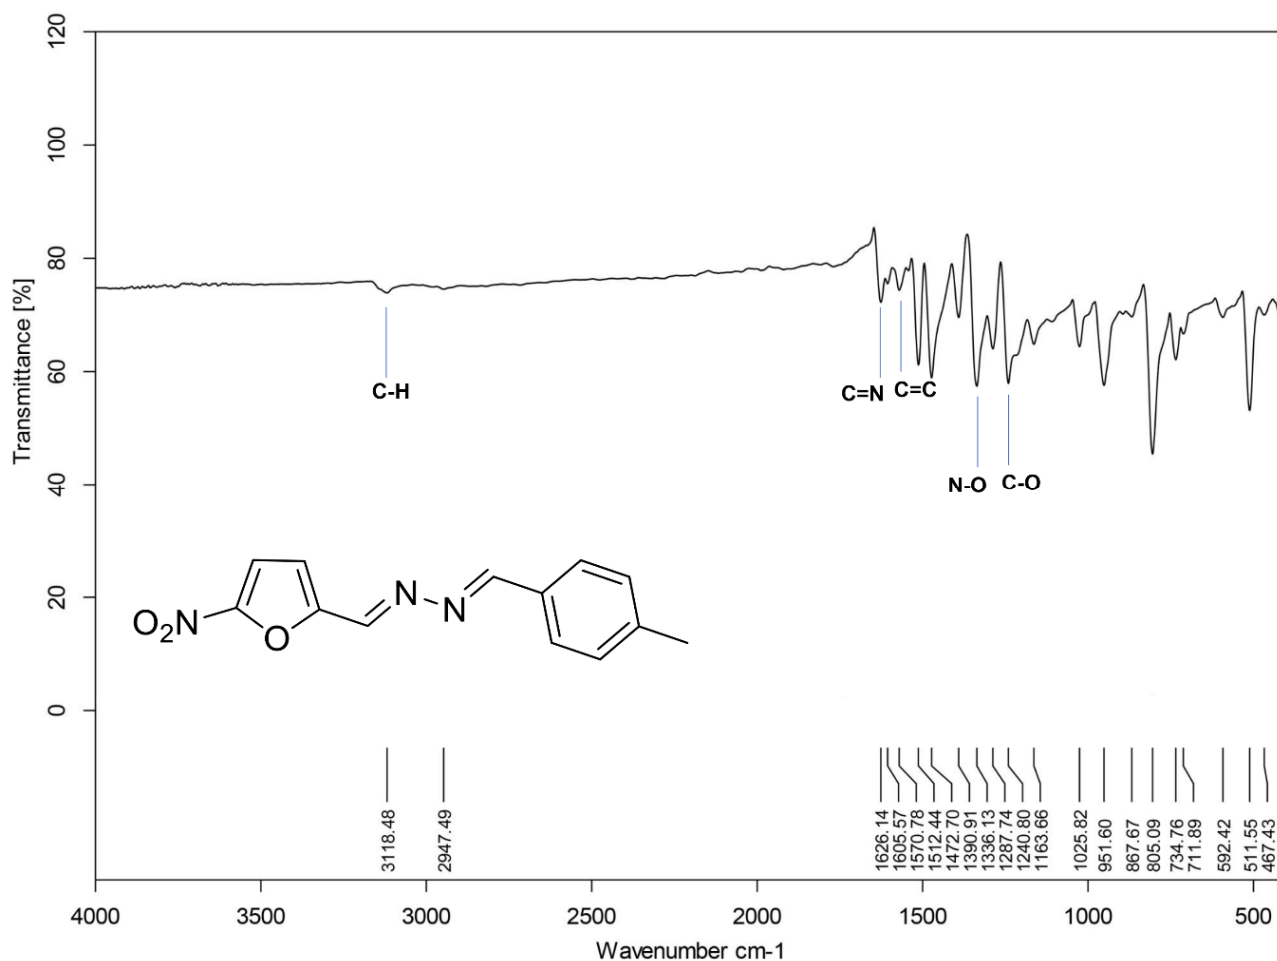

## HRMS

## Acquisition Parameter

|             |            |                       |           |                  |           |
|-------------|------------|-----------------------|-----------|------------------|-----------|
| Source Type | APCI       | Ion Polarity          | Positive  | Set Nebulizer    | 1.6 Bar   |
| Focus       | Not active | Set Capillary         | 4500 V    | Set Dry Heater   | 200 °C    |
| Scan Begin  | 50 m/z     | Set End Plate Offset  | -500 V    | Set Dry Gas      | 8.0 l/min |
| Scan End    | 1600 m/z   | Set Collision Cell RF | 100.0 Vpp | Set Divert Valve | Waste     |

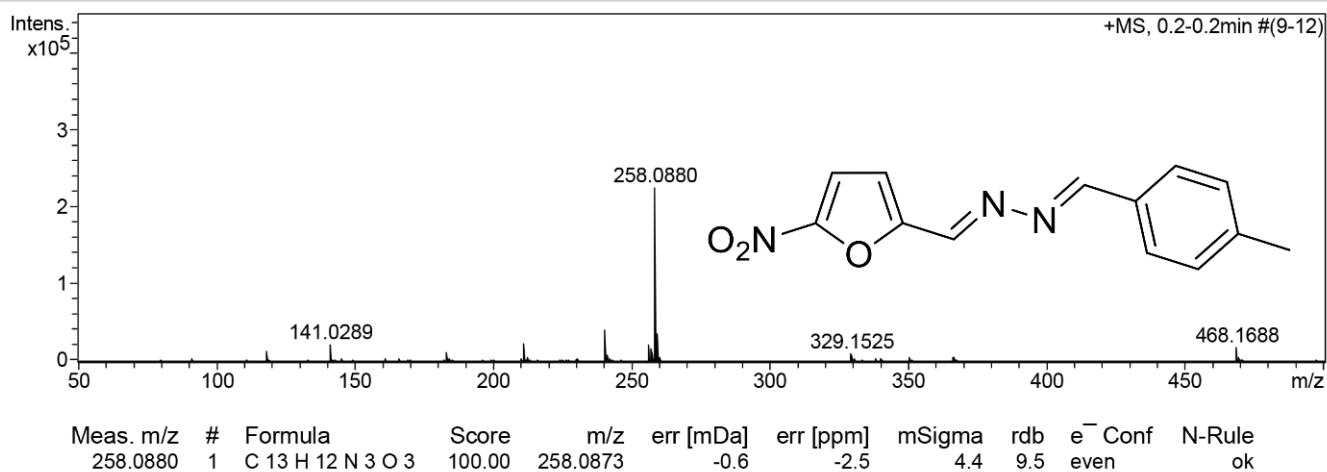

**(1E,2E)-1-(4-Methoxybenzylidene)-2-[(5-nitrofuran-2-yl)methylene]hydrazine (6a)****<sup>1</sup>H NMR in DMSO**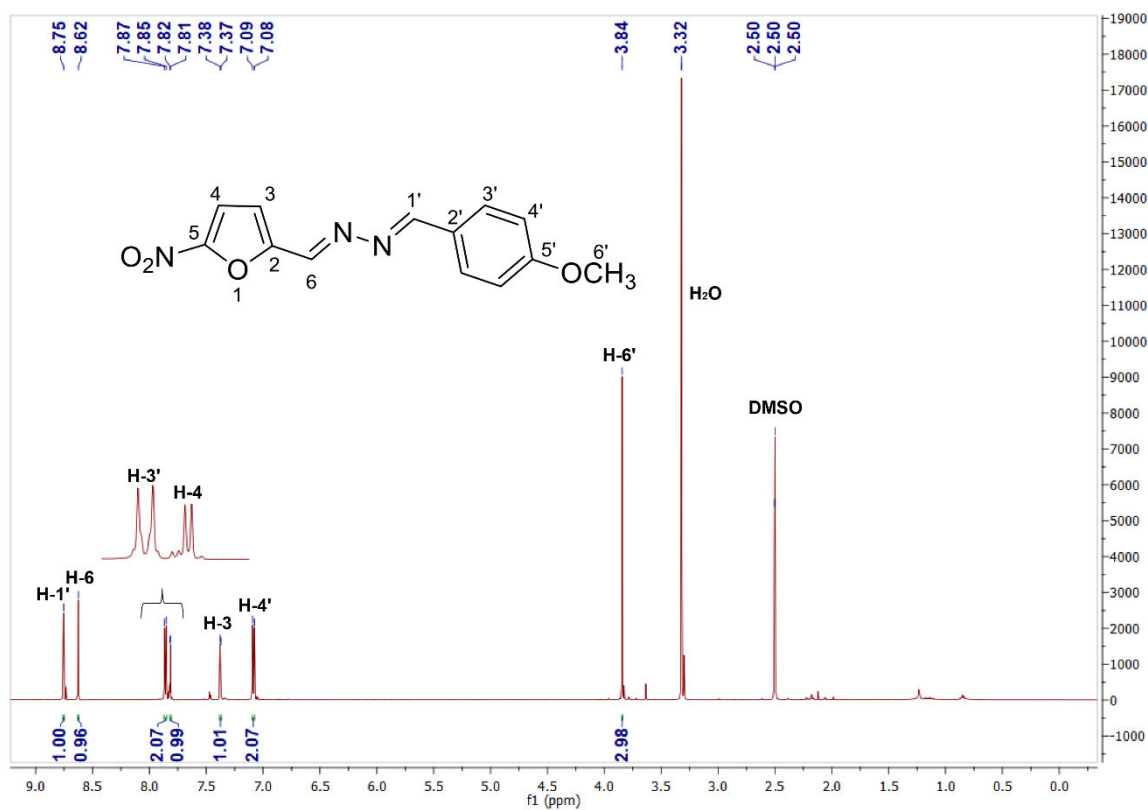**<sup>13</sup>C NMR in DMSO**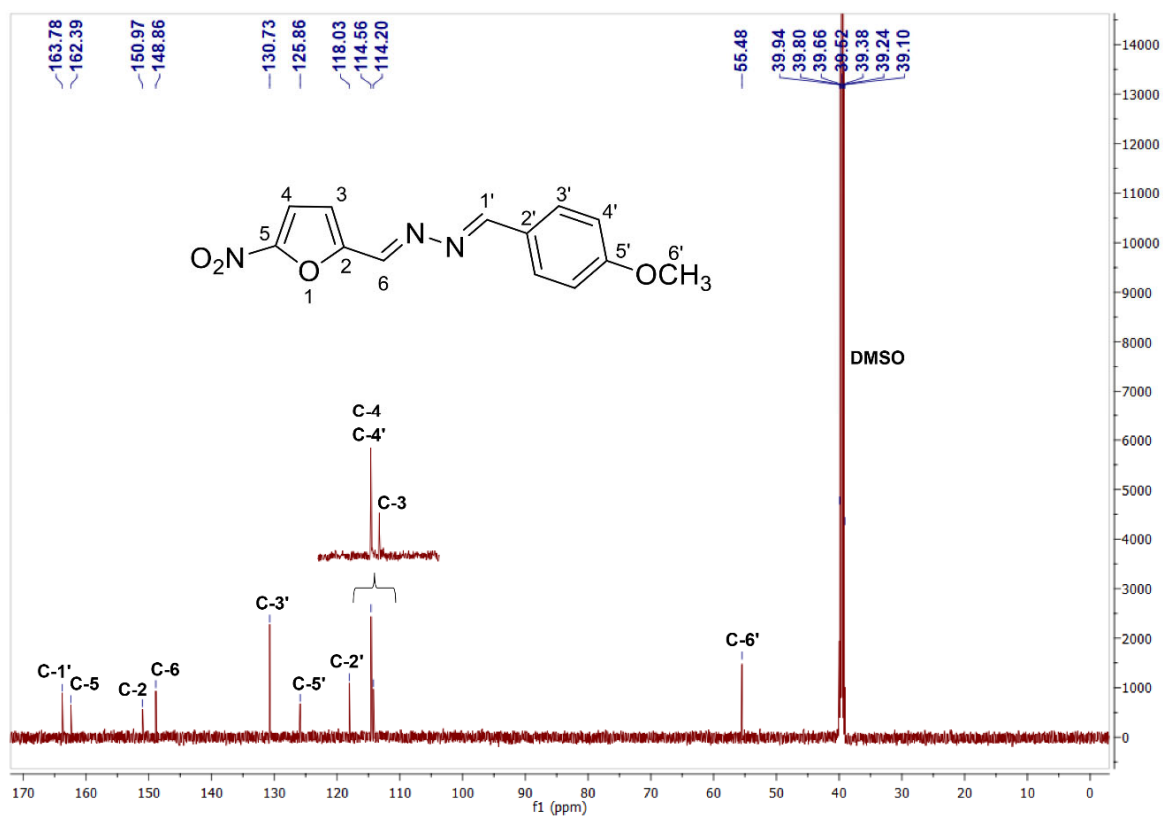

## IR Spectrum

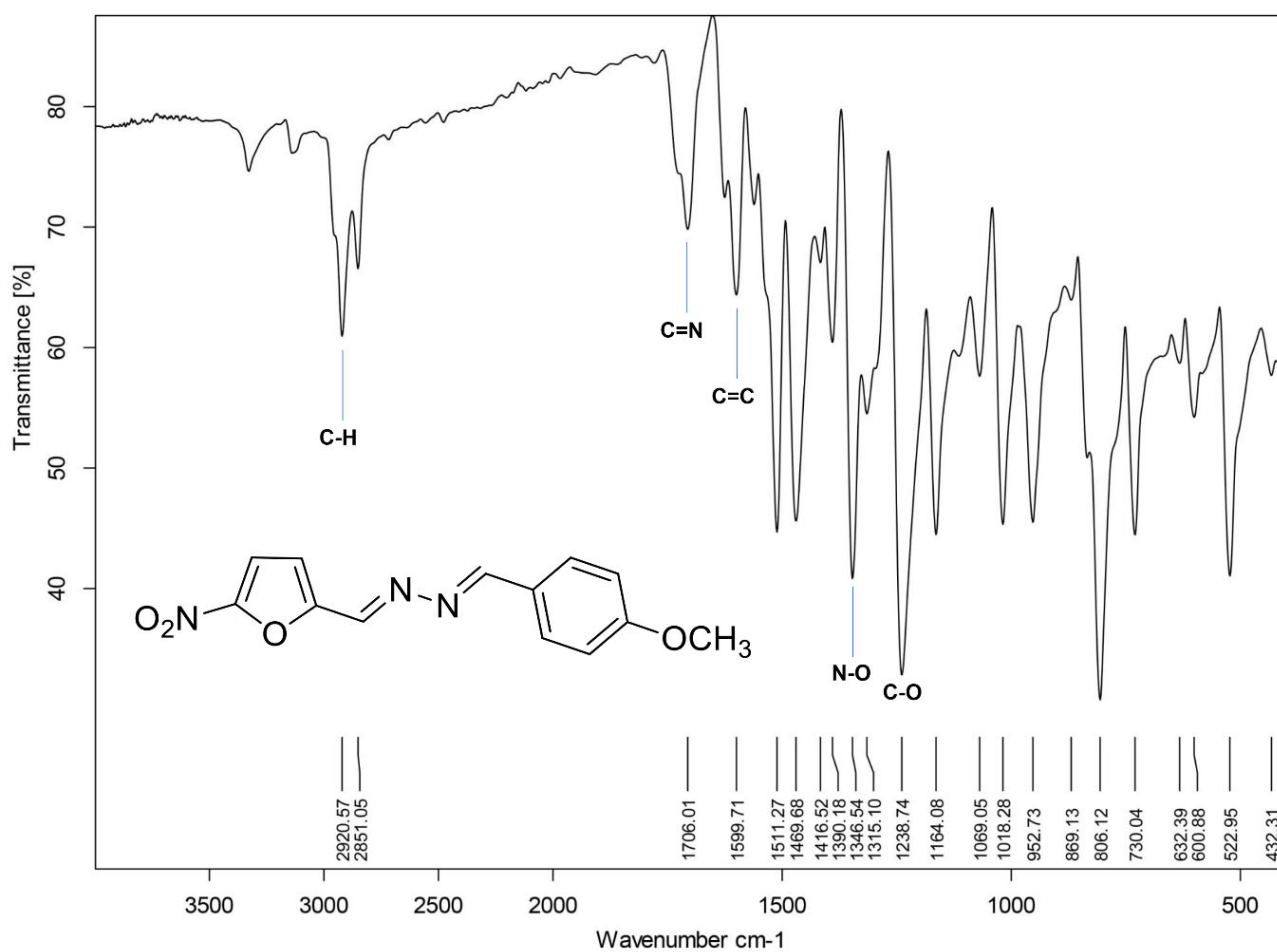

## HRMS

## Acquisition Parameter

|             |            |                       |           |                  |           |
|-------------|------------|-----------------------|-----------|------------------|-----------|
| Source Type | APCI       | Ion Polarity          | Positive  | Set Nebulizer    | 1.6 Bar   |
| Focus       | Not active | Set Capillary         | 4500 V    | Set Dry Heater   | 200 °C    |
| Scan Begin  | 50 m/z     | Set End Plate Offset  | -500 V    | Set Dry Gas      | 8.0 l/min |
| Scan End    | 1600 m/z   | Set Collision Cell RF | 100.0 Vpp | Set Divert Valve | Waste     |

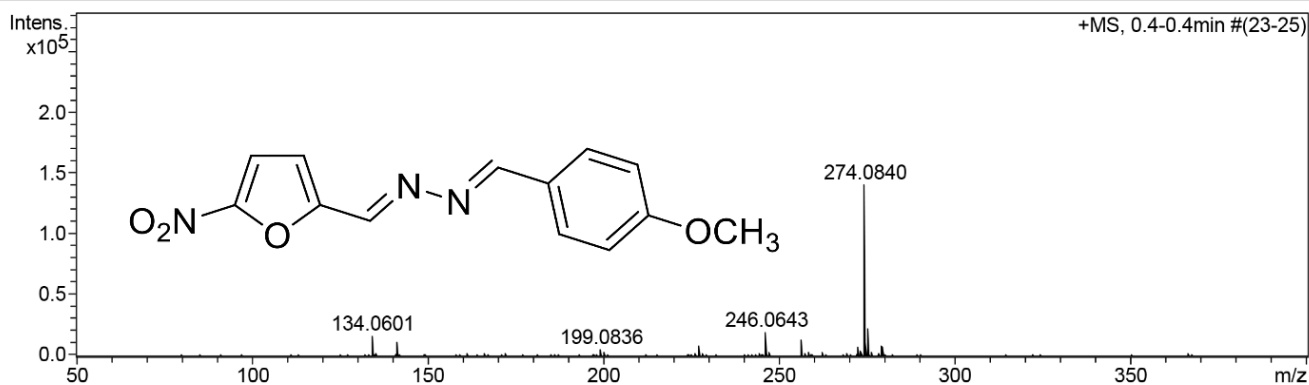

| Meas. m/z | # | Formula           | Score  | m/z      | err [mDa] | err [ppm] | mSigma | rdb | e <sup>-</sup> Conf | N-Rule |
|-----------|---|-------------------|--------|----------|-----------|-----------|--------|-----|---------------------|--------|
| 274.0840  | 1 | C 13 H 12 N 3 O 4 | 100.00 | 274.0822 | -1.8      | -6.5      | 2.0    | 9.5 | even                | ok     |

**(1*E*,2*E*)-1-[4-(Benzyloxy)benzylidene]-2-[(5-nitrofuran-2-yl)methylene]hydrazine (7a)****<sup>1</sup>H NMR in DMSO**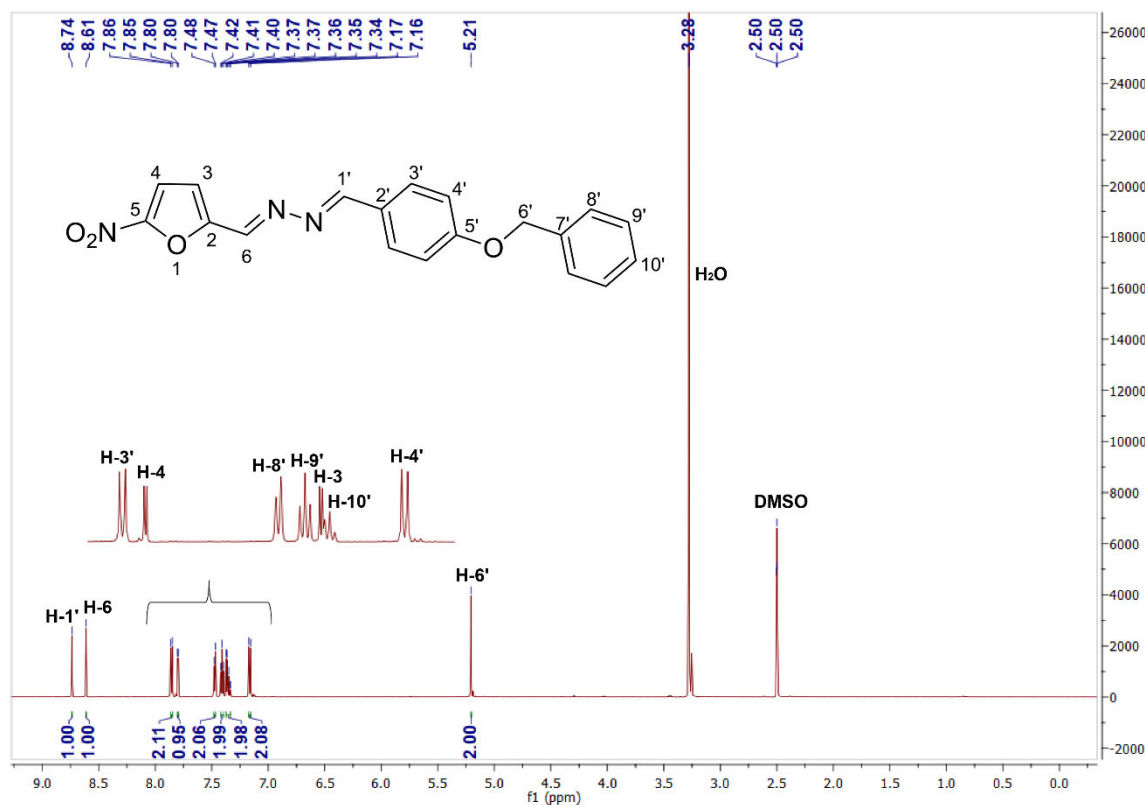**<sup>13</sup>C NMR in DMSO**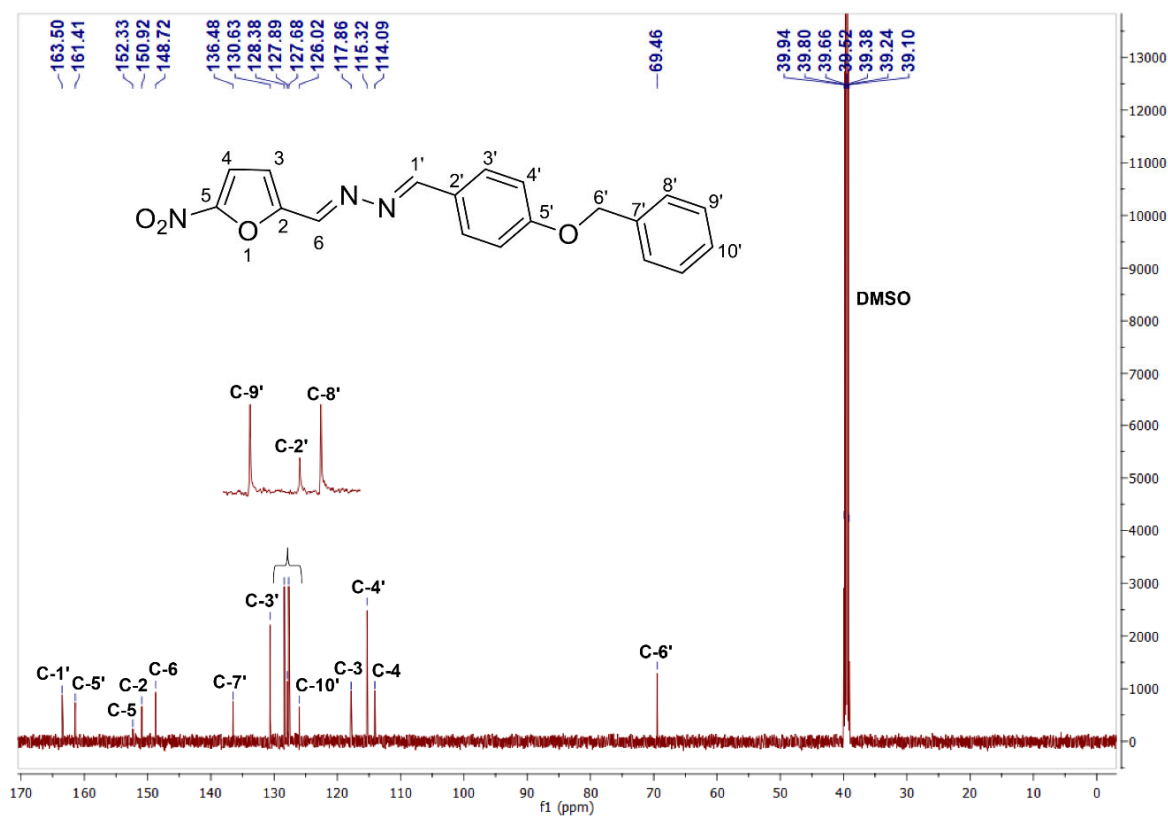



## IR Spectrum

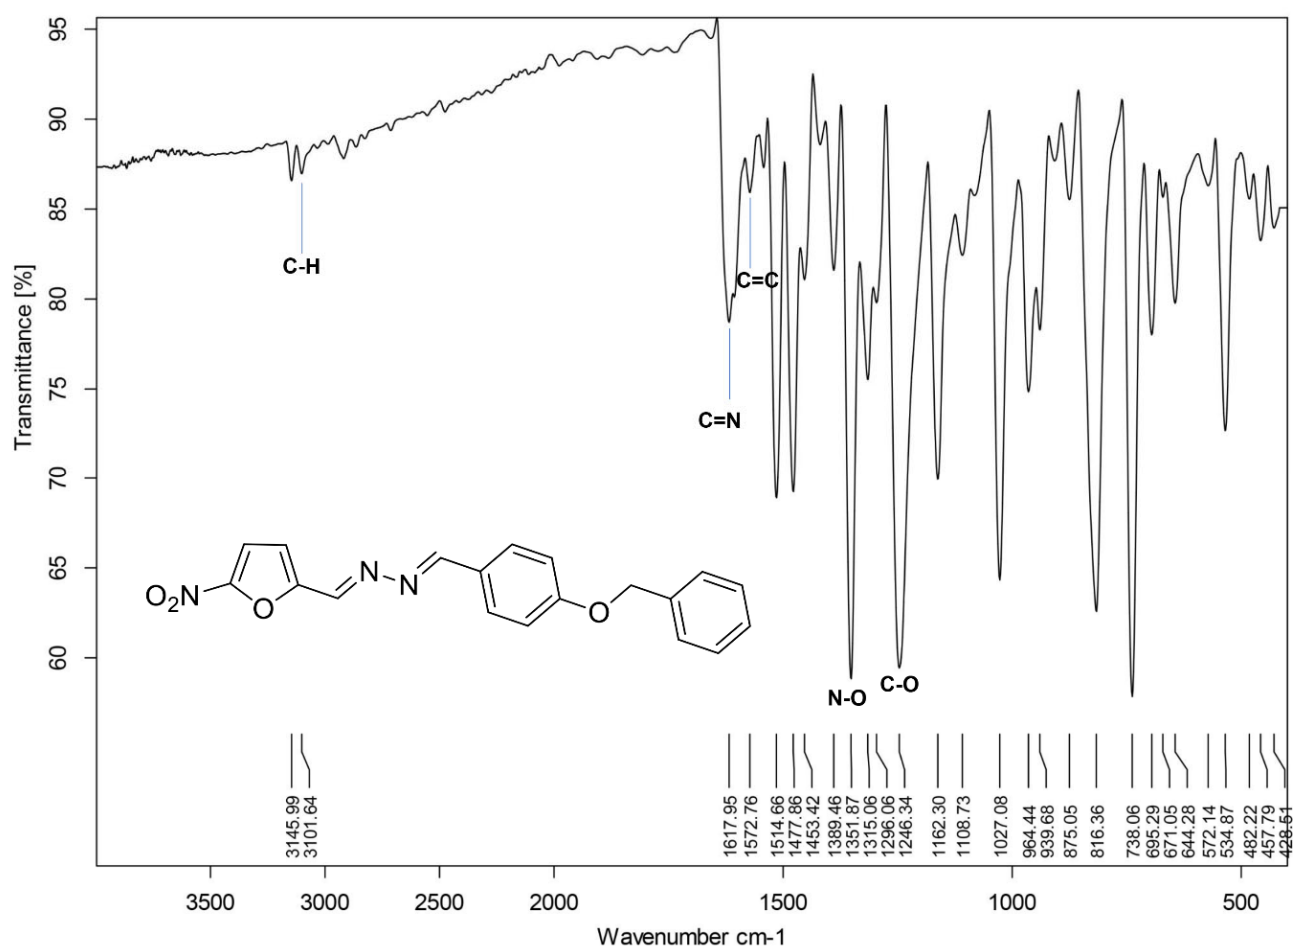

## HRMS

## Acquisition Parameter

|             |            |                       |           |                  |           |
|-------------|------------|-----------------------|-----------|------------------|-----------|
| Source Type | APCI       | Ion Polarity          | Positive  | Set Nebulizer    | 1.6 Bar   |
| Focus       | Not active | Set Capillary         | 4500 V    | Set Dry Heater   | 200 °C    |
| Scan Begin  | 50 m/z     | Set End Plate Offset  | -500 V    | Set Dry Gas      | 8.0 l/min |
| Scan End    | 1600 m/z   | Set Collision Cell RF | 100.0 Vpp | Set Divert Valve | Waste     |

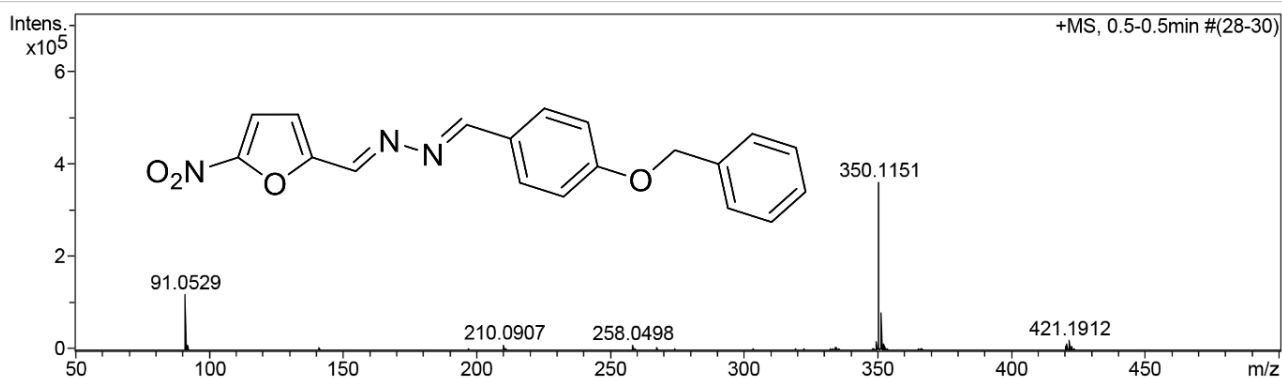

| Meas. m/z | # | Formula           | Score  | m/z      | err [mDa] | err [ppm] | mSigma | rdb  | e <sup>-</sup> Conf | N-Rule |
|-----------|---|-------------------|--------|----------|-----------|-----------|--------|------|---------------------|--------|
| 91.0529   | 1 | C 7 H 7           | 100.00 | 91.0542  | 1.4       | 15.1      | 1.9    | 4.5  | even                | ok     |
| 350.1151  | 1 | C 19 H 16 N 3 O 4 | 100.00 | 350.1135 | -1.6      | -4.5      | 2.3    | 13.5 | even                | ok     |

## 4-((E)-{(E)-[(5-Nitrofuran-2-yl)methylene]hydrazono)methyl}phenol (8a)

 $^1\text{H}$  NMR in DMSO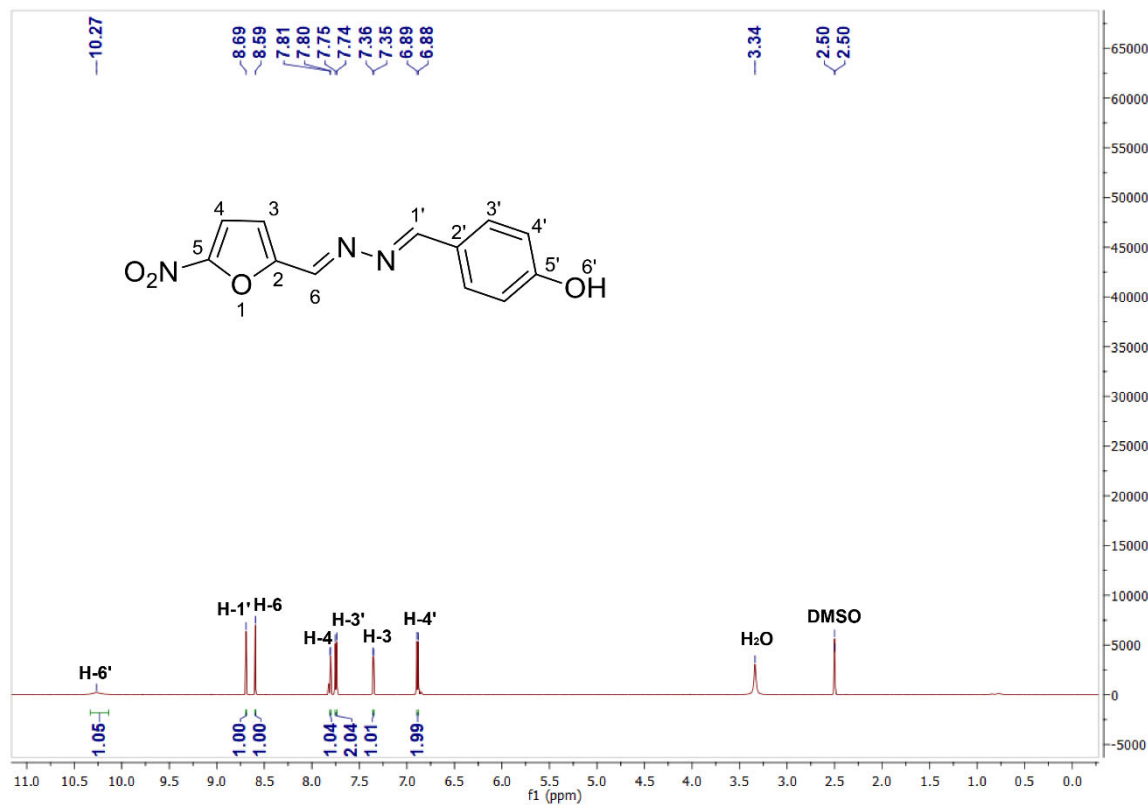 $^{13}\text{C}$  NMR in DMSO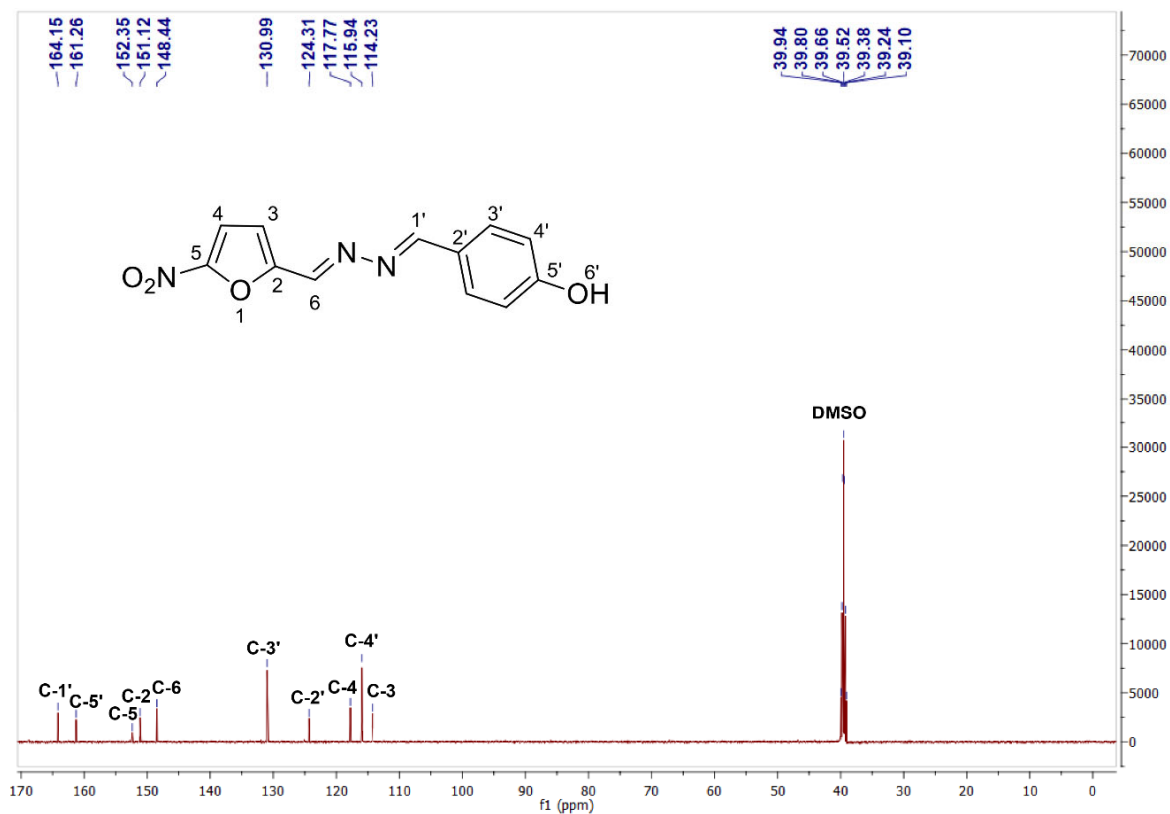

## IR Spectrum

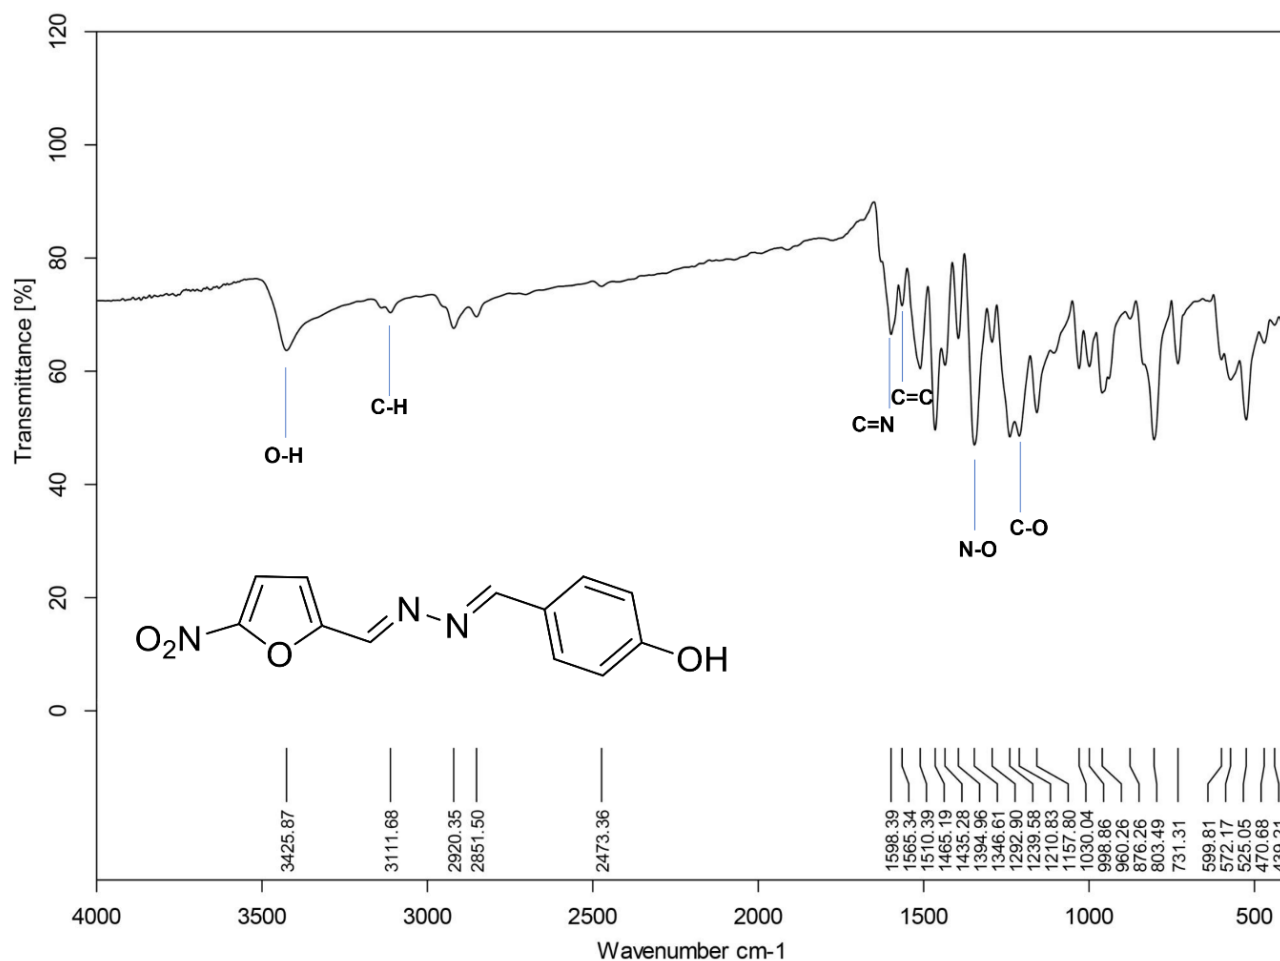

## HRMS

## Acquisition Parameter

|             |            |                       |           |                  |           |
|-------------|------------|-----------------------|-----------|------------------|-----------|
| Source Type | APCI       | Ion Polarity          | Positive  | Set Nebulizer    | 1.6 Bar   |
| Focus       | Not active | Set Capillary         | 4500 V    | Set Dry Heater   | 200 °C    |
| Scan Begin  | 50 m/z     | Set End Plate Offset  | -500 V    | Set Dry Gas      | 8.0 l/min |
| Scan End    | 1600 m/z   | Set Collision Cell RF | 100.0 Vpp | Set Divert Valve | Waste     |

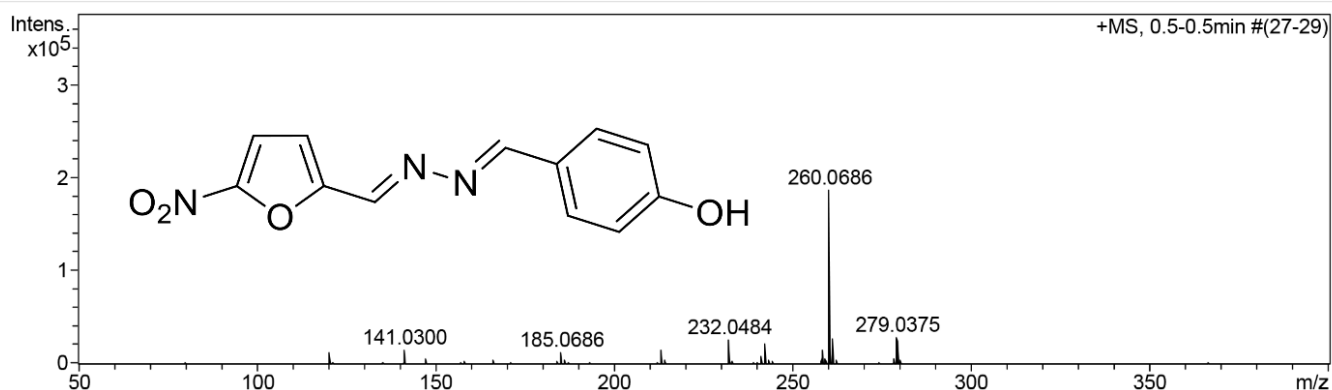

| Meas. m/z | # | Formula                                                       | Score  | m/z      | err [mDa] | err [ppm] | mSigma | rdb | e <sup>-</sup> Conf | N-Rule |
|-----------|---|---------------------------------------------------------------|--------|----------|-----------|-----------|--------|-----|---------------------|--------|
| 260.0686  | 1 | C <sub>12</sub> H <sub>10</sub> N <sub>3</sub> O <sub>4</sub> | 100.00 | 260.0666 | -2.0      | -7.6      | 6.3    | 9.5 | even                | ok     |

**(1*E*,2*E*)-1-(4-Nitrobenzylidene)-2-[(5-nitrofuran-2-yl)methylene]hydrazine (9a)****<sup>1</sup>H NMR in DMSO**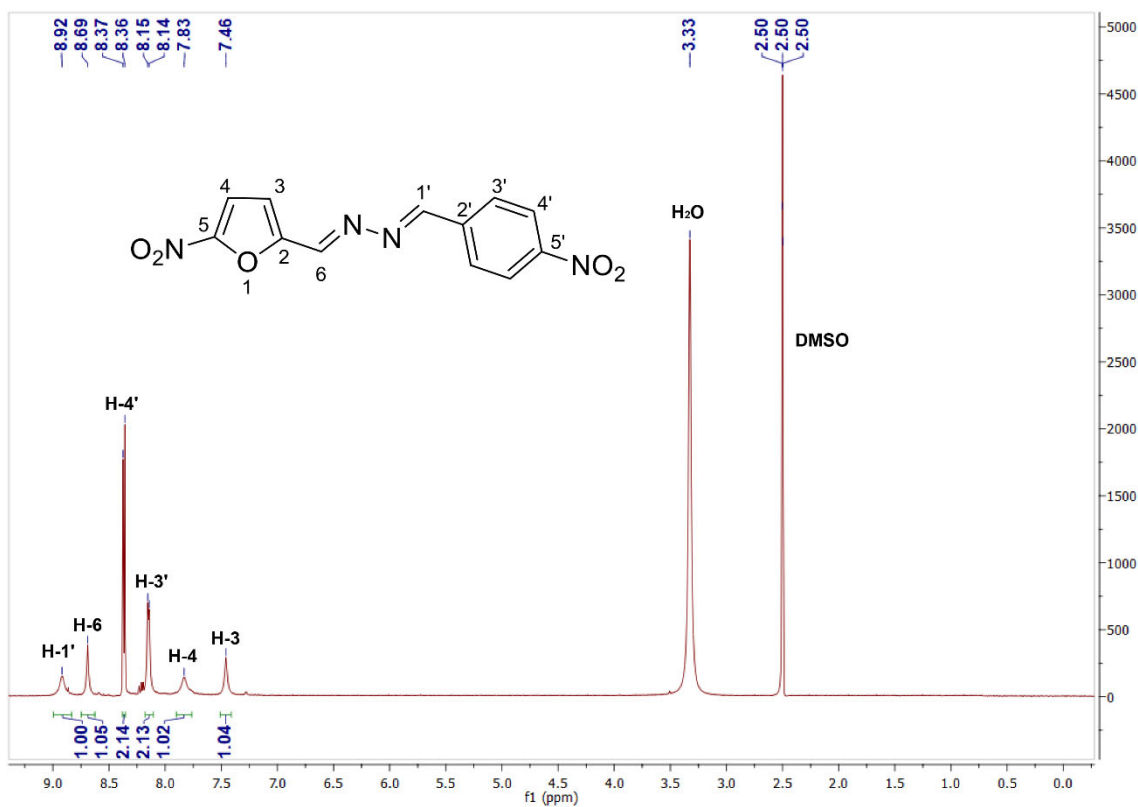**<sup>13</sup>C NMR in DMSO**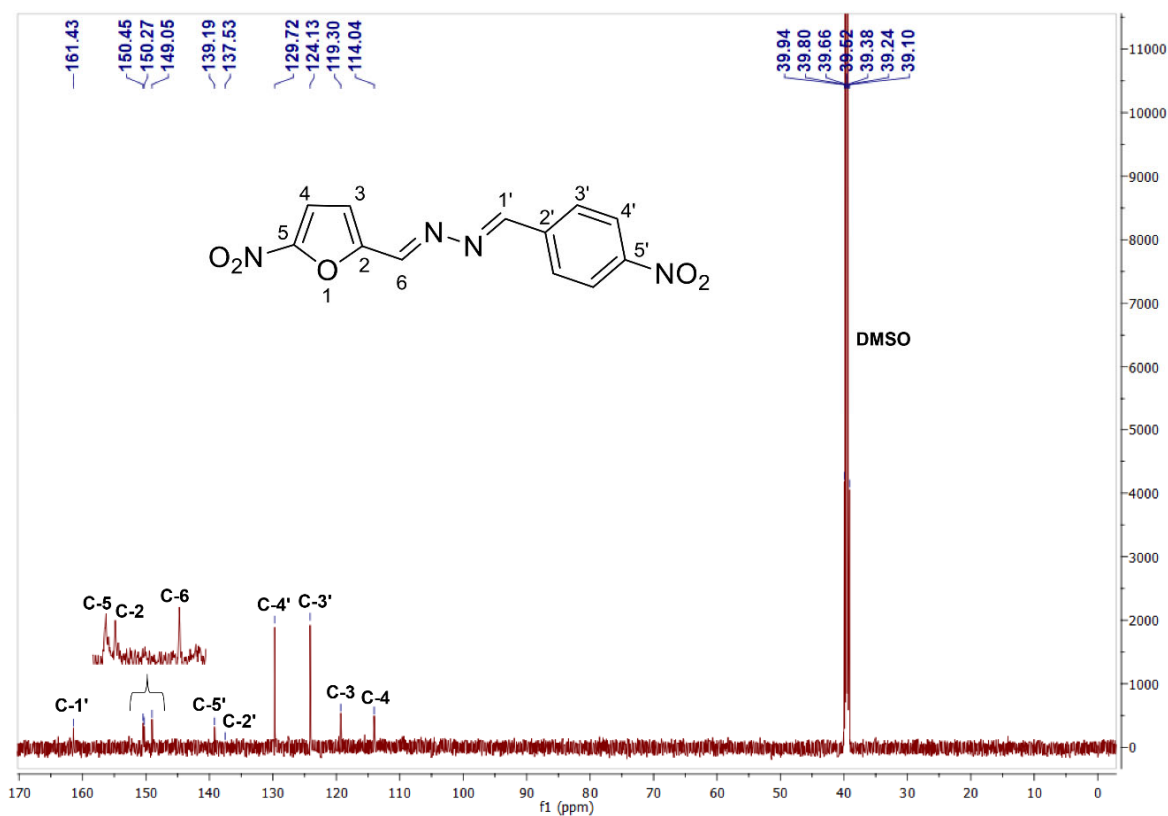

## IR Spectrum

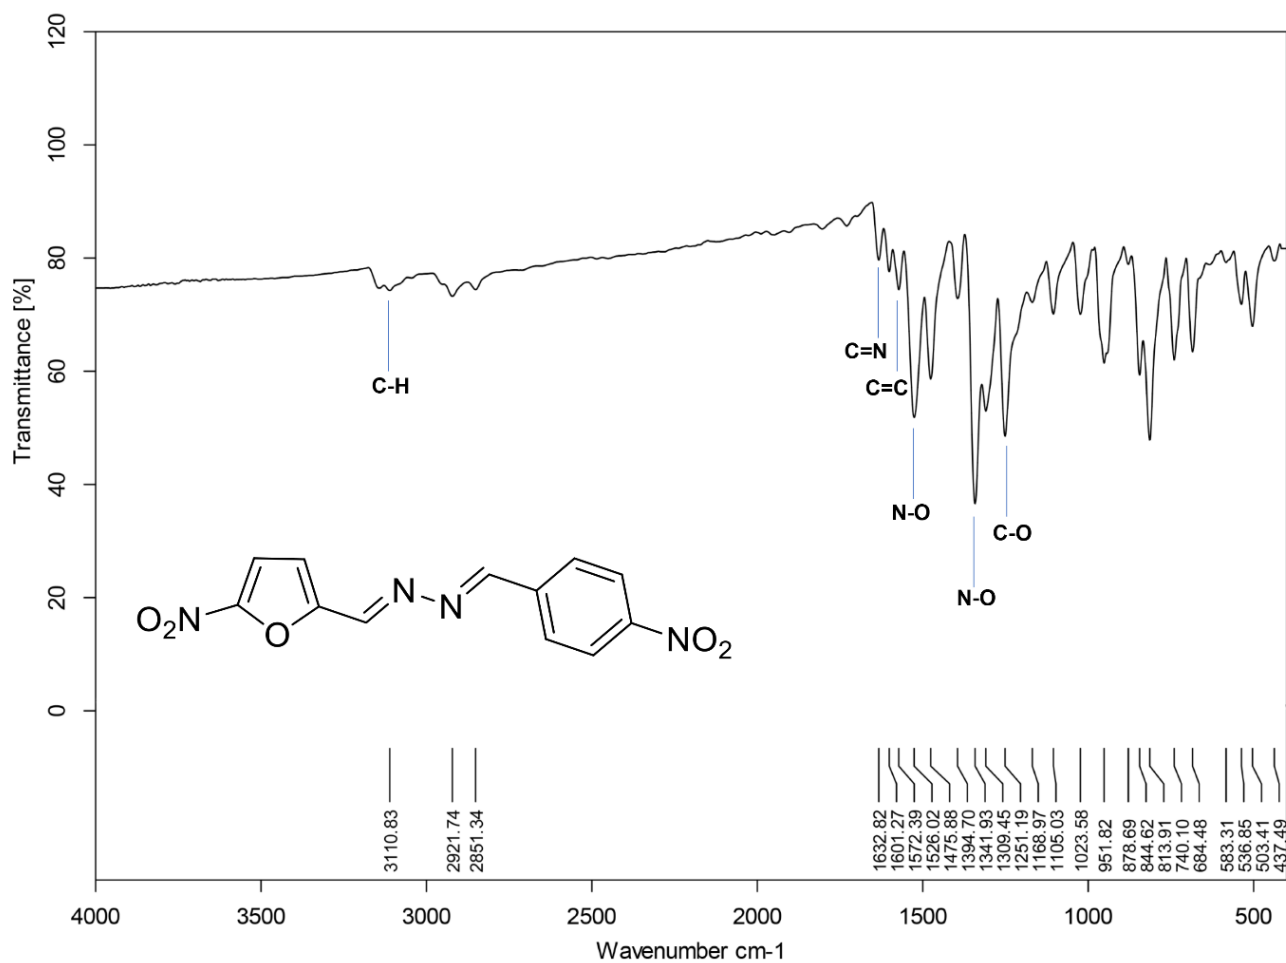

## HRMS

## Acquisition Parameter

|             |            |                       |           |                  |           |
|-------------|------------|-----------------------|-----------|------------------|-----------|
| Source Type | APCI       | Ion Polarity          | Positive  | Set Nebulizer    | 1.6 Bar   |
| Focus       | Not active | Set Capillary         | 4500 V    | Set Dry Heater   | 200 °C    |
| Scan Begin  | 50 m/z     | Set End Plate Offset  | -500 V    | Set Dry Gas      | 8.0 l/min |
| Scan End    | 1600 m/z   | Set Collision Cell RF | 100.0 Vpp | Set Divert Valve | Waste     |

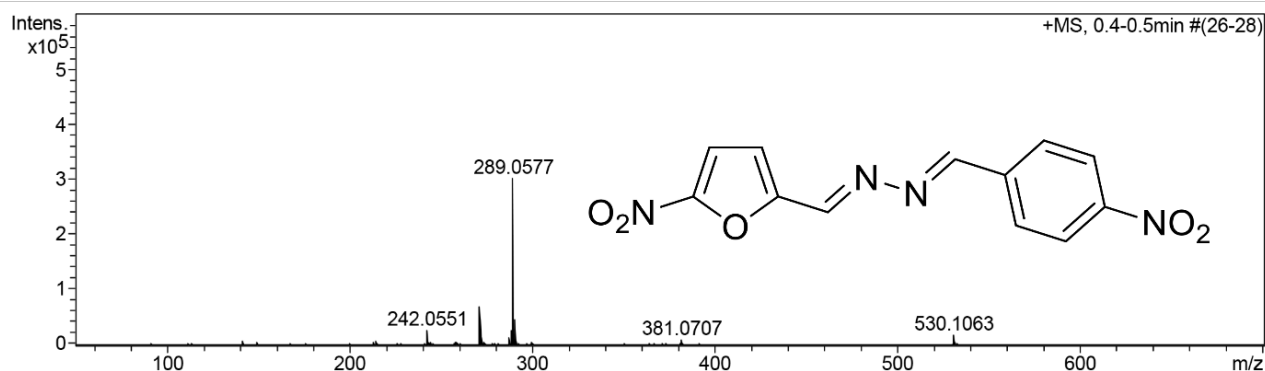

| Meas. m/z | # | Formula                                                      | Score  | m/z      | err [mDa] | err [ppm] | mSigma | rdb  | e <sup>-</sup> Conf | N-Rule |
|-----------|---|--------------------------------------------------------------|--------|----------|-----------|-----------|--------|------|---------------------|--------|
| 271.0462  | 1 | C <sub>12</sub> H <sub>7</sub> N <sub>4</sub> O <sub>4</sub> | 100.00 | 271.0462 | 0.0       | 0.1       | 32.4   | 11.5 | even                | ok     |
| 289.0577  | 1 | C <sub>12</sub> H <sub>9</sub> N <sub>4</sub> O <sub>5</sub> | 100.00 | 289.0567 | -0.9      | -3.2      | 2.1    | 10.5 | even                | ok     |

**(1*E*,2*E*)-1-Benzylidene-2-[(5-nitrothiophen-2-yl)methylene]hydrazine (1b)****<sup>1</sup>H NMR in DMSO**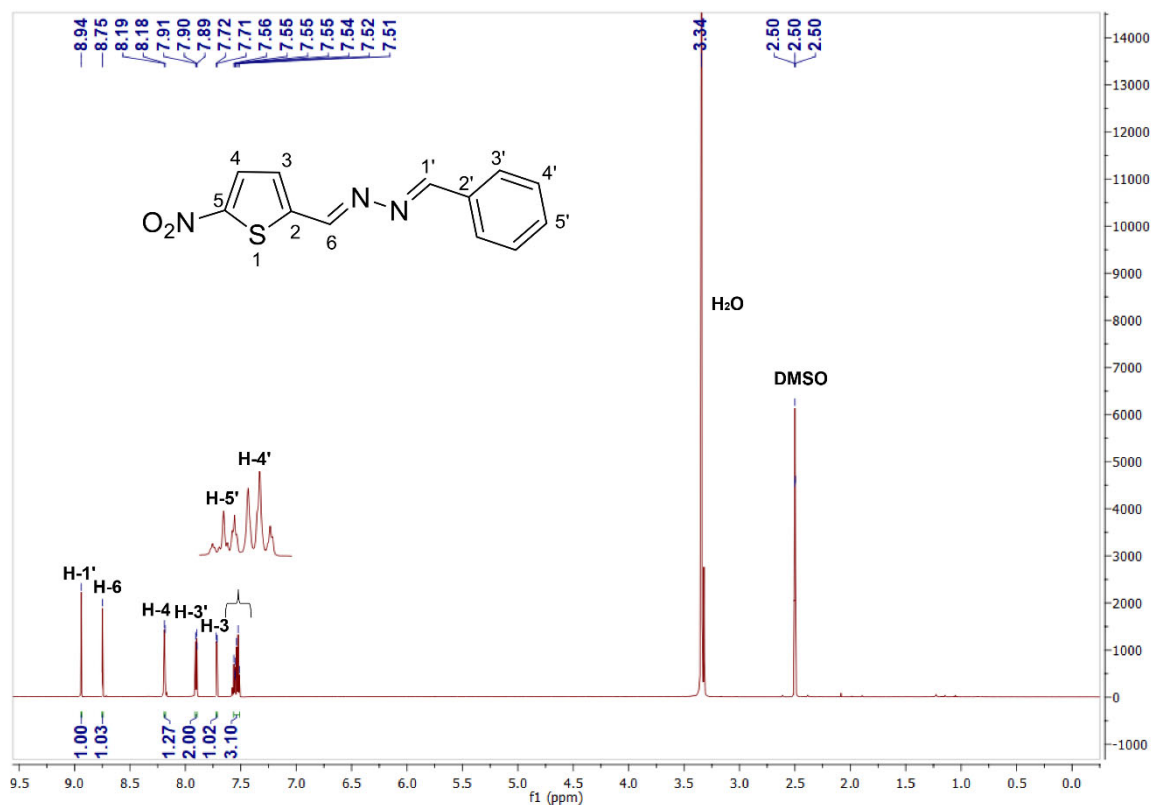**<sup>13</sup>C NMR in DMSO**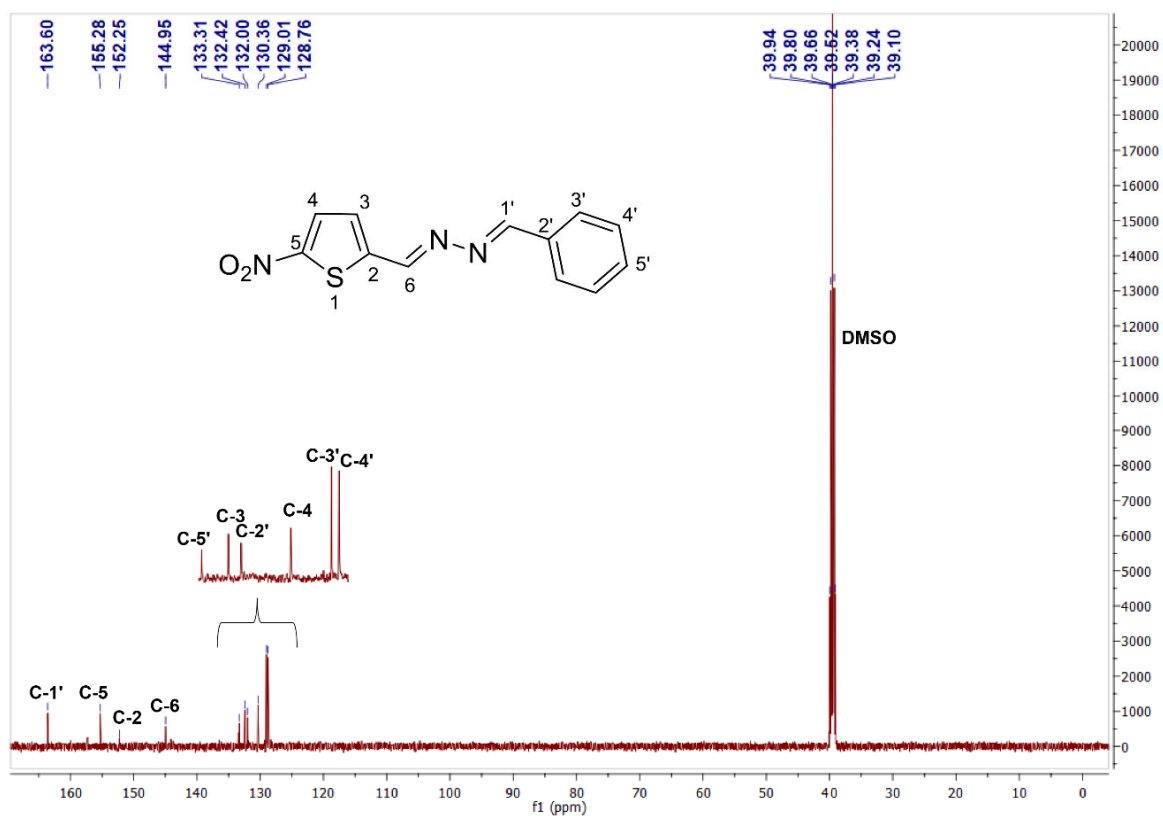

## IR Spectrum

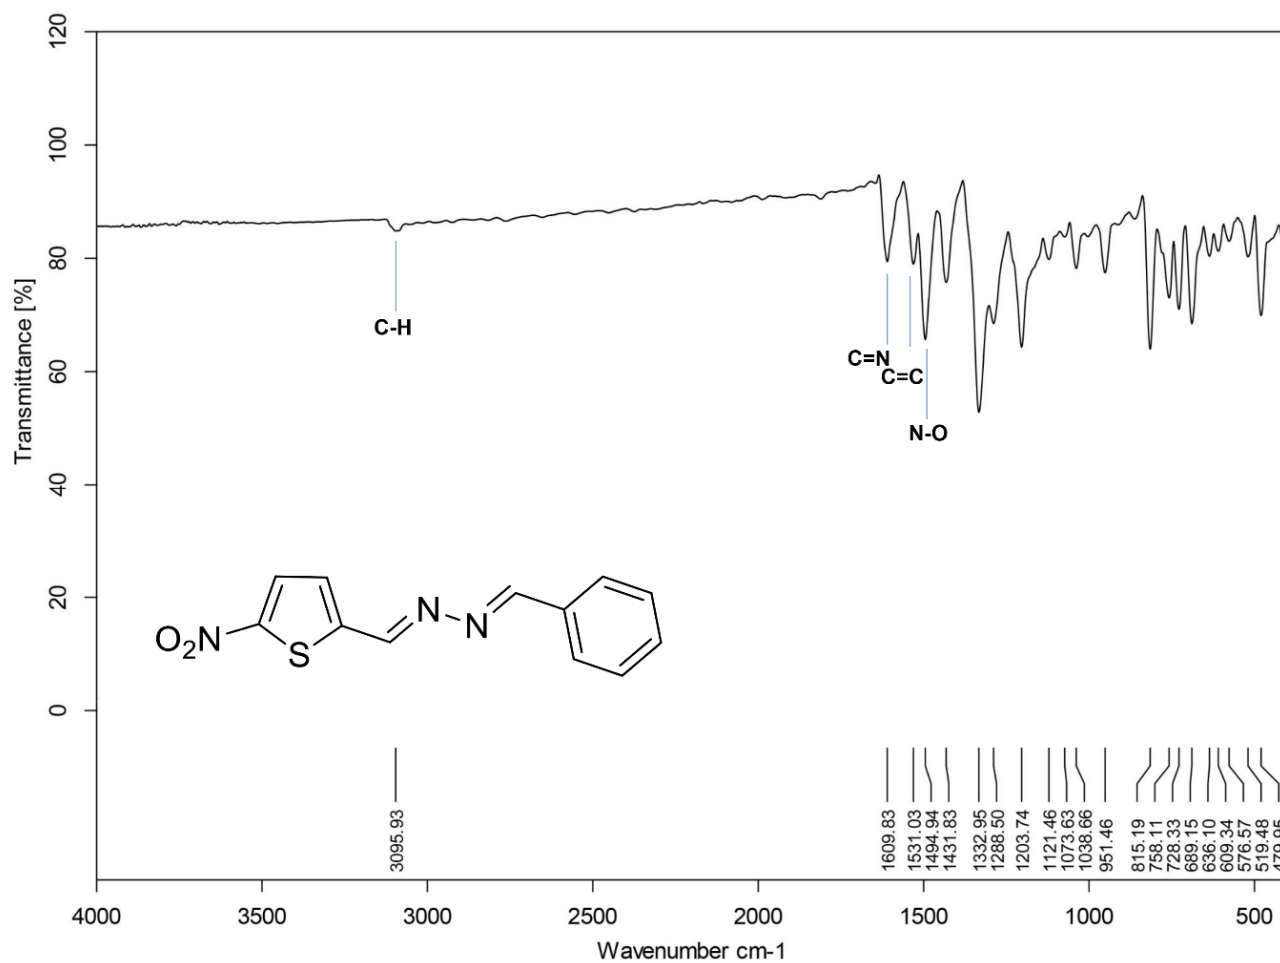

## HRMS

## Acquisition Parameter

|             |            |                       |           |                  |           |
|-------------|------------|-----------------------|-----------|------------------|-----------|
| Source Type | APCI       | Ion Polarity          | Positive  | Set Nebulizer    | 1.6 Bar   |
| Focus       | Not active | Set Capillary         | 4500 V    | Set Dry Heater   | 200 °C    |
| Scan Begin  | 50 m/z     | Set End Plate Offset  | -500 V    | Set Dry Gas      | 8.0 l/min |
| Scan End    | 1600 m/z   | Set Collision Cell RF | 100.0 Vpp | Set Divert Valve | Waste     |

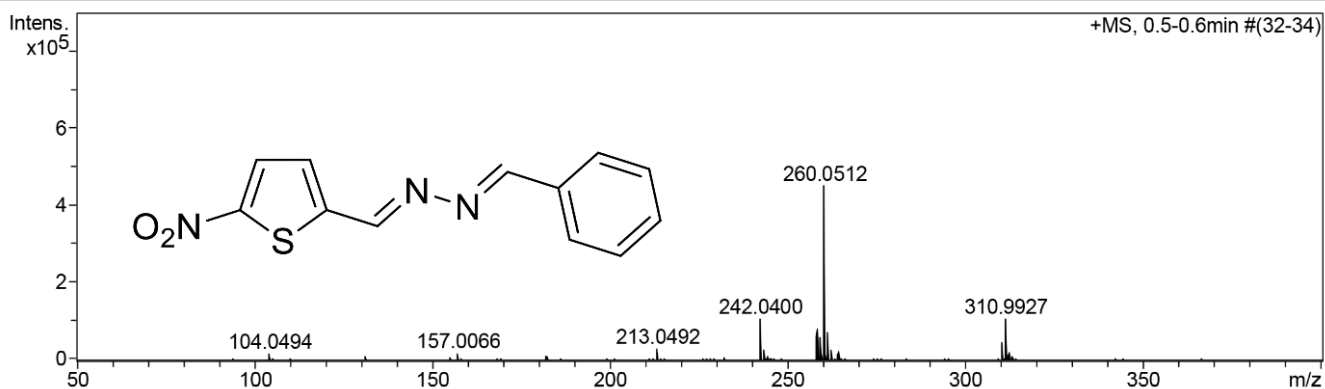

| Meas. m/z | # | Formula             | Score  | m/z      | err [mDa] | err [ppm] | mSigma | rdb | e <sup>-</sup> Conf | N-Rule |
|-----------|---|---------------------|--------|----------|-----------|-----------|--------|-----|---------------------|--------|
| 260.0512  | 1 | C 12 H 10 N 3 O 2 S | 100.00 | 260.0488 | -2.4      | -9.3      | 3.1    | 9.5 | even                | ok     |

**(1E,2E)-1-(4-Fluorobenzylidene)-2-[(5-nitrothiophen-2-yl)methylene]hydrazine (2b)****<sup>1</sup>H NMR in DMSO**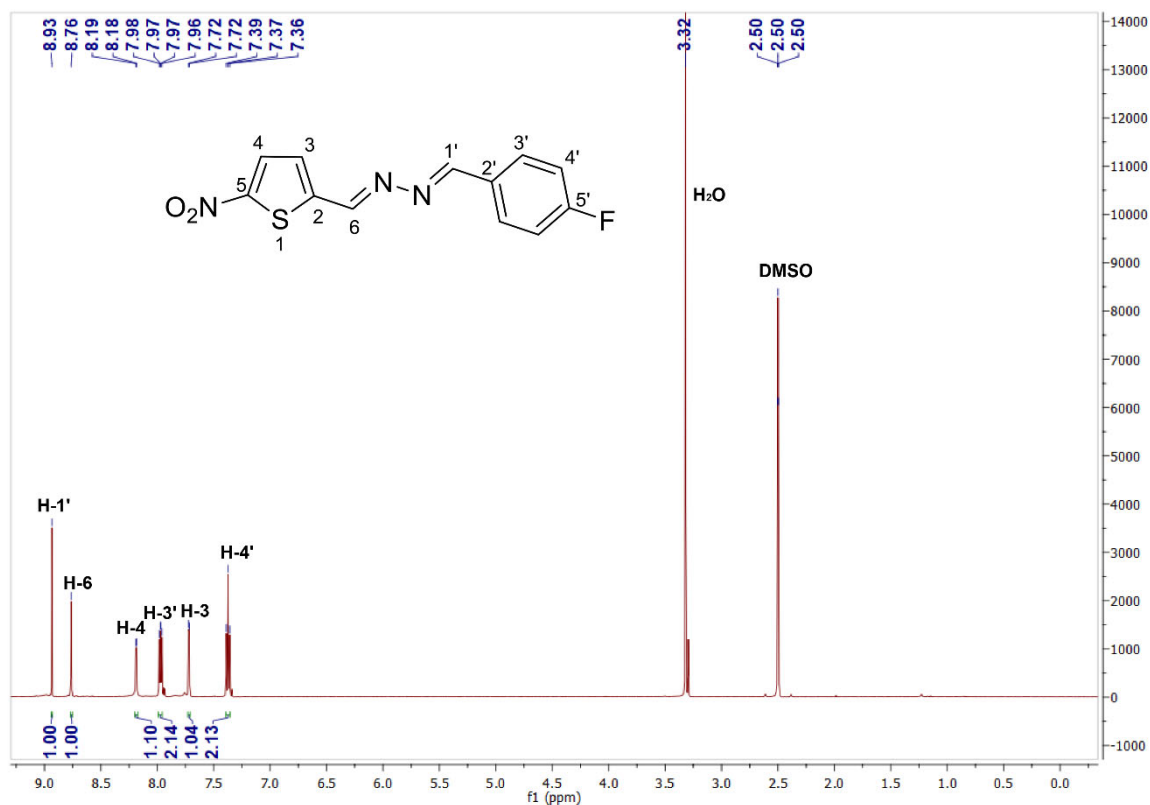**<sup>13</sup>C NMR in DMSO**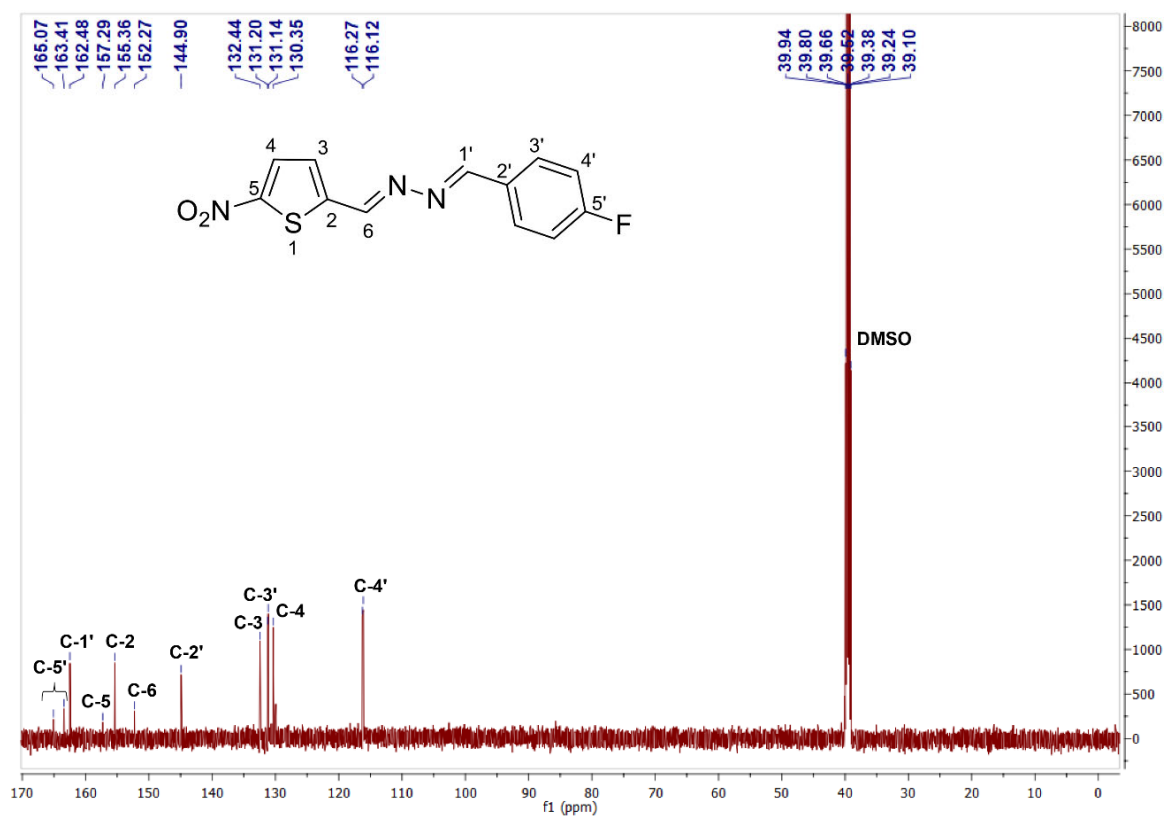



## IR Spectrum

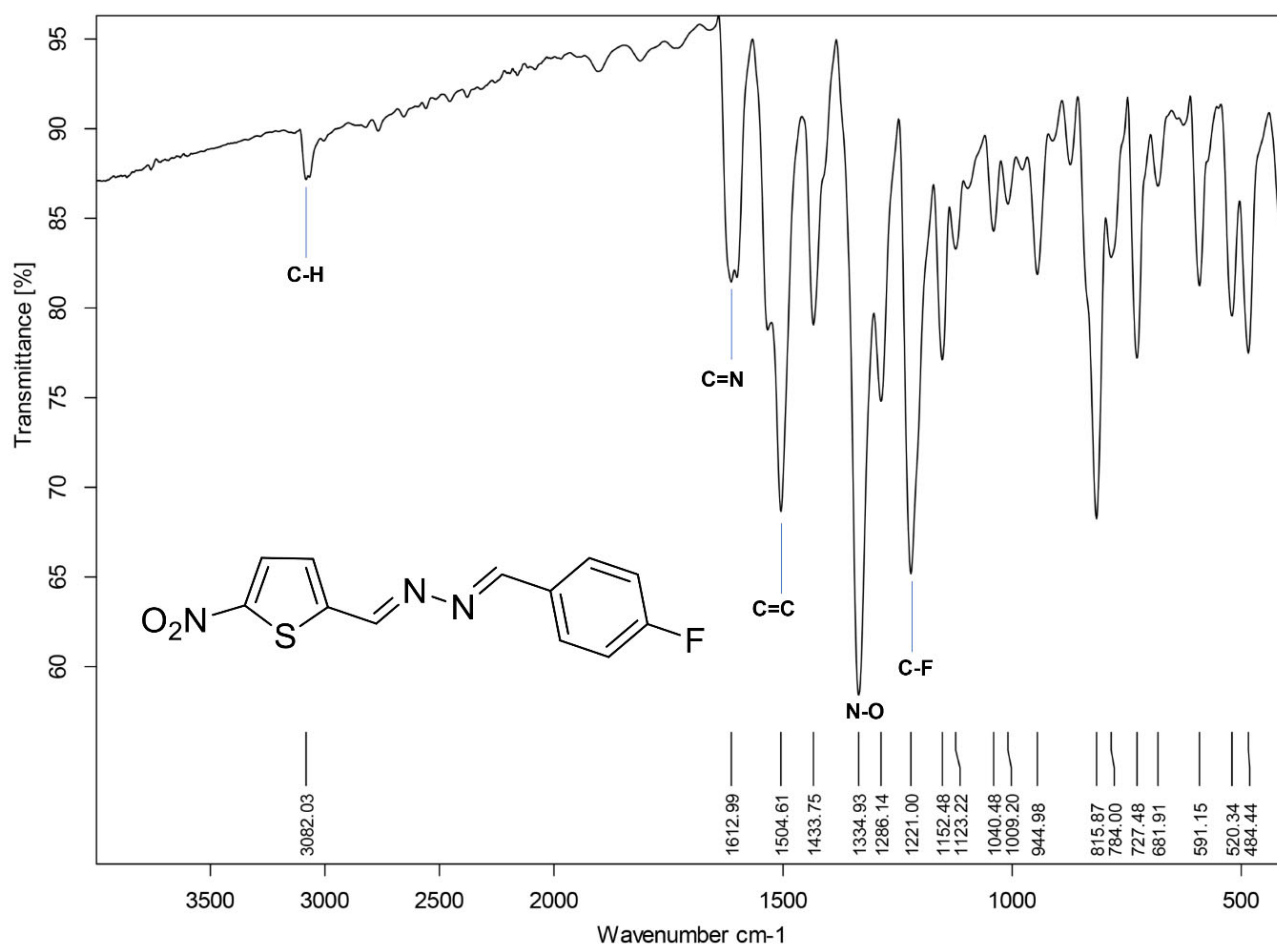

## HRMS

## Acquisition Parameter

|             |            |                       |           |                  |           |
|-------------|------------|-----------------------|-----------|------------------|-----------|
| Source Type | APCI       | Ion Polarity          | Positive  | Set Nebulizer    | 1.6 Bar   |
| Focus       | Not active | Set Capillary         | 4500 V    | Set Dry Heater   | 200 °C    |
| Scan Begin  | 50 m/z     | Set End Plate Offset  | -500 V    | Set Dry Gas      | 8.0 l/min |
| Scan End    | 1600 m/z   | Set Collision Cell RF | 100.0 Vpp | Set Divert Valve | Waste     |

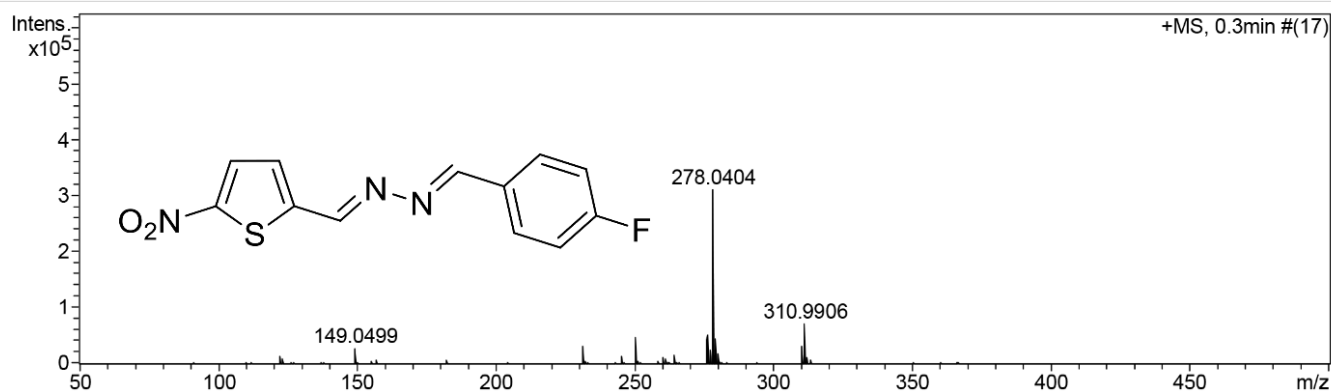

| Meas. m/z | # | Formula                                                         | Score  | m/z      | err [mDa] | err [ppm] | mSigma | rdb | e <sup>-</sup> Conf | N-Rule |
|-----------|---|-----------------------------------------------------------------|--------|----------|-----------|-----------|--------|-----|---------------------|--------|
| 278.0404  | 1 | C <sub>12</sub> H <sub>9</sub> FN <sub>3</sub> O <sub>2</sub> S | 100.00 | 278.0394 | -1.0      | -3.5      | 0.9    | 9.5 | even                | ok     |

**(1E,2E)-1-(4-Chlorobenzylidene)-2-[(5-nitrothiophen-2-yl)methylene]hydrazine (3b)****<sup>1</sup>H NMR in DMSO**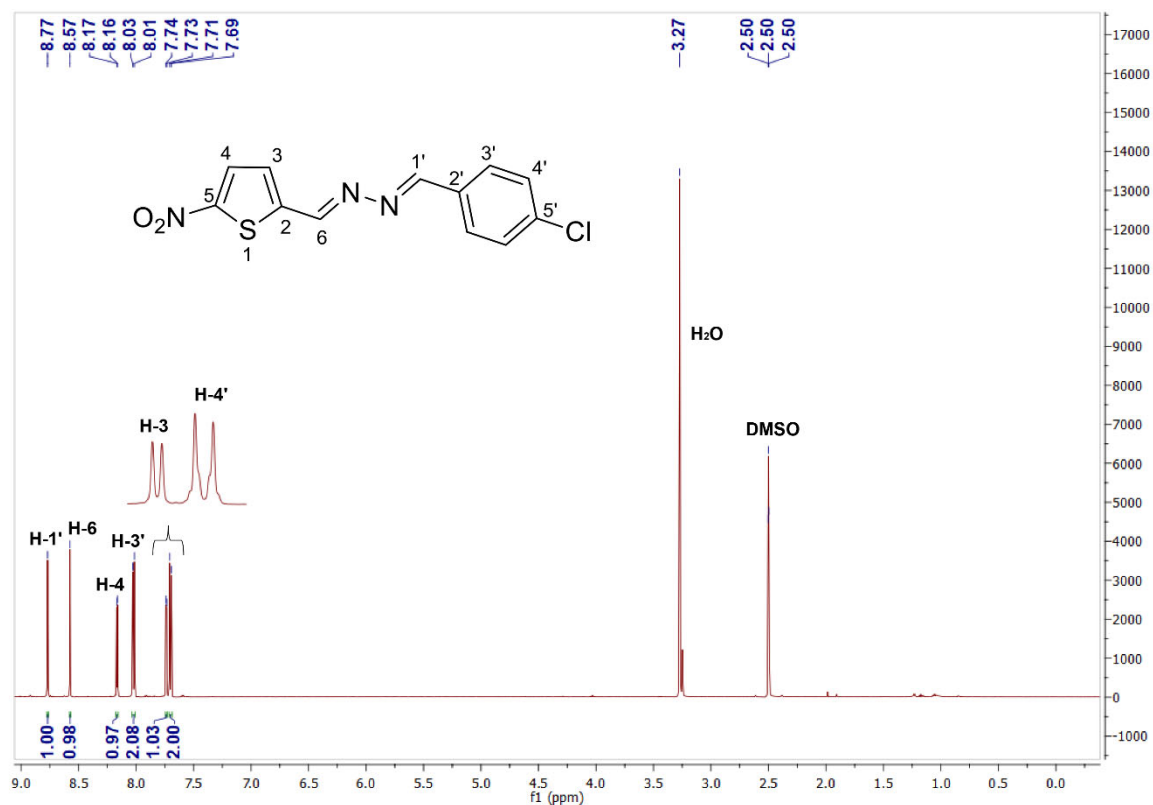**<sup>13</sup>C NMR in DMSO**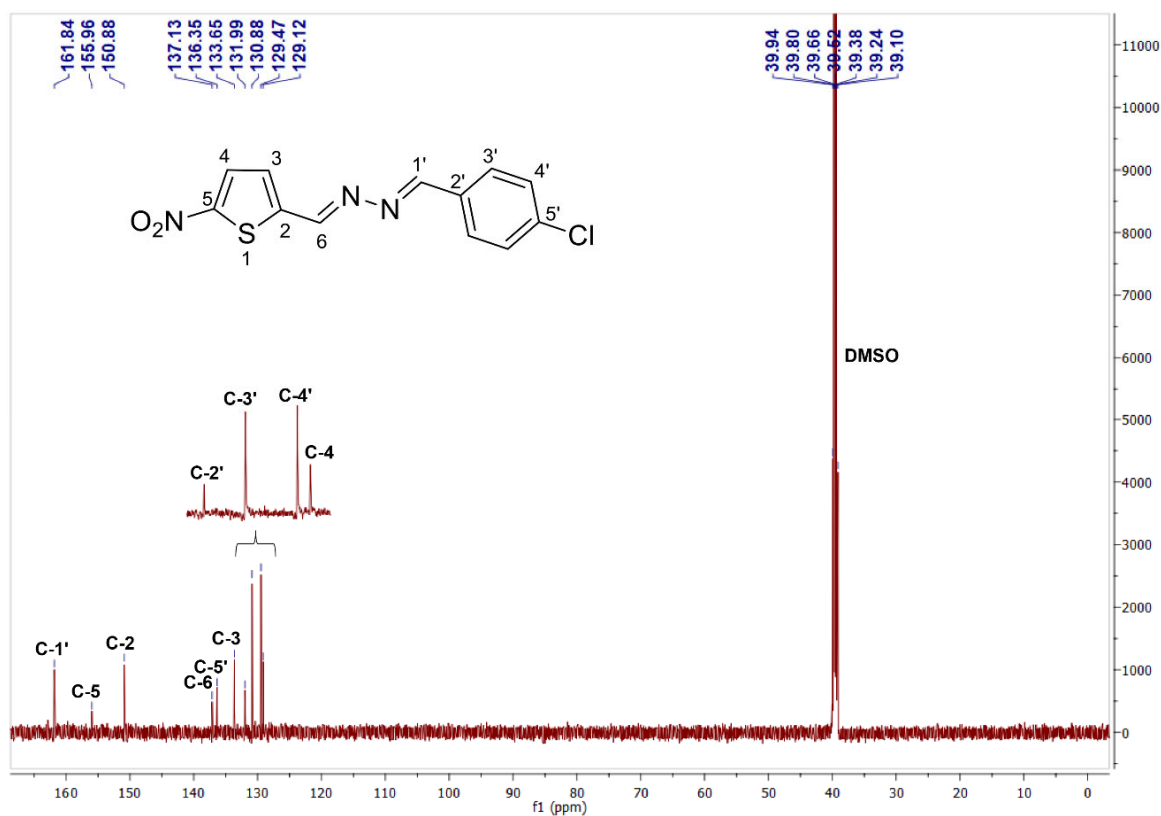

## IR Spectrum

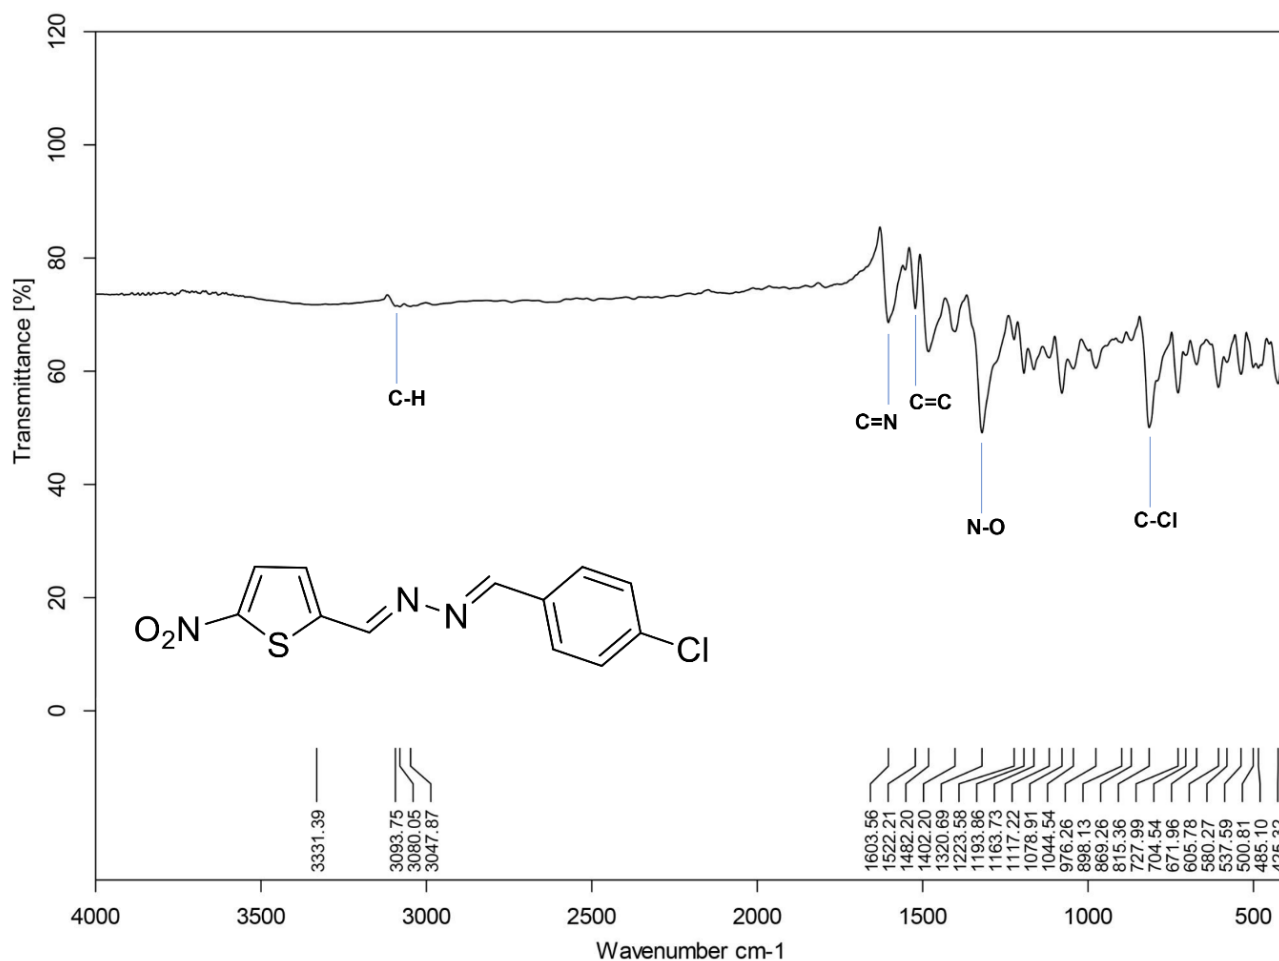

## HRMS

## Acquisition Parameter

|             |            |                       |           |                  |           |
|-------------|------------|-----------------------|-----------|------------------|-----------|
| Source Type | APCI       | Ion Polarity          | Positive  | Set Nebulizer    | 1.6 Bar   |
| Focus       | Not active | Set Capillary         | 4500 V    | Set Dry Heater   | 200 °C    |
| Scan Begin  | 50 m/z     | Set End Plate Offset  | -500 V    | Set Dry Gas      | 8.0 l/min |
| Scan End    | 1600 m/z   | Set Collision Cell RF | 100.0 Vpp | Set Divert Valve | Waste     |

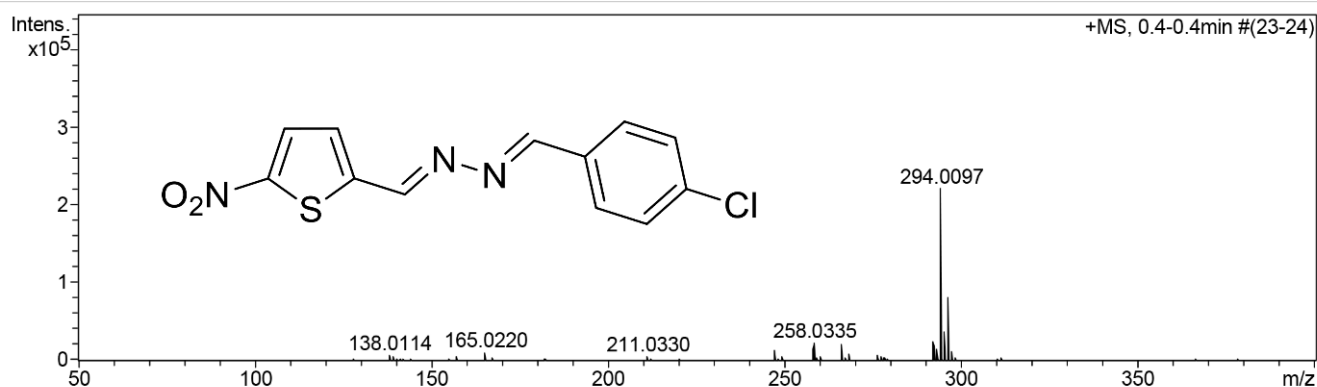

| Meas. $m/z$ | # | Formula                                                  | Score  | $m/z$    | err [mDa] | err [ppm] | mSigma | rdb | $e^-$ Conf | N-Rule |
|-------------|---|----------------------------------------------------------|--------|----------|-----------|-----------|--------|-----|------------|--------|
| 294.0097    | 1 | $\text{C}_{12}\text{H}_9\text{ClIN}_3\text{O}_2\text{S}$ | 100.00 | 294.0099 | 0.2       | 0.6       | 8.0    | 9.5 | even       | ok     |

**(1E,2E)-1-(4-Bromobenzylidene)-2-[(5-nitrothiophen-2-yl)methylene]hydrazine (4b)****<sup>1</sup>H NMR in DMSO**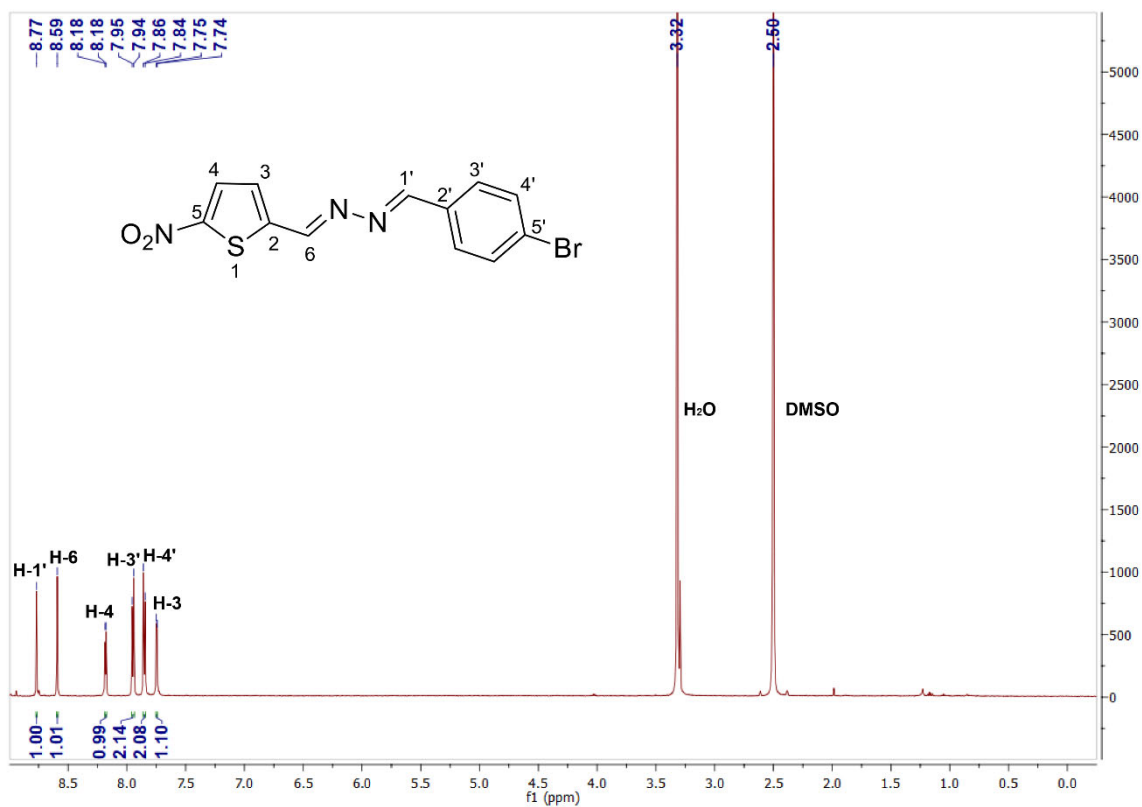**<sup>13</sup>C NMR in DMSO**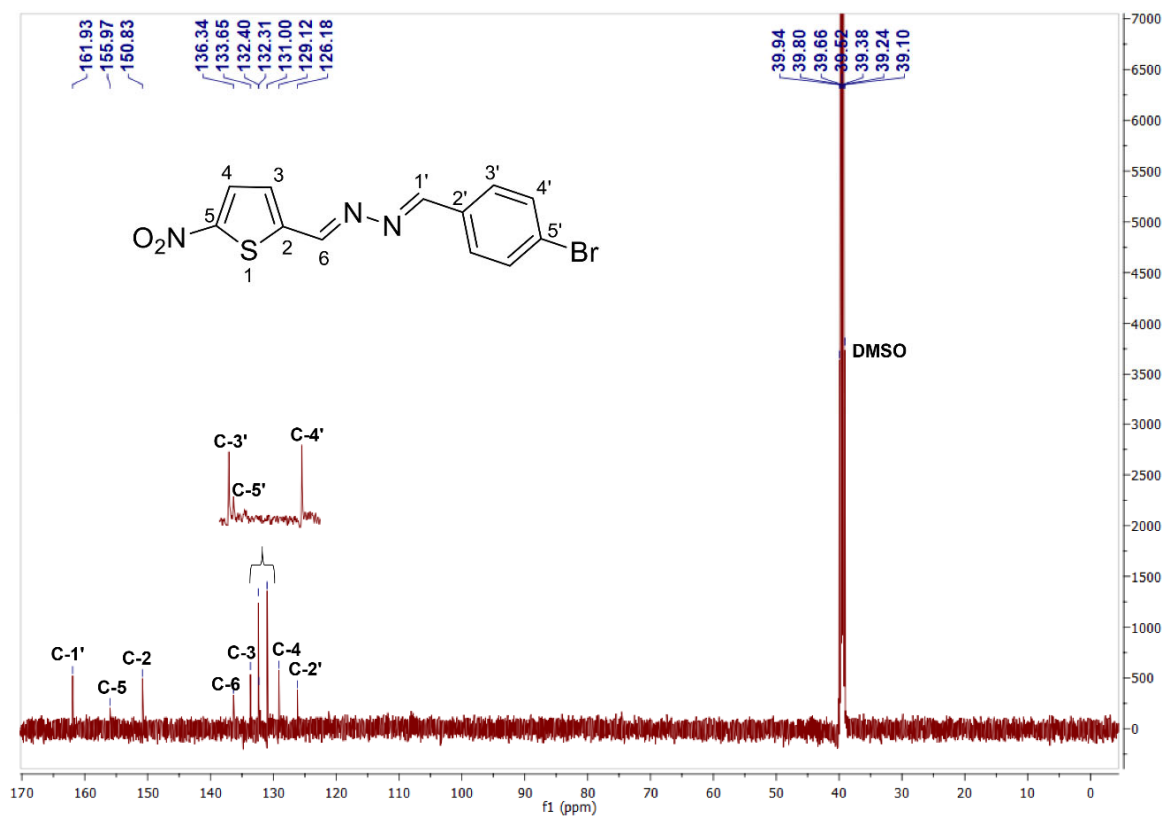

## IR Spectrum

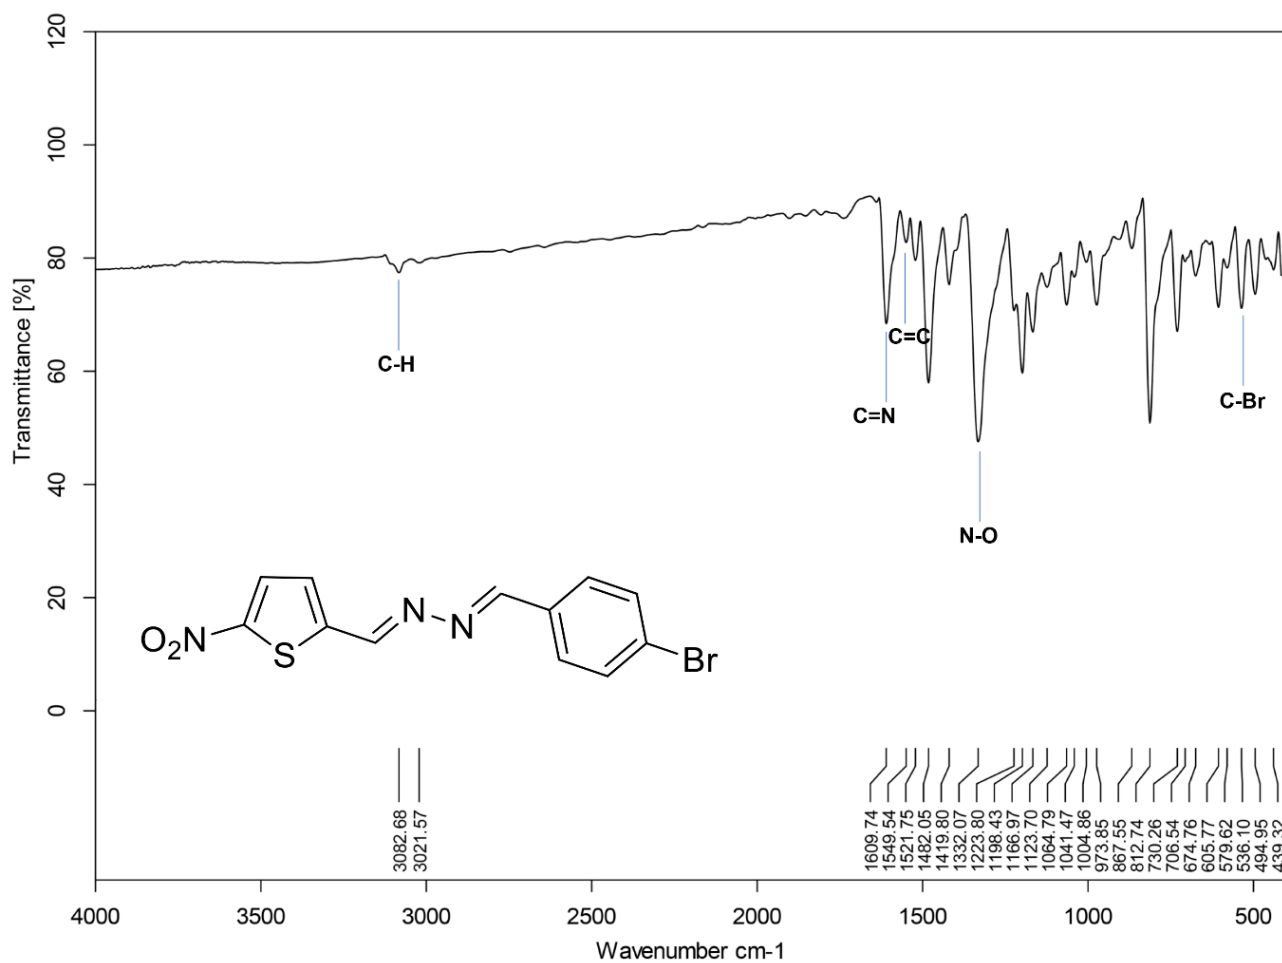

## HRMS

## Acquisition Parameter

|             |            |                       |           |                  |           |
|-------------|------------|-----------------------|-----------|------------------|-----------|
| Source Type | APCI       | Ion Polarity          | Positive  | Set Nebulizer    | 1.6 Bar   |
| Focus       | Not active | Set Capillary         | 4500 V    | Set Dry Heater   | 200 °C    |
| Scan Begin  | 50 m/z     | Set End Plate Offset  | -500 V    | Set Dry Gas      | 8.0 l/min |
| Scan End    | 1600 m/z   | Set Collision Cell RF | 100.0 Vpp | Set Divert Valve | Waste     |

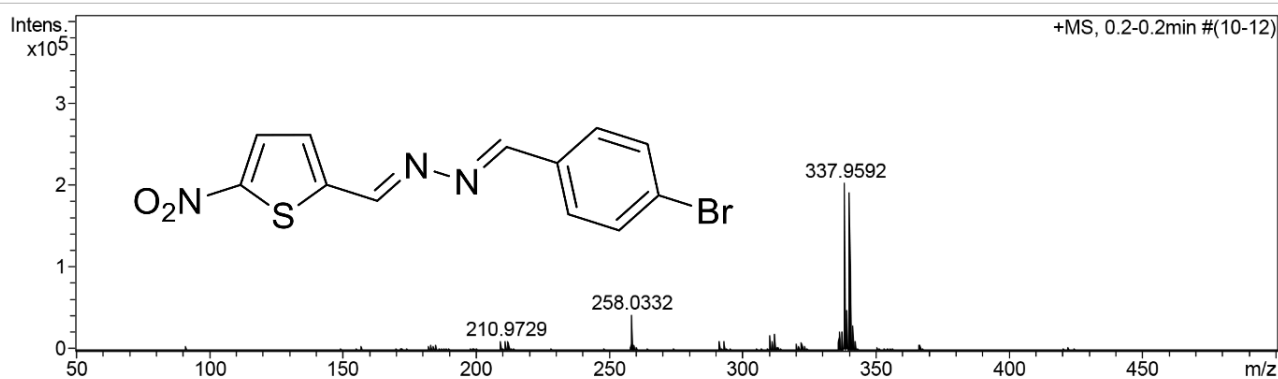

| Meas. m/z | # | Formula               | Score  | m/z      | err [mDa] | err [ppm] | mSigma | rdb | e <sup>-</sup> Conf | N-Rule |
|-----------|---|-----------------------|--------|----------|-----------|-----------|--------|-----|---------------------|--------|
| 337.9592  | 1 | C 14 H 11 Br O 3 S    | 51.79  | 337.9607 | 1.5       | 4.3       | 44.4   | 9.0 | odd                 | ok     |
|           | 2 | C 12 H 9 Br N 3 O 2 S | 100.00 | 337.9593 | 0.1       | 0.4       | 46.5   | 9.5 | even                | ok     |

**(1E,2E)-1-(4-Methylbenzylidene)-2-[(5-nitrothiophen-2-yl)methylene]hydrazine (5b)****<sup>1</sup>H NMR in DMSO**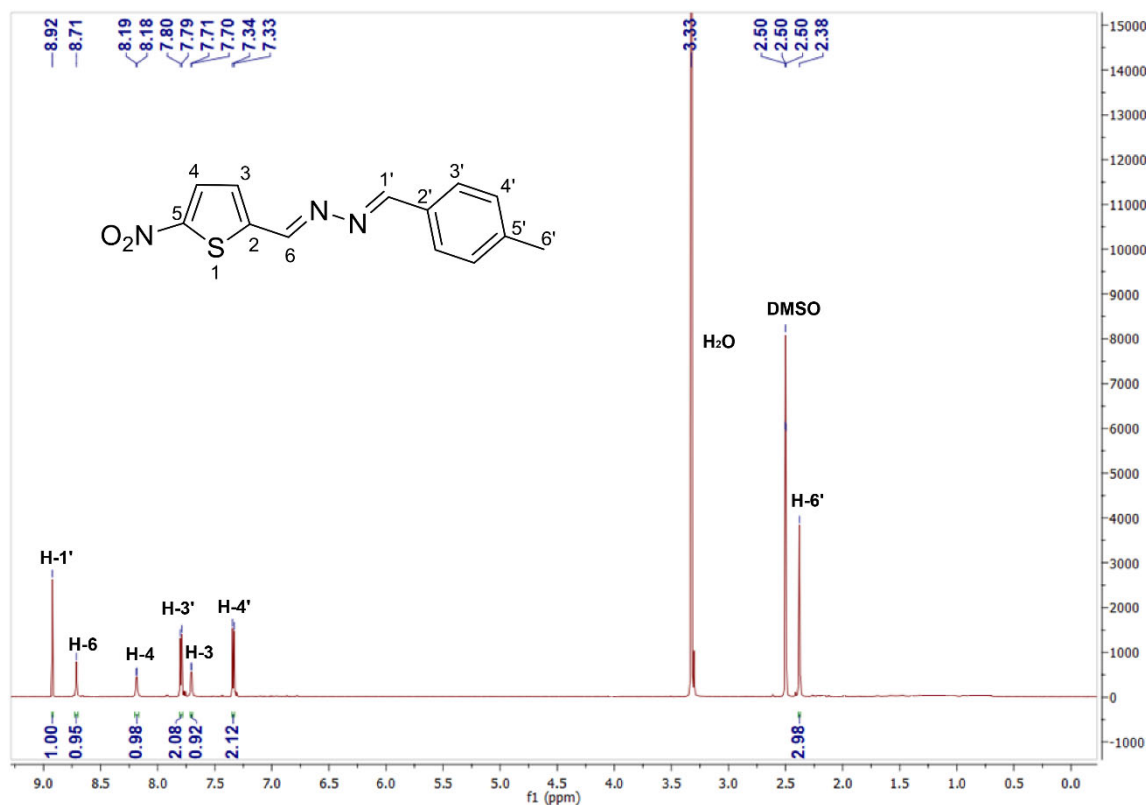**<sup>13</sup>C NMR in DMSO**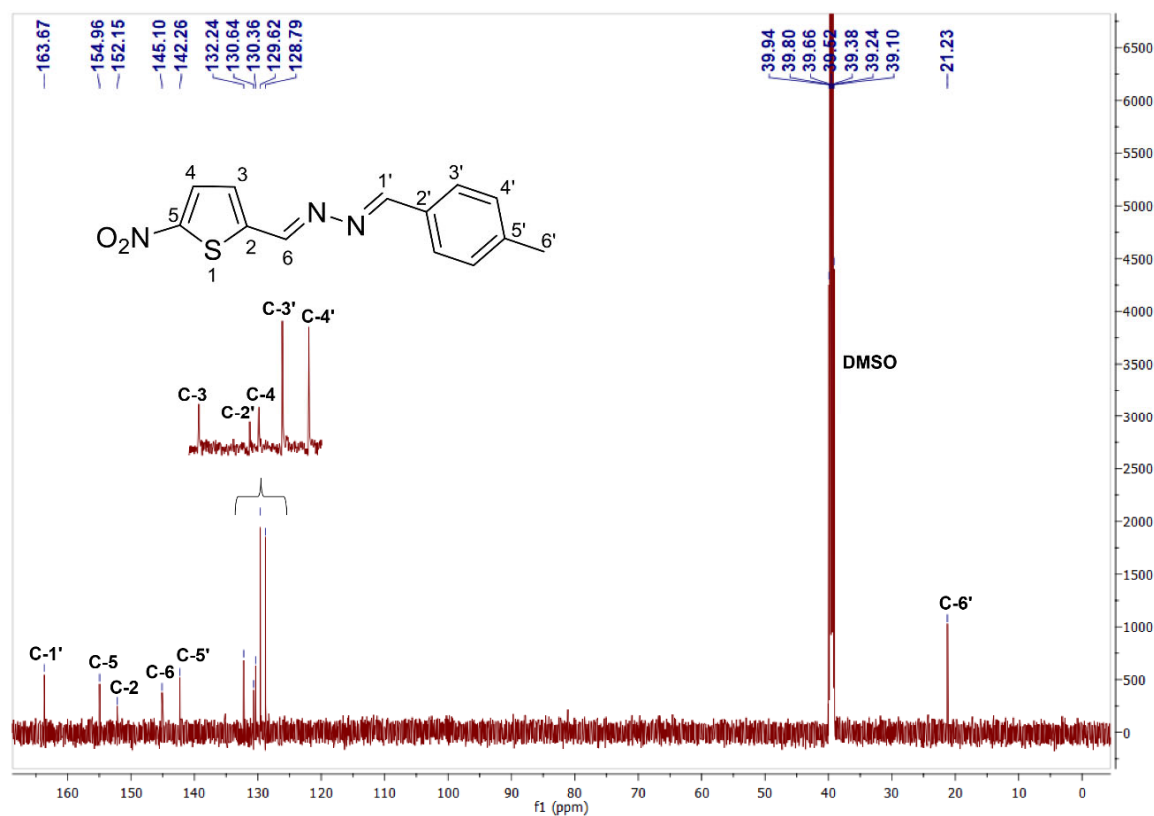

## IR Spectrum

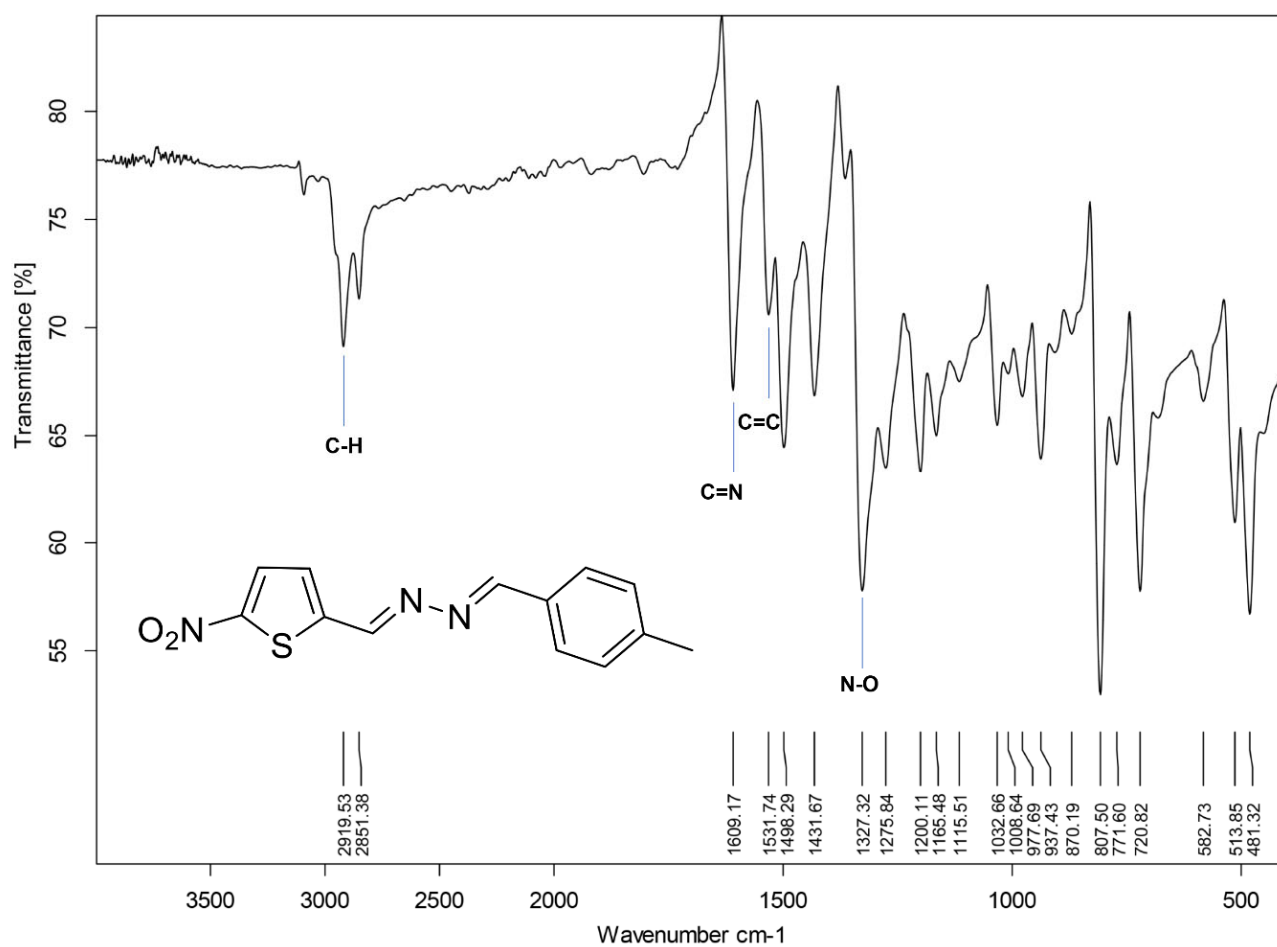

## HRMS

## Acquisition Parameter

|             |            |                       |           |                  |           |
|-------------|------------|-----------------------|-----------|------------------|-----------|
| Source Type | APCI       | Ion Polarity          | Positive  | Set Nebulizer    | 1.6 Bar   |
| Focus       | Not active | Set Capillary         | 4500 V    | Set Dry Heater   | 200 °C    |
| Scan Begin  | 50 m/z     | Set End Plate Offset  | -500 V    | Set Dry Gas      | 8.0 l/min |
| Scan End    | 1600 m/z   | Set Collision Cell RF | 100.0 Vpp | Set Divert Valve | Waste     |

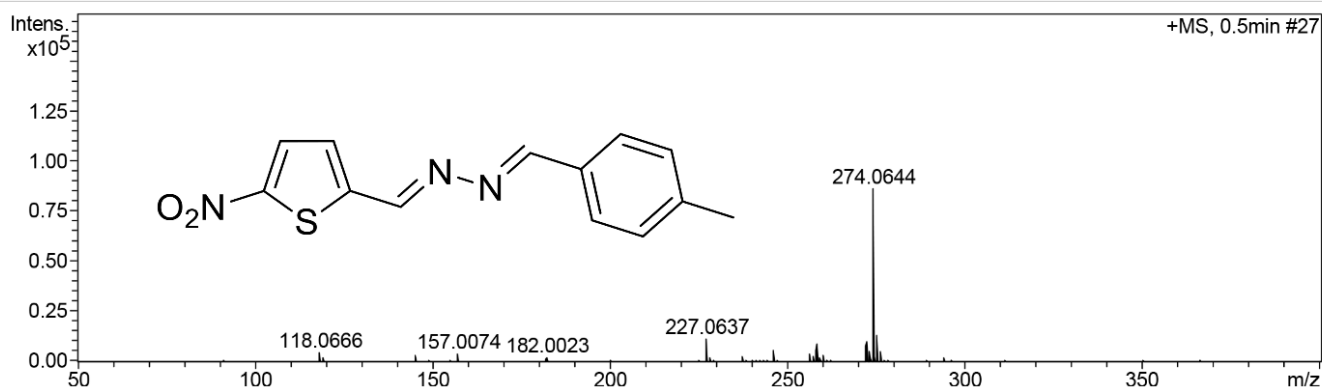

| Meas. m/z | # | Formula                                                         | Score  | m/z      | err [mDa] | err [ppm] | mSigma | rdb | e <sup>-</sup> Conf | N-Rule |
|-----------|---|-----------------------------------------------------------------|--------|----------|-----------|-----------|--------|-----|---------------------|--------|
| 274.0644  | 1 | C <sub>13</sub> H <sub>12</sub> N <sub>3</sub> O <sub>2</sub> S | 100.00 | 274.0645 | 0.1       | 0.3       | 2.0    | 9.5 | even                | ok     |

**(1E,2E)-1-(4-Methoxybenzylidene)-2-[(5-nitrothiophen-2-yl)methylene]hydrazine (6b)****<sup>1</sup>H NMR in DMSO**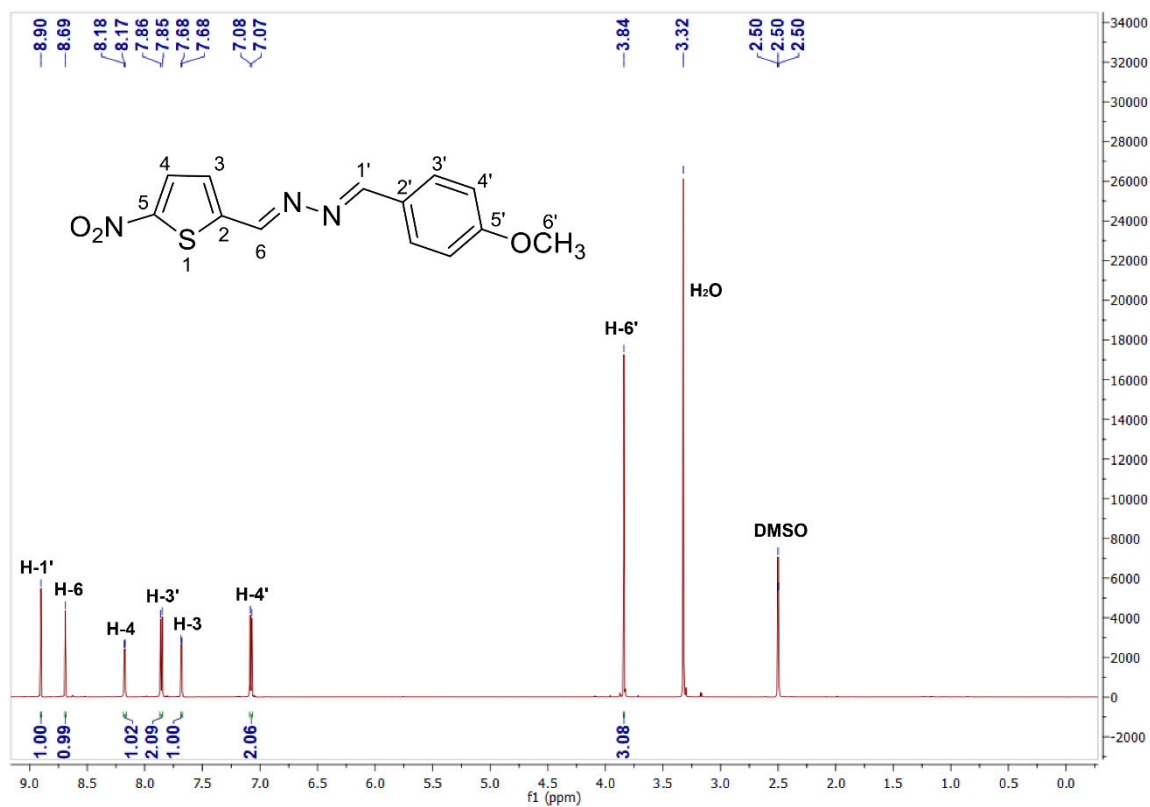**<sup>13</sup>C NMR in DMSO**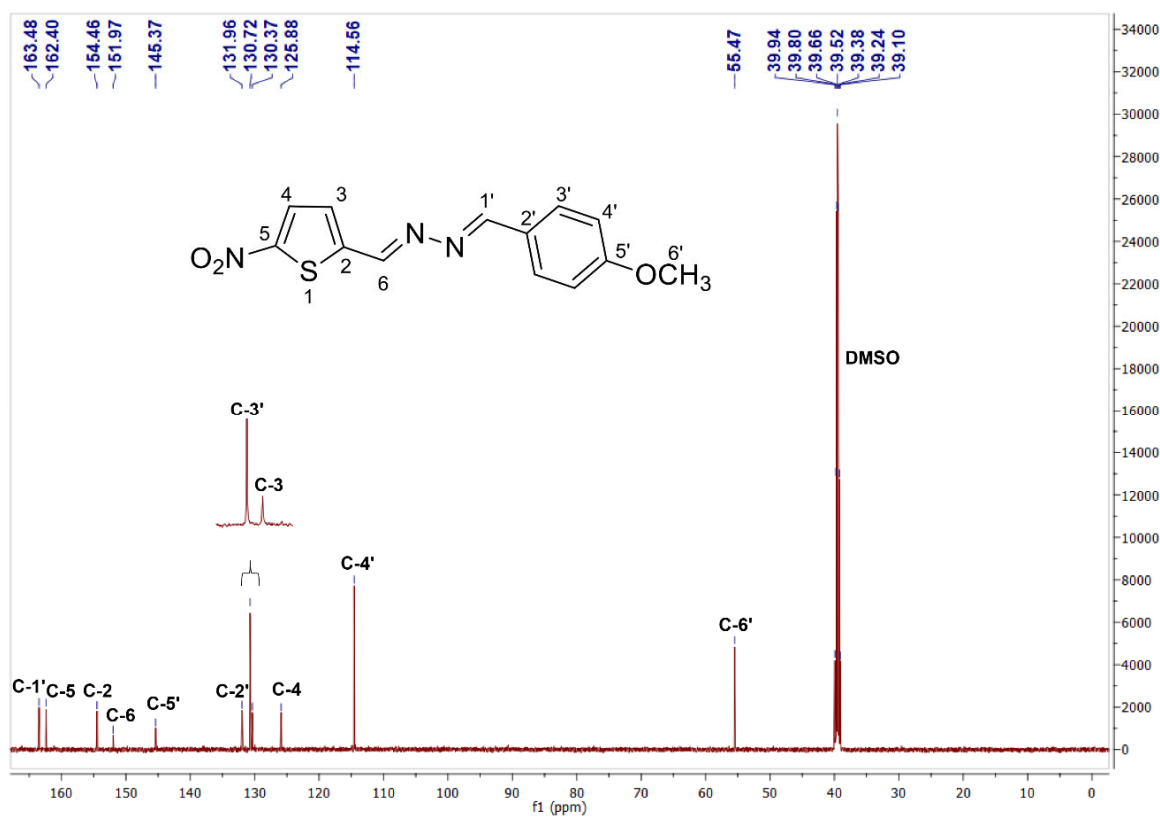



## IR Spectrum

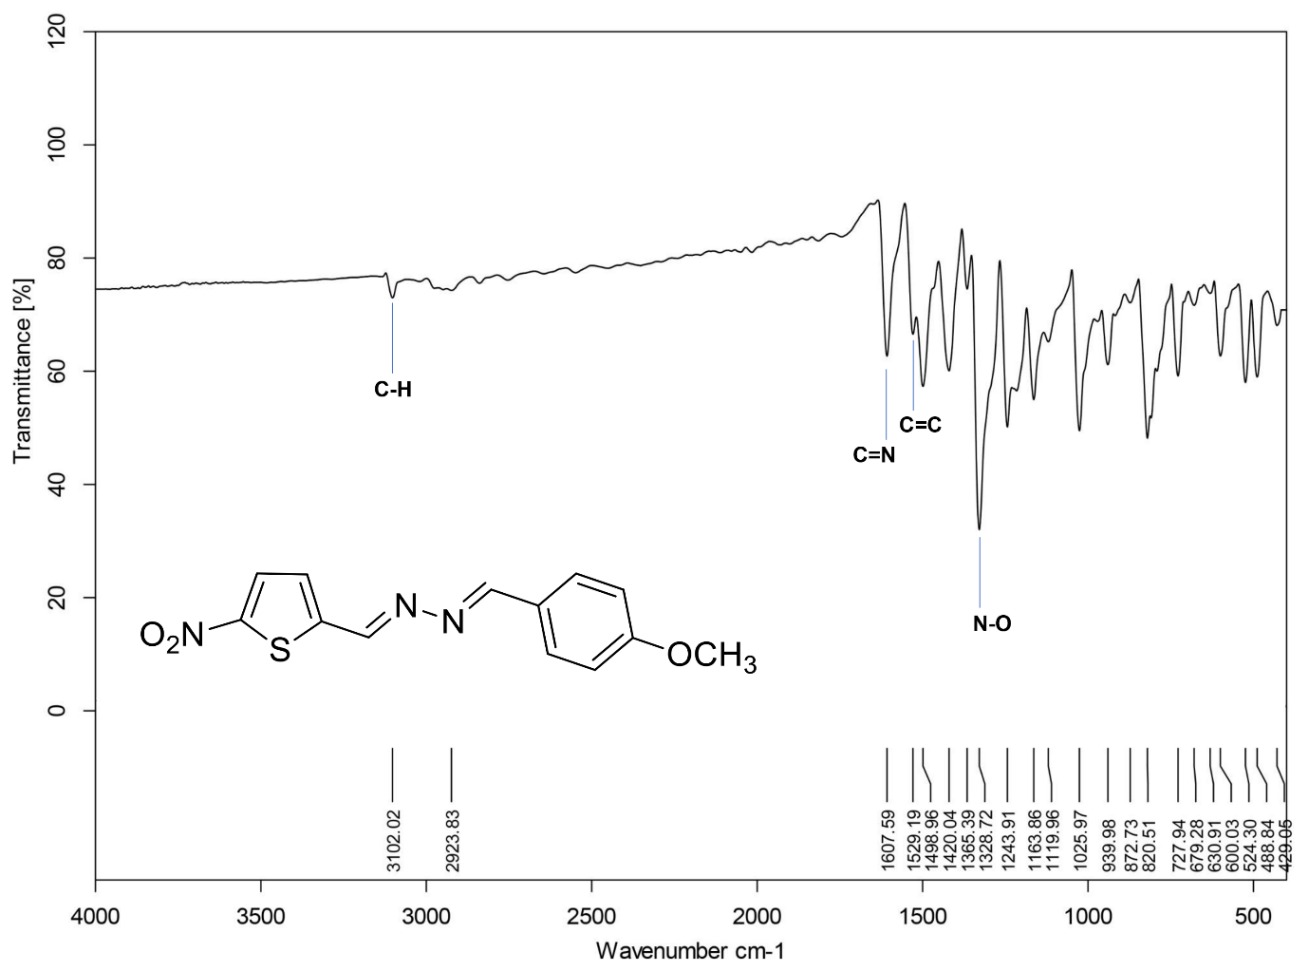

## HRMS

## Acquisition Parameter

|             |            |                       |           |                  |           |
|-------------|------------|-----------------------|-----------|------------------|-----------|
| Source Type | APCI       | Ion Polarity          | Positive  | Set Nebulizer    | 1.6 Bar   |
| Focus       | Not active | Set Capillary         | 4500 V    | Set Dry Heater   | 200 °C    |
| Scan Begin  | 50 m/z     | Set End Plate Offset  | -500 V    | Set Dry Gas      | 8.0 l/min |
| Scan End    | 1600 m/z   | Set Collision Cell RF | 100.0 Vpp | Set Divert Valve | Waste     |

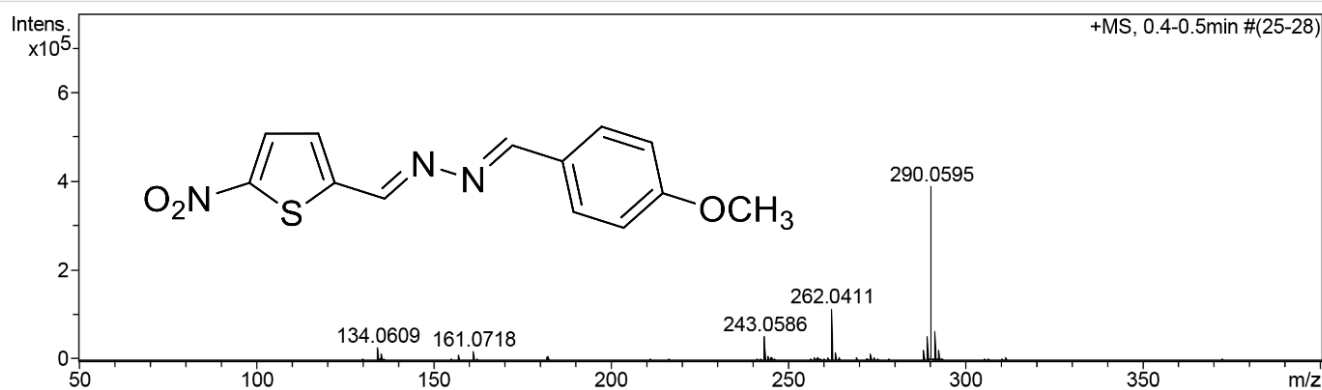

| Meas. m/z | # | Formula             | Score  | m/z      | err [mDa] | err [ppm] | mSigma | rdb | e <sup>-</sup> Conf | N-Rule |
|-----------|---|---------------------|--------|----------|-----------|-----------|--------|-----|---------------------|--------|
| 290.0595  | 1 | C 13 H 12 N 3 O 3 S | 100.00 | 290.0594 | -0.1      | -0.3      | 2.6    | 9.5 | even                | ok     |

**(1E,2E)-1-[4-(Benzyloxy)benzylidene]-2-[(5-nitrothiophen-2-yl)methylene]hydrazine (7b)****<sup>1</sup>H NMR in DMSO**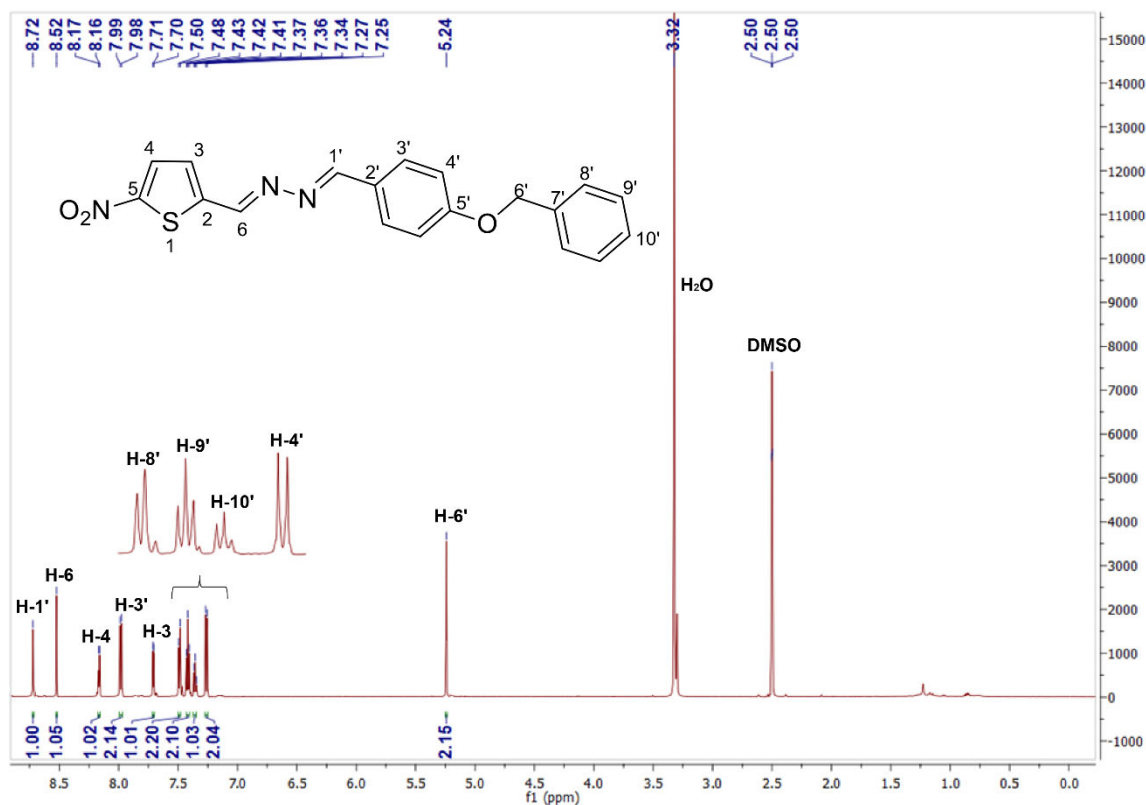**<sup>13</sup>C NMR in DMSO**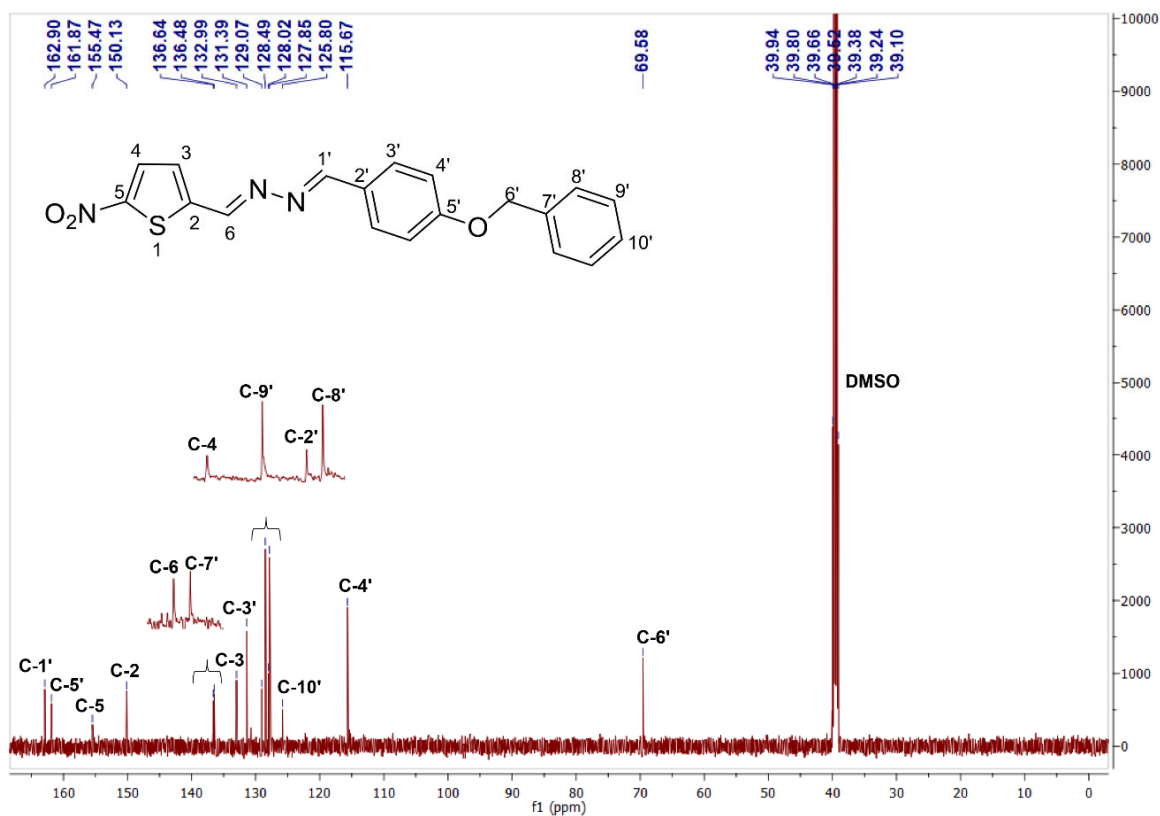

## IR Spectrum

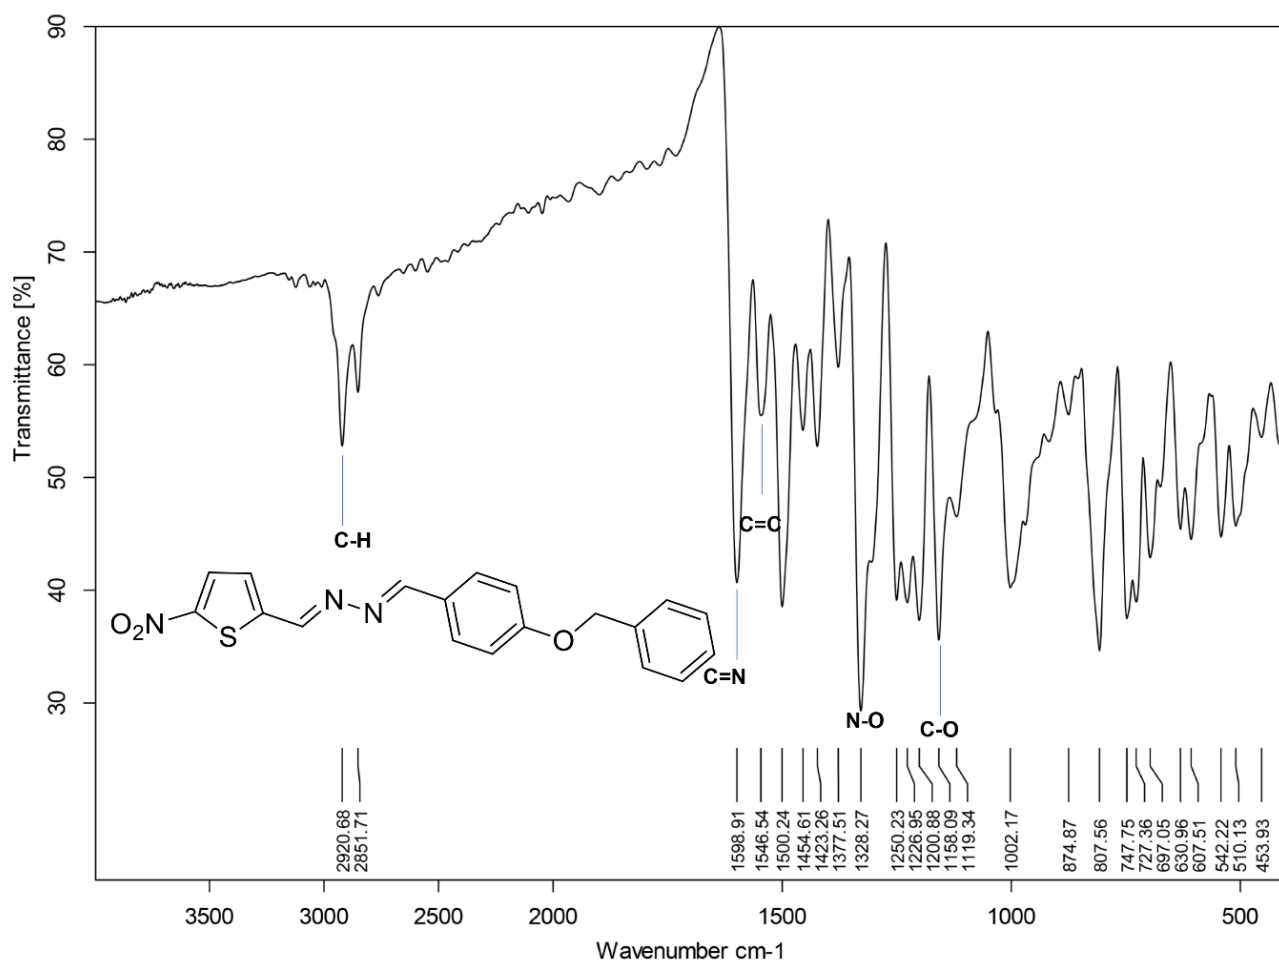

## HRMS

## Acquisition Parameter

|             |            |                       |           |                  |           |
|-------------|------------|-----------------------|-----------|------------------|-----------|
| Source Type | APCI       | Ion Polarity          | Positive  | Set Nebulizer    | 1.6 Bar   |
| Focus       | Not active | Set Capillary         | 4500 V    | Set Dry Heater   | 200 °C    |
| Scan Begin  | 50 m/z     | Set End Plate Offset  | -500 V    | Set Dry Gas      | 8.0 l/min |
| Scan End    | 1600 m/z   | Set Collision Cell RF | 100.0 Vpp | Set Divert Valve | Waste     |

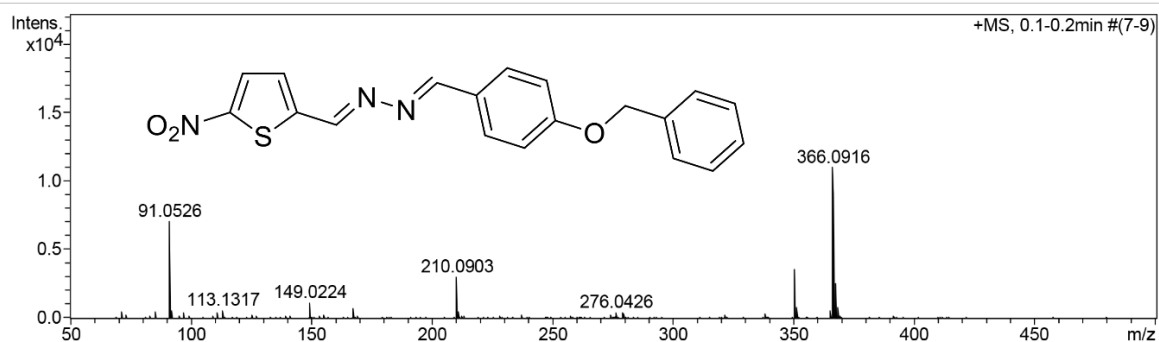

| Meas. m/z | # | Formula                                                         | Score  | m/z      | err [mDa] | err [ppm] | mSigma | rdb  | e <sup>-</sup> Conf | N-Rule |
|-----------|---|-----------------------------------------------------------------|--------|----------|-----------|-----------|--------|------|---------------------|--------|
| 91.0526   | 1 | C <sub>7</sub> H <sub>7</sub>                                   | 100.00 | 91.0542  | 1.7       | 18.2      | 5.0    | 4.5  | even                | ok     |
| 210.0903  | 1 | C <sub>14</sub> H <sub>12</sub> N <sub>2</sub> O                | 100.00 | 210.0913 | 1.0       | 4.8       | 14.1   | 9.5  | even                | ok     |
|           | 2 | C <sub>11</sub> H <sub>14</sub> O <sub>4</sub>                  | 41.62  | 210.0887 | -1.7      | -7.9      | 34.4   | 5.0  | odd                 | ok     |
| 350.1128  | 1 | C <sub>19</sub> H <sub>16</sub> N <sub>3</sub> O <sub>4</sub>   | 100.00 | 350.1135 | 0.7       | 2.1       | 17.7   | 13.5 | even                | ok     |
| 366.0916  | 1 | C <sub>19</sub> H <sub>16</sub> N <sub>3</sub> O <sub>3</sub> S | 100.00 | 366.0907 | -0.9      | -2.4      | 7.2    | 13.5 | even                | ok     |

4-(*E*)-(*E*)-[(5-Nitrothiophen-2-yl)methylene]hydrazonomethylphenol (**8b**) $^1\text{H}$  NMR in DMSO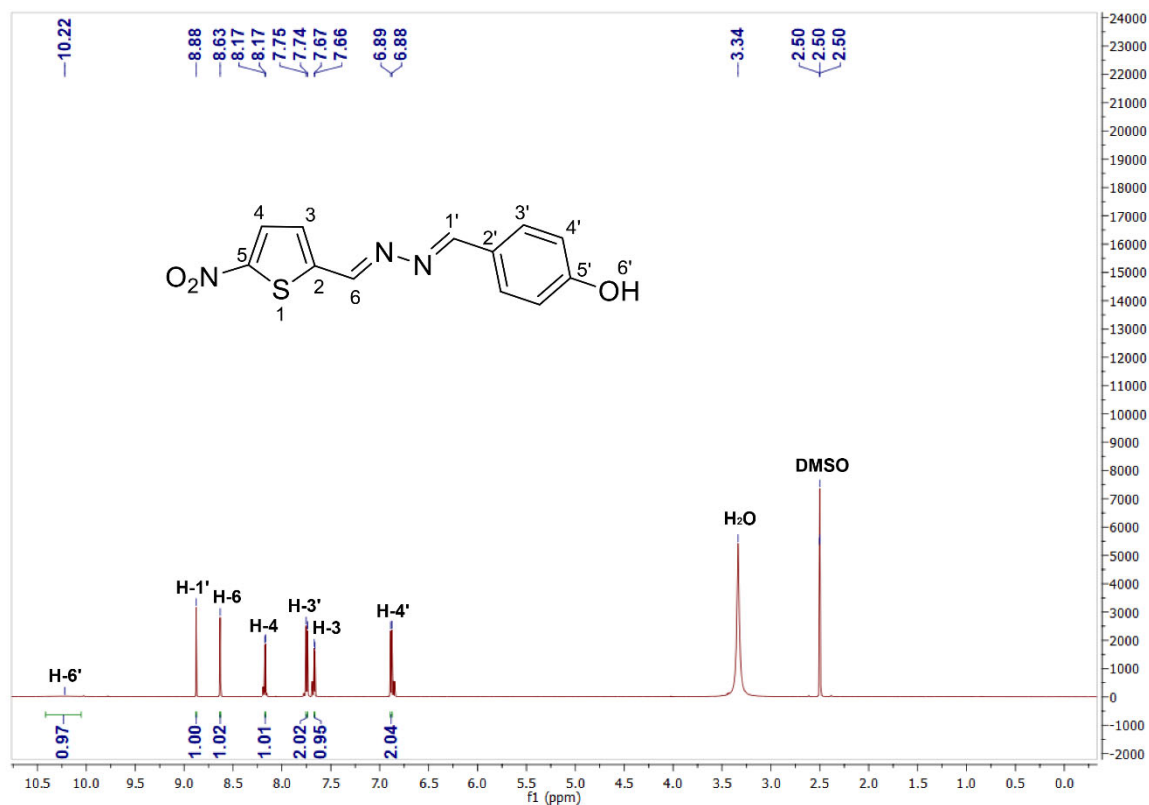 $^{13}\text{C}$  NMR in DMSO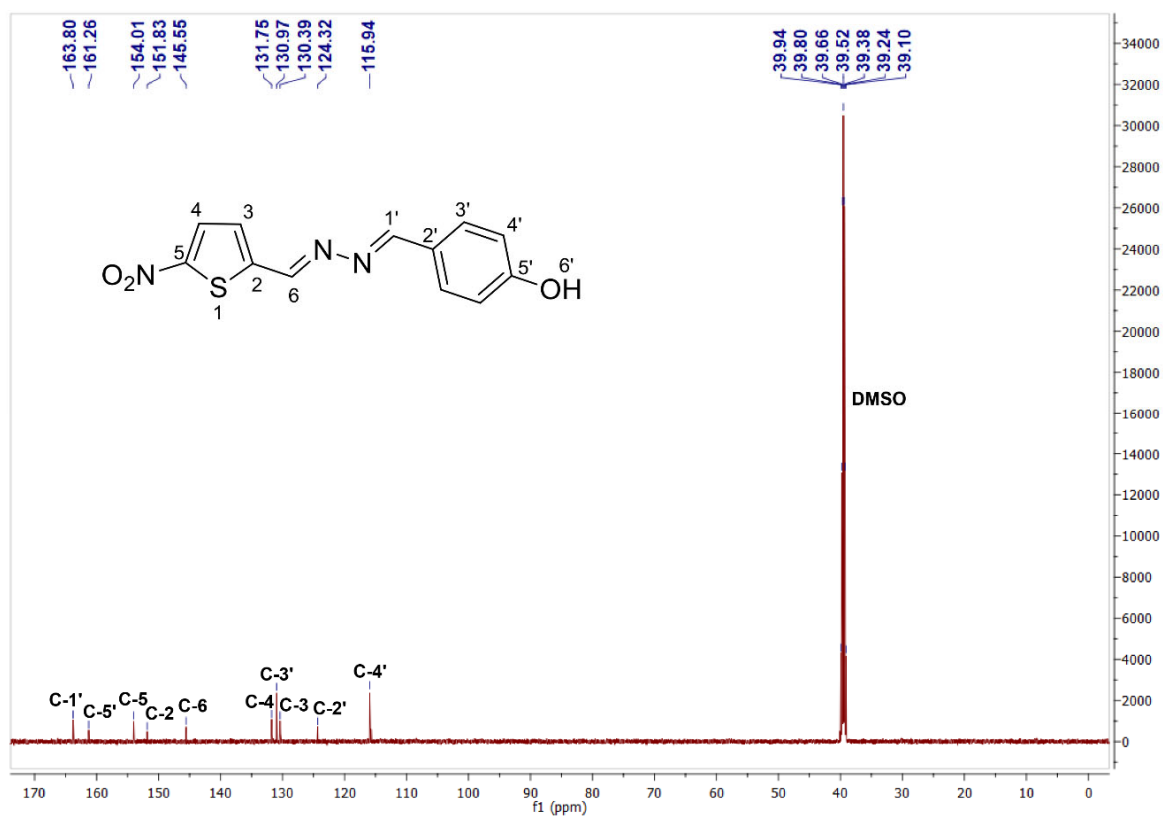

## IR Spectrum

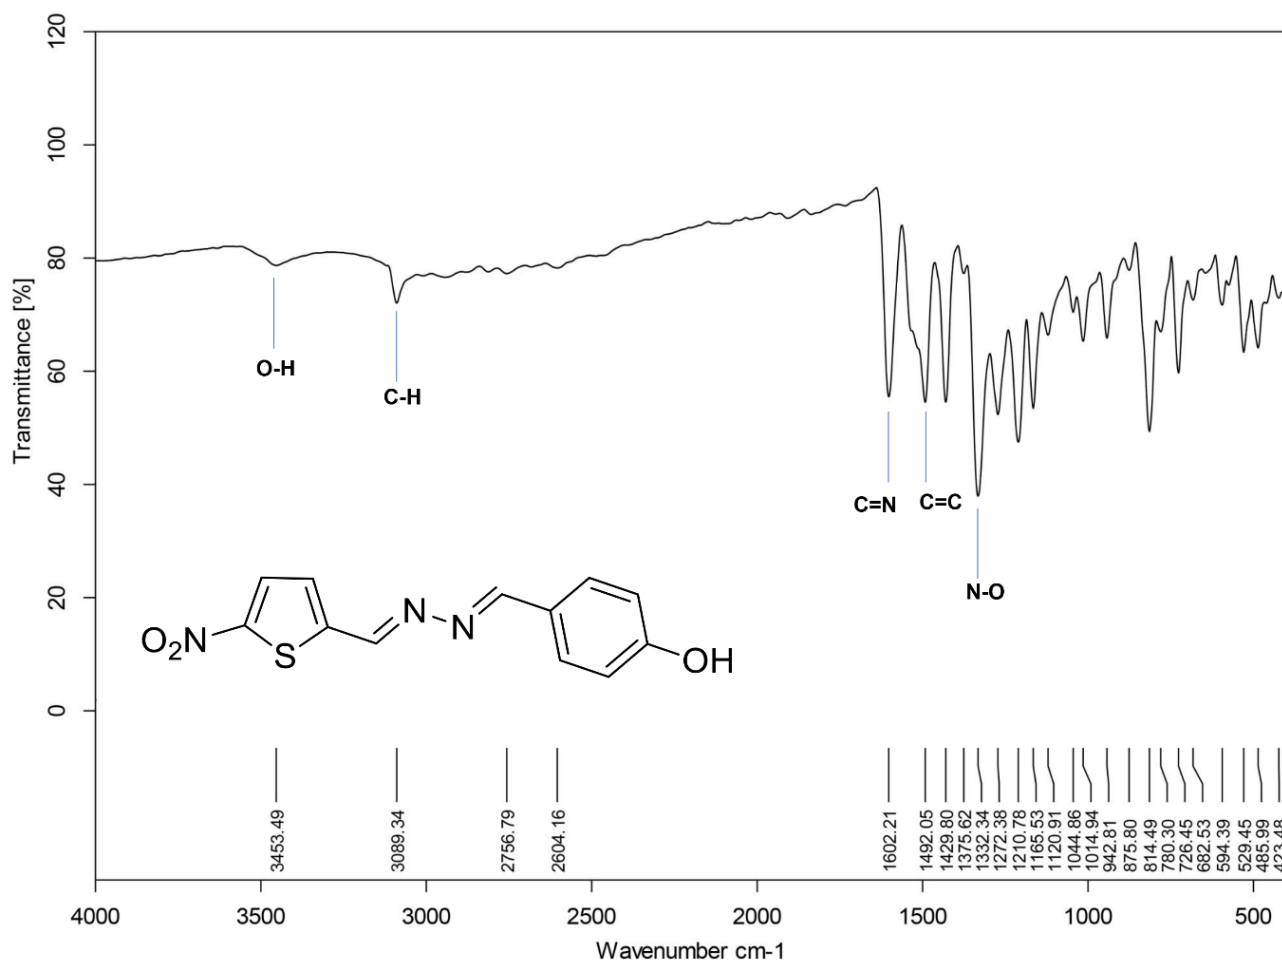

## HRMS

## Acquisition Parameter

|             |            |                       |           |                  |           |
|-------------|------------|-----------------------|-----------|------------------|-----------|
| Source Type | APCI       | Ion Polarity          | Positive  | Set Nebulizer    | 1.6 Bar   |
| Focus       | Not active | Set Capillary         | 4500 V    | Set Dry Heater   | 200 °C    |
| Scan Begin  | 50 m/z     | Set End Plate Offset  | -500 V    | Set Dry Gas      | 8.0 l/min |
| Scan End    | 1600 m/z   | Set Collision Cell RF | 100.0 Vpp | Set Divert Valve | Waste     |

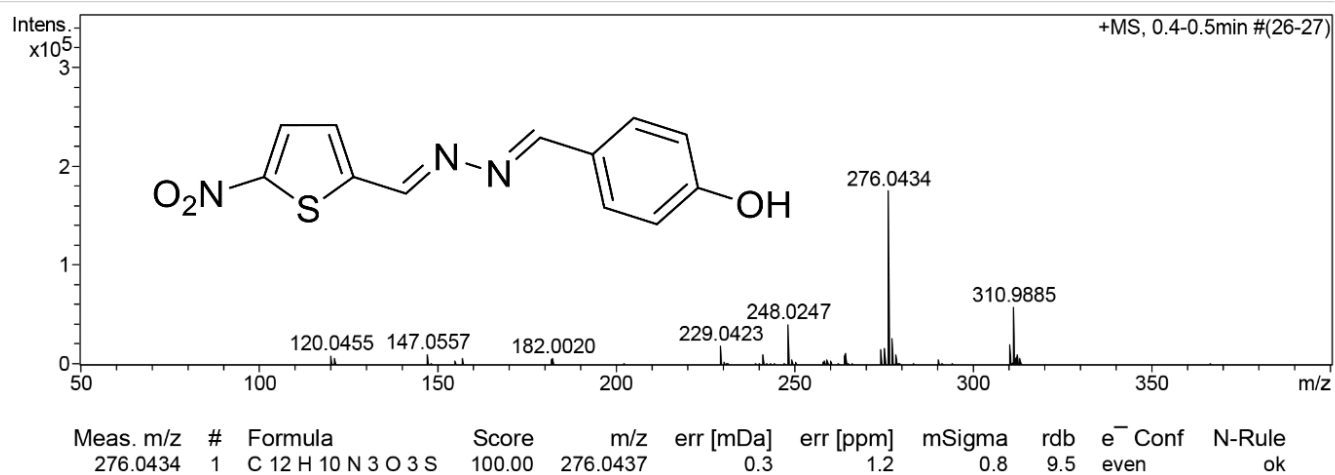

**(1E,2E)-1-(4-Nitrobenzylidene)-2-[(5-nitrothiophen-2-yl)methylene]hydrazine (9b)****<sup>1</sup>H NMR in DMSO**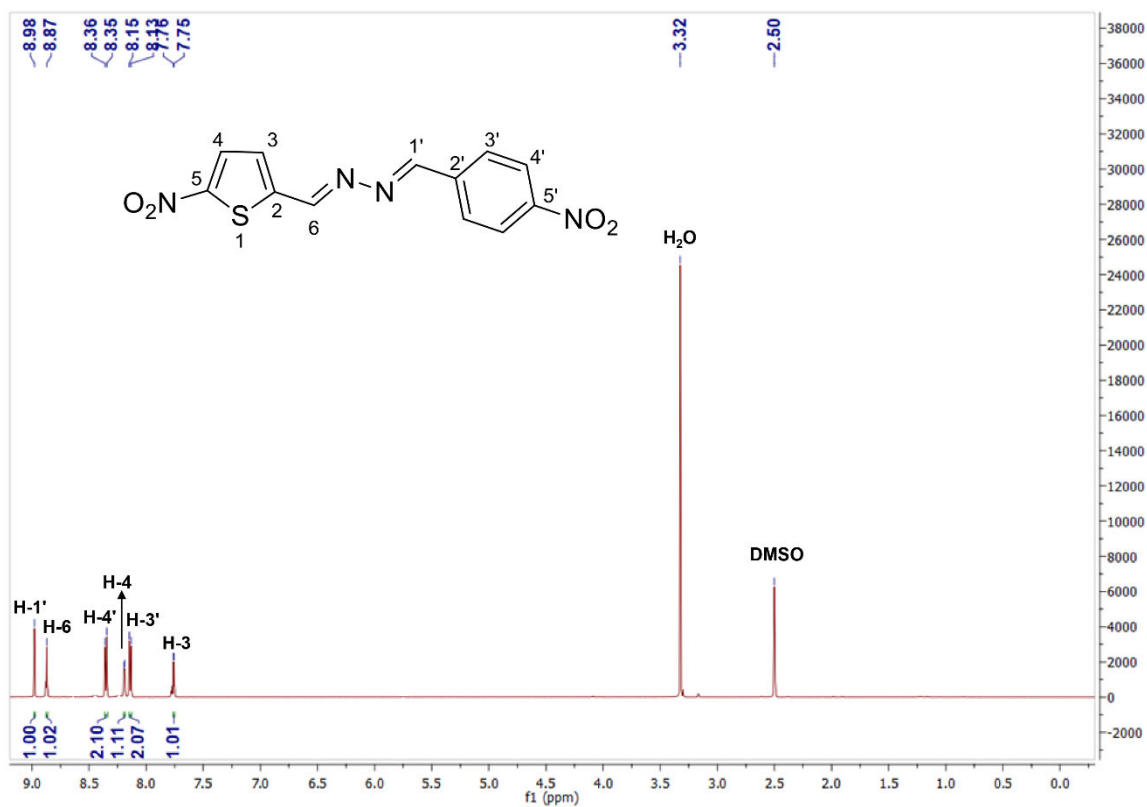**<sup>13</sup>C NMR in DMSO**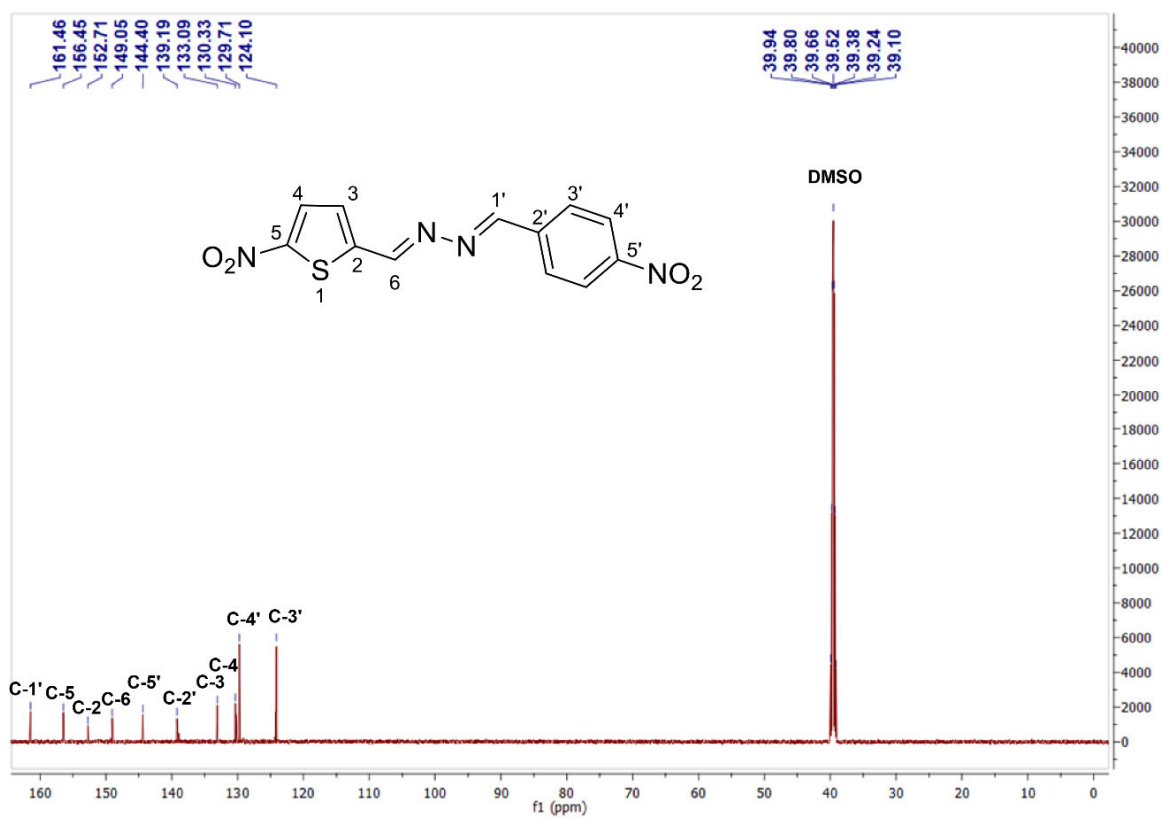

## IR Spectrum

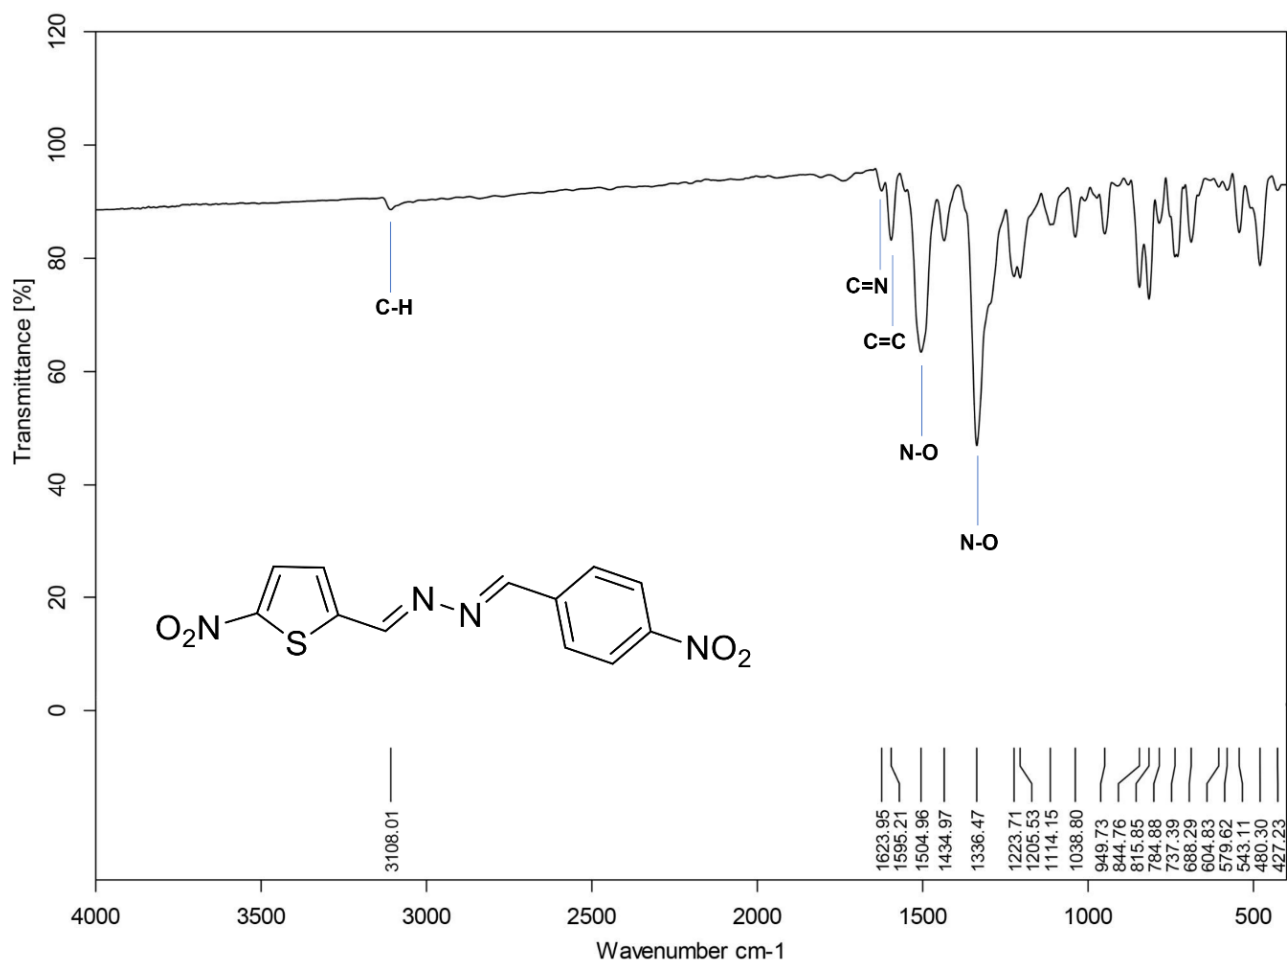

## HRMS

## Acquisition Parameter

|             |            |                       |           |                  |           |
|-------------|------------|-----------------------|-----------|------------------|-----------|
| Source Type | APCI       | Ion Polarity          | Positive  | Set Nebulizer    | 1.6 Bar   |
| Focus       | Not active | Set Capillary         | 4500 V    | Set Dry Heater   | 200 °C    |
| Scan Begin  | 50 m/z     | Set End Plate Offset  | -500 V    | Set Dry Gas      | 8.0 l/min |
| Scan End    | 1600 m/z   | Set Collision Cell RF | 100.0 Vpp | Set Divert Valve | Waste     |

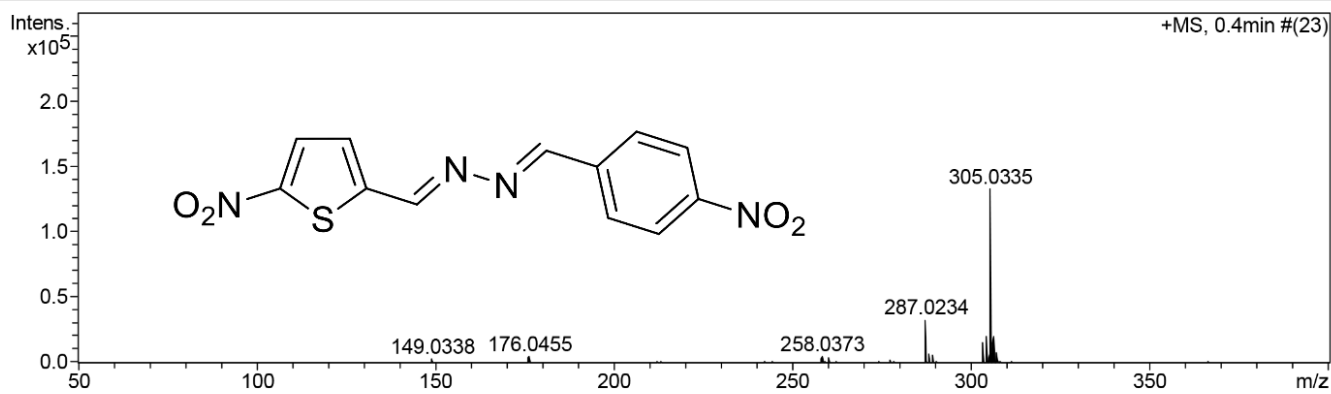

| Meas. m/z | # | Formula            | Score  | m/z      | err [mDa] | err [ppm] | mSigma | rdb  | e <sup>-</sup> Conf | N-Rule |
|-----------|---|--------------------|--------|----------|-----------|-----------|--------|------|---------------------|--------|
| 305.0335  | 1 | C 12 H 9 N 4 O 4 S | 100.00 | 305.0339 | 0.4       | 1.4       | 2.3    | 10.5 | even                | ok     |

**(E)-1-[(E)-4-(Benzyloxy)benzylidene]-2-(furan-2-ylmethylene)hydrazine (11)****<sup>1</sup>H NMR in DMSO**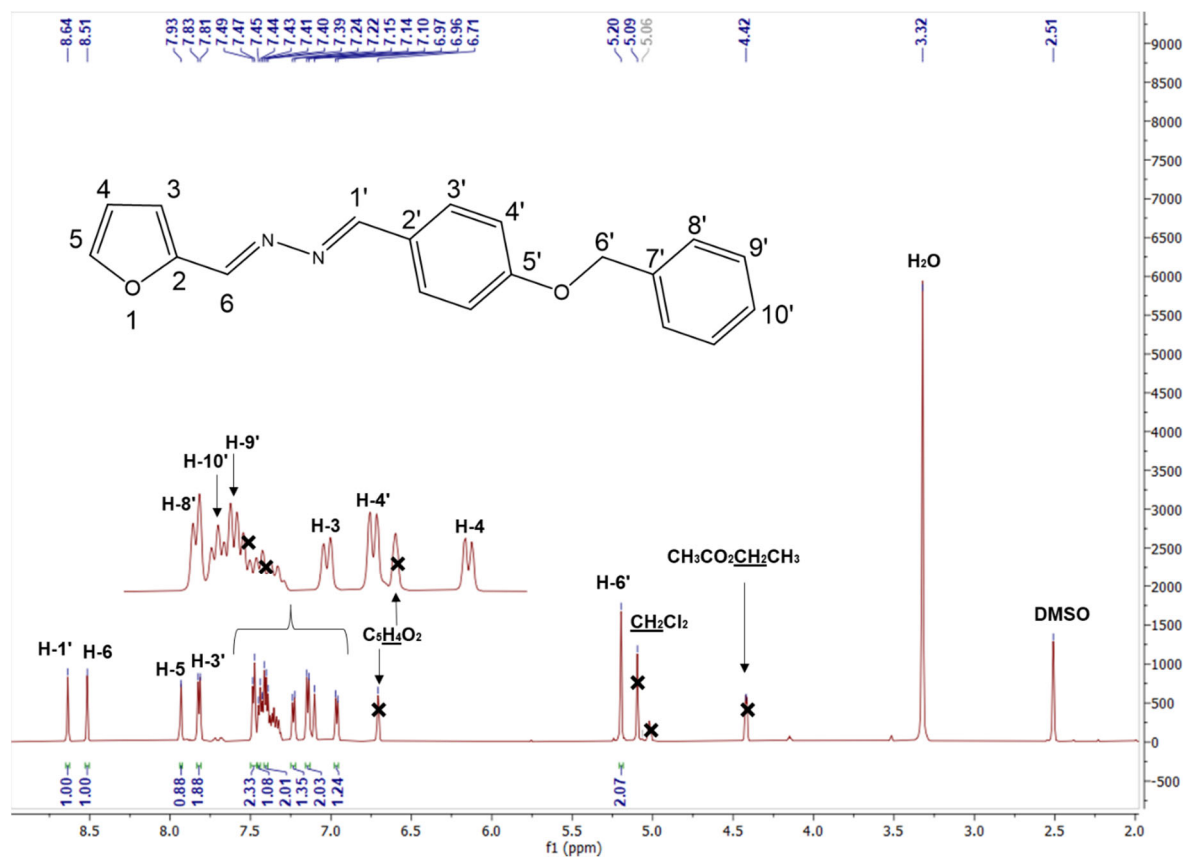**<sup>13</sup>C NMR**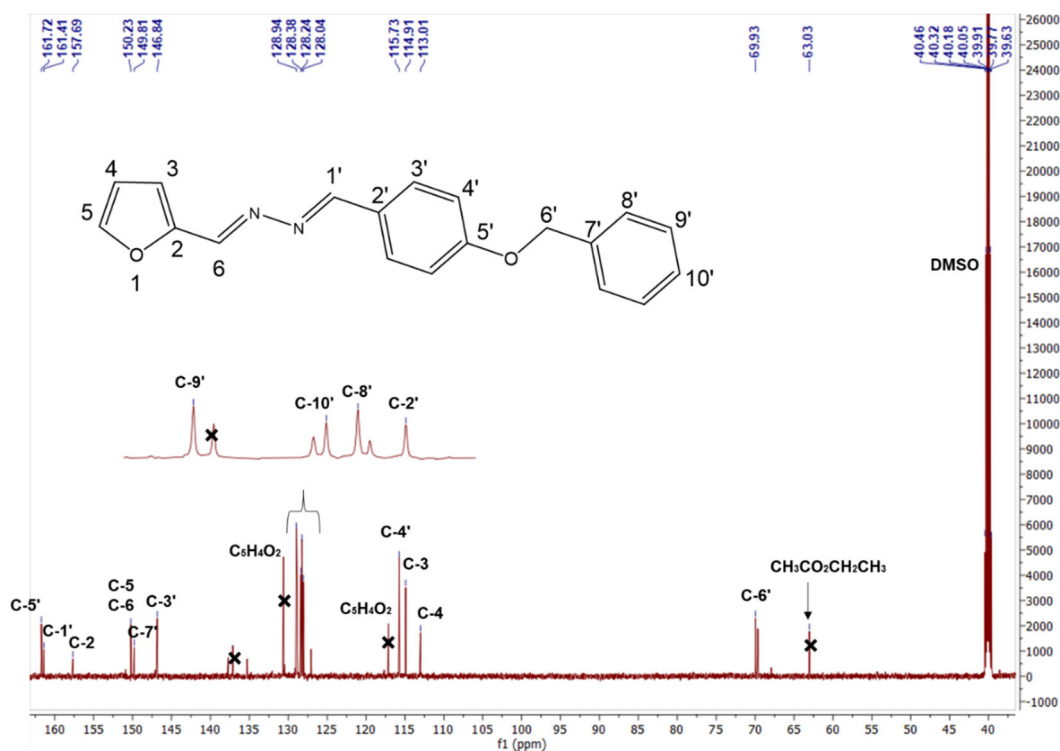



## IR

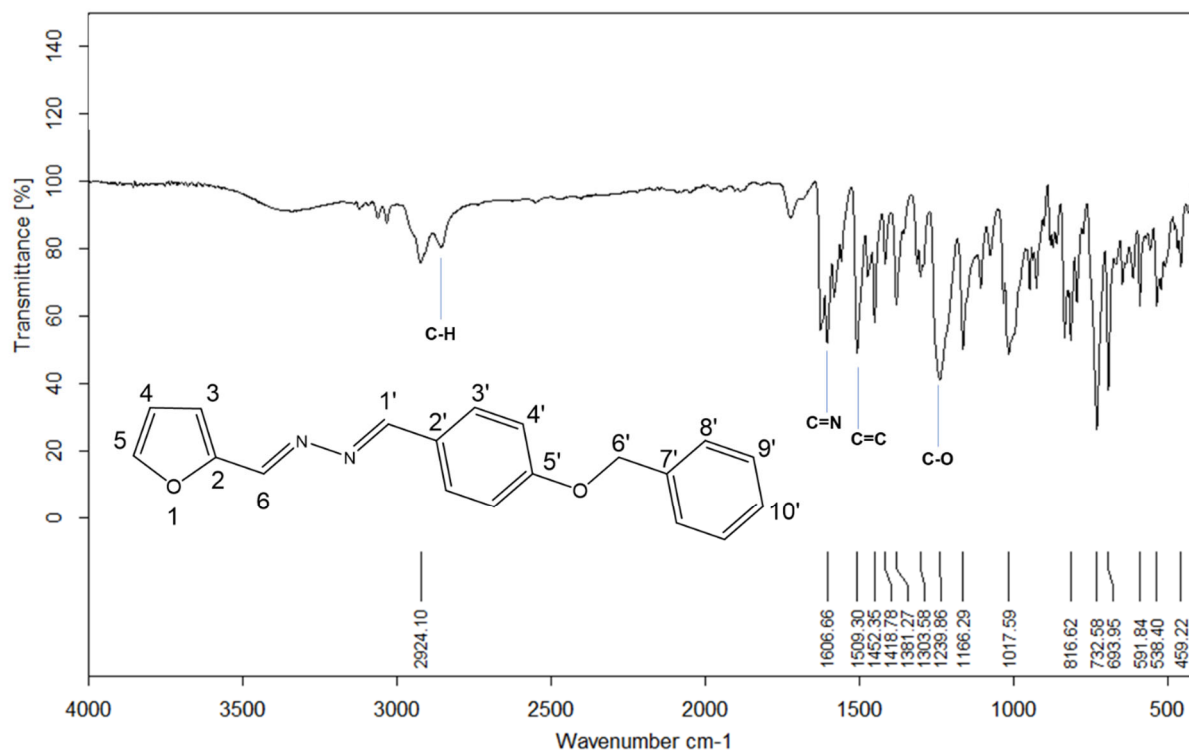

**(E)-1-(Furan-2-ylmethylene)-2-[(E)-4-nitrobenzylidene]hydrazine (12)****<sup>1</sup>H NMR in DMSO**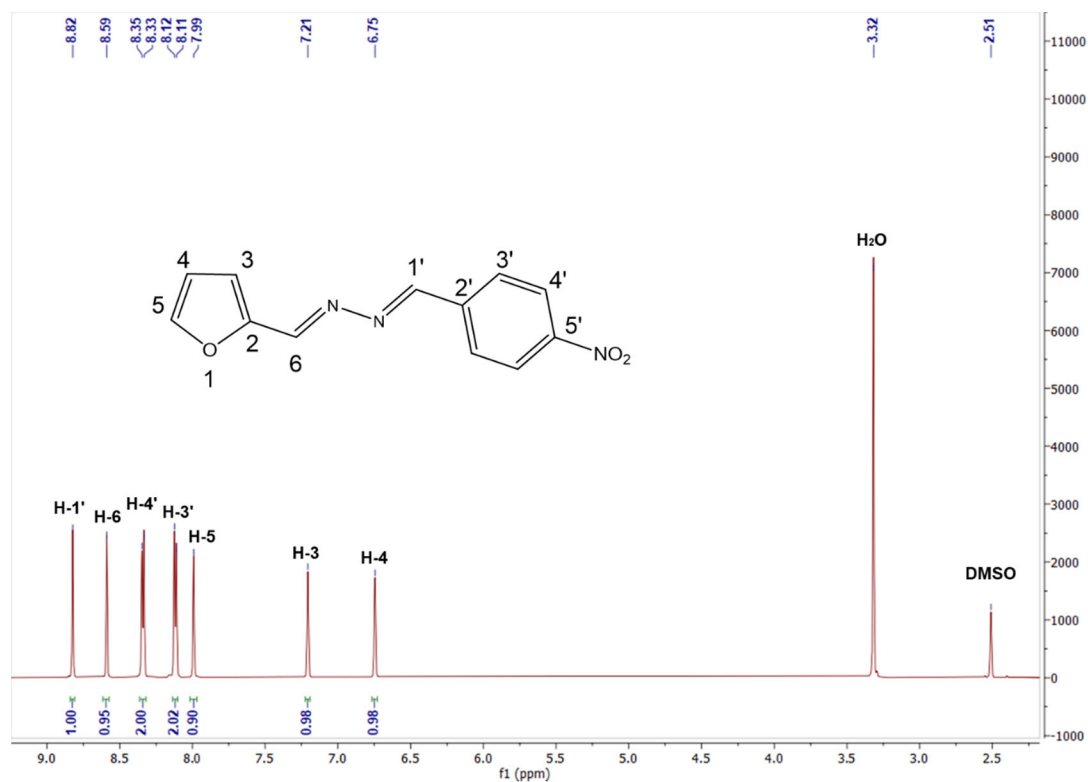**<sup>13</sup>C NMR in DMSO**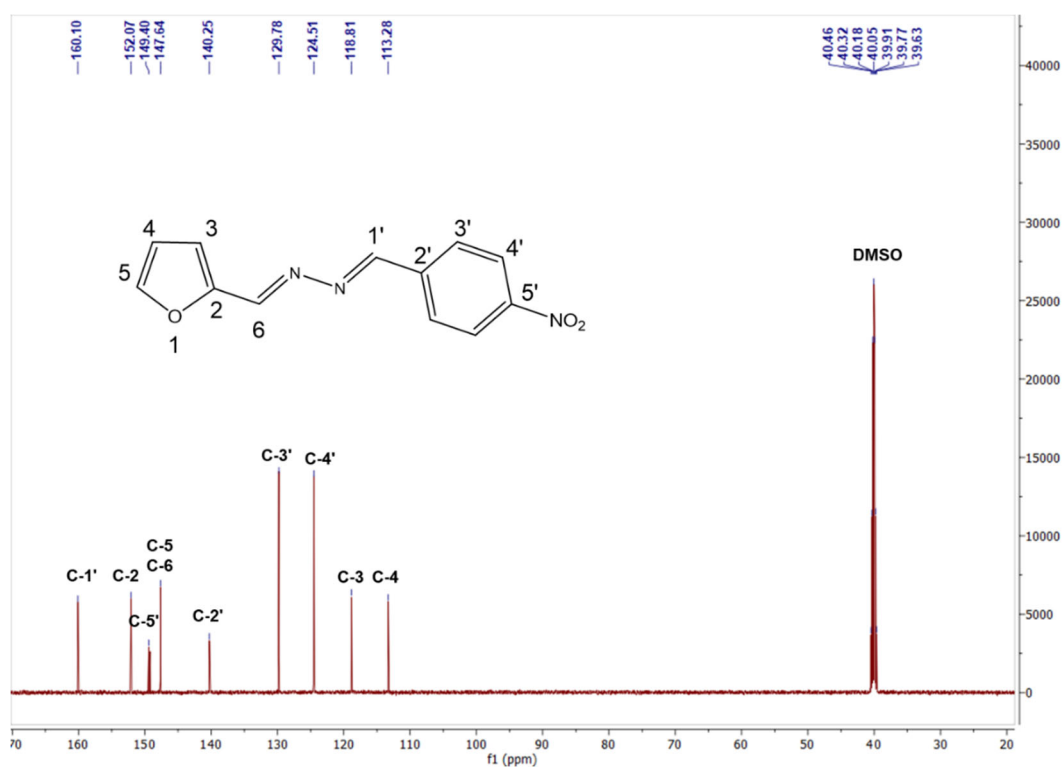

## IR Spectrum

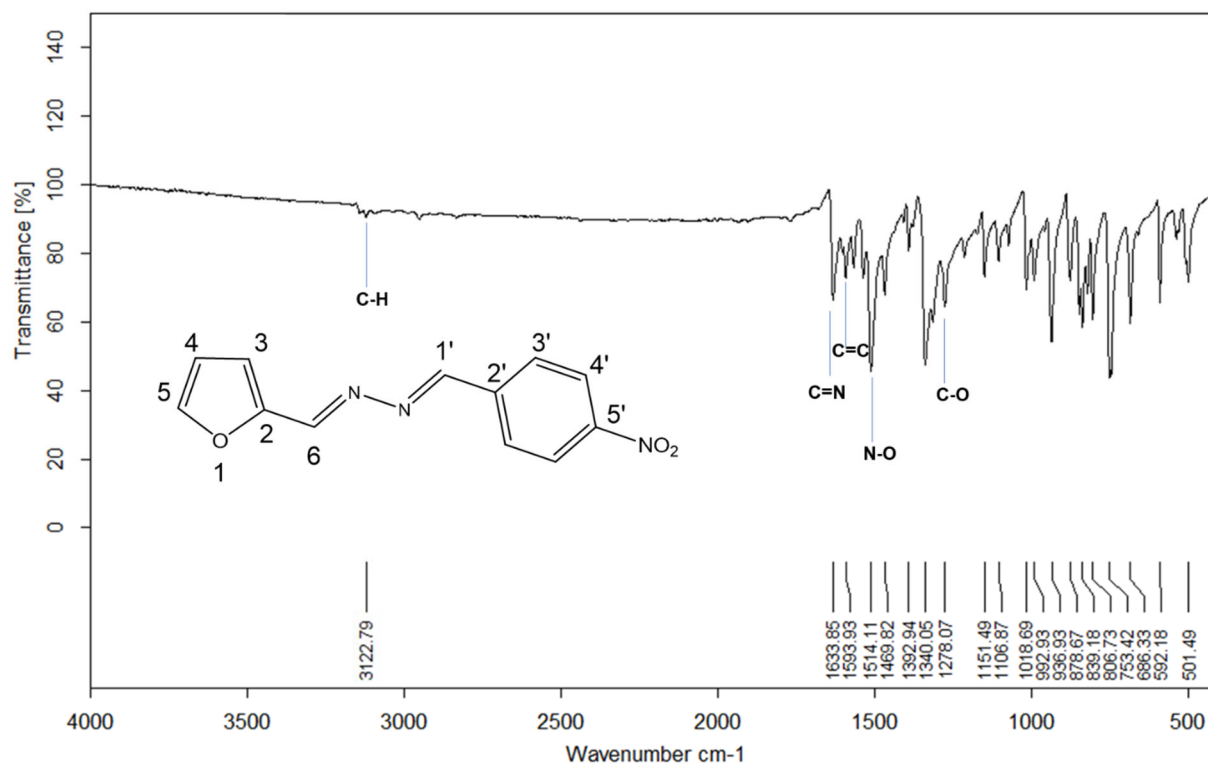

## APPENDIX B: *IN SILICO* PROPERTIES AND DATA

The physicochemical properties and subsequent absorption, distribution, metabolism, and excretion (collectively referred to as ADME) as well as drug-likeness and medicinal chemistry friendliness of test compounds were computed via the SwissADME web tool (<http://www.swissadme.ch>) [1]. The results are summarised below.

\*\*\*

**Table A1.** Physicochemical properties of nitrofuranylazines

| Compd.     | Physicochemical properties                                       |                  |               |                      |                       |                    | Lipophilicity      |                                     | Water solubility                         |                          |                         |
|------------|------------------------------------------------------------------|------------------|---------------|----------------------|-----------------------|--------------------|--------------------|-------------------------------------|------------------------------------------|--------------------------|-------------------------|
|            | Chemical formula                                                 | Molecular weight | Fraction Csp3 | Num. rotatable bonds | Num. H-bond acceptors | Num. H-bond donors | Molar refractivity | TPSA (Å <sup>2</sup> ) <sup>a</sup> | LogP <sub>o/w</sub> (MLogP) <sup>b</sup> | LogS (ESOL) <sup>d</sup> | LogS (Ali) <sup>e</sup> |
| <b>NFA</b> | C <sub>5</sub> H <sub>3</sub> NO <sub>4</sub>                    | 141.08           | 0             | 2                    | 4                     | 0                  | 32.92              | 76.03                               | -0.93                                    | -1.59                    | -2.2                    |
| <b>1a</b>  | C <sub>12</sub> H <sub>9</sub> N <sub>3</sub> O <sub>3</sub>     | 243.22           | 0             | 4                    | 5                     | 0                  | 69.16              | 83.68                               | 1.83                                     | -2.77                    | 3.34                    |
| <b>2a</b>  | C <sub>12</sub> H <sub>8</sub> FN <sub>3</sub> O <sub>3</sub>    | 261.21           | 0             | 4                    | 6                     | 0                  | 69.12              | 83.68                               | 1.42                                     | -2.92                    | 3.45                    |
| <b>3a</b>  | C <sub>12</sub> H <sub>8</sub> ClN <sub>3</sub> O <sub>3</sub>   | 277.66           | 0             | 4                    | 5                     | 0                  | 74.17              | 83.68                               | 1.56                                     | -3.35                    | 3.99                    |
| <b>4a</b>  | C <sub>12</sub> H <sub>8</sub> BrN <sub>3</sub> O <sub>3</sub>   | 322.11           | 0             | 4                    | 5                     | 0                  | 76.86              | 83.68                               | 1.69                                     | -3.67                    | 4.06                    |
| <b>5a</b>  | C <sub>13</sub> H <sub>11</sub> N <sub>3</sub> O <sub>3</sub>    | 257.24           | 0.08          | 4                    | 5                     | 0                  | 74.13              | 83.68                               | 1.29                                     | -3.06                    | 3.72                    |
| <b>6a</b>  | C <sub>13</sub> H <sub>11</sub> N <sub>3</sub> O <sub>4</sub>    | 273.24           | 0.08          | 5                    | 6                     | 0                  | 75.65              | 92.91                               | 0.76                                     | -2.83                    | 3.51                    |
| <b>7a</b>  | C <sub>19</sub> H <sub>15</sub> N <sub>3</sub> O <sub>4</sub>    | 349.34           | 0.05          | 7                    | 6                     | 0                  | 100.14             | 92.91                               | 2.84                                     | -4.75                    | 5.99                    |
| <b>8a</b>  | C <sub>12</sub> H <sub>9</sub> N <sub>3</sub> O <sub>4</sub>     | 259.22           | 0             | 4                    | 6                     | 1                  | 71.18              | 103.91                              | 0.49                                     | -2.62                    | 3.39                    |
| <b>9a</b>  | C <sub>12</sub> H <sub>8</sub> N <sub>4</sub> O <sub>5</sub>     | 288.22           | 0             | 5                    | 7                     | 0                  | 77.98              | 129.5                               | 0.88                                     | -2.81                    | 4.12                    |
| <b>NTA</b> | C <sub>5</sub> H <sub>3</sub> NO <sub>3</sub> S                  | 157.15           | 0             | 2                    | 3                     | 0                  | 38.53              | 91.13                               | -0.91                                    | -2.04                    | 3.08                    |
| <b>1b</b>  | C <sub>12</sub> H <sub>9</sub> N <sub>3</sub> O <sub>2</sub> S   | 259.28           | 0             | 4                    | 4                     | 0                  | 74.77              | 98.78                               | 1.83                                     | -3.82                    | 5.23                    |
| <b>2b</b>  | C <sub>12</sub> H <sub>8</sub> FN <sub>3</sub> O <sub>2</sub> S  | 277.27           | 0             | 4                    | 5                     | 0                  | 74.73              | 98.78                               | 1.43                                     | -3.97                    | 5.33                    |
| <b>3b</b>  | C <sub>12</sub> H <sub>8</sub> ClN <sub>3</sub> O <sub>2</sub> S | 293.73           | 0             | 4                    | 4                     | 0                  | 79.78              | 98.78                               | 1.56                                     | -4.41                    | 5.88                    |
| <b>4b</b>  | C <sub>12</sub> H <sub>8</sub> BrN <sub>3</sub> O <sub>2</sub> S | 338.18           | 0             | 4                    | 4                     | 0                  | 82.47              | 98.78                               | 1.69                                     | -4.72                    | 5.94                    |
| <b>5b</b>  | C <sub>13</sub> H <sub>11</sub> N <sub>3</sub> O <sub>2</sub> S  | 273.31           | 0.08          | 4                    | 4                     | 0                  | 79.74              | 98.78                               | 1.29                                     | -4.12                    | 5.61                    |
| <b>6b</b>  | C <sub>13</sub> H <sub>11</sub> N <sub>3</sub> O <sub>3</sub> S  | 289.31           | 0.08          | 5                    | 5                     | 0                  | 81.26              | 108.01                              | 0.75                                     | -3.88                    | 5.39                    |
| <b>7b</b>  | C <sub>19</sub> H <sub>15</sub> N <sub>3</sub> O <sub>3</sub> S  | 365.41           | 0.05          | 7                    | 5                     | 0                  | 105.75             | 108.01                              | 2.83                                     | -5.24                    | 6.95                    |
| <b>8b</b>  | C <sub>12</sub> H <sub>9</sub> N <sub>3</sub> O <sub>3</sub> S   | 275.28           | 0             | 4                    | 5                     | 1                  | 76.79              | 119.01                              | 0.48                                     | -3.68                    | 5.29                    |
| <b>9b</b>  | C <sub>12</sub> H <sub>8</sub> N <sub>4</sub> O <sub>4</sub> S   | 304.28           | 0             | 5                    | 6                     | 0                  | 83.59              | 144.6                               | 0.84                                     | -3.86                    | 6.01                    |
| <b>NFX</b> | C <sub>12</sub> H <sub>9</sub> N <sub>3</sub> O <sub>5</sub>     | 275.22           | 0             | 5                    | 6                     | 2                  | 70.72              | 120.65                              | 0.37                                     | -2.95                    | 4.27                    |
| <b>FZD</b> | C <sub>8</sub> H <sub>7</sub> N <sub>3</sub> O <sub>5</sub>      | 225.16           | 0.25          | 3                    | 6                     | 0                  | 56.97              | 100.86                              | -0.31                                    | -1.24                    | 1.62                    |
| <b>NFZ</b> | C <sub>6</sub> H <sub>6</sub> N <sub>4</sub> O <sub>4</sub>      | 198.14           | 0             | 4                    | 5                     | 2                  | 47.09              | 126.44                              | -1                                       | -1.21                    | 2.45                    |
| <b>NFT</b> | C <sub>8</sub> H <sub>6</sub> N <sub>4</sub> O <sub>5</sub>      | 238.16           | 0.12          | 3                    | 6                     | 1                  | 62.8               | 120.73                              | -0.76                                    | -1.04                    | -1.6                    |

<sup>a</sup>Topological Polar Surface Area (TPSA, Å<sup>2</sup>): Calculated from [2]; <sup>b</sup>MLogP<sub>o/w</sub>: Topological method implemented from [3-5]; <sup>c</sup>LogS scale: insoluble < -10 < poorly < -6 < moderately < -4 < soluble < -2 < very < 0 < highly; <sup>d</sup>LogS (ESOL): Topological method implemented from [6]; <sup>e</sup>LogS (Ali): Topological method implemented from [7]

**Table A2.** Pharmacokinetic properties of nitrofuranylazines

| Compd.     | Pharmacokinetic properties |                |               |                  |                   |                  |                  |                  |
|------------|----------------------------|----------------|---------------|------------------|-------------------|------------------|------------------|------------------|
|            | GI absorption              | BBB permeation | Pgp substrate | CYP1A2 inhibitor | CYP2C19 inhibitor | CYP2C9 inhibitor | CYP2D6 inhibitor | CYP3A4 inhibitor |
| <b>NFA</b> | High                       | No             | No            | Yes              | Yes               | No               | No               | No               |
| <b>1a</b>  | High                       | No             | No            | Yes              | Yes               | Yes              | No               | No               |
| <b>2a</b>  | High                       | No             | No            | No               | No                | No               | No               | No               |
| <b>3a</b>  | High                       | No             | No            | No               | No                | No               | No               | No               |
| <b>4a</b>  | High                       | No             | No            | No               | No                | No               | No               | No               |
| <b>5a</b>  | High                       | No             | No            | Yes              | Yes               | Yes              | No               | No               |
| <b>6a</b>  | High                       | No             | No            | Yes              | Yes               | No               | No               | No               |
| <b>7a</b>  | High                       | No             | No            | Yes              | Yes               | Yes              | No               | No               |
| <b>8a</b>  | High                       | No             | No            | Yes              | Yes               | Yes              | No               | No               |
| <b>9a</b>  | High                       | No             | No            | Yes              | Yes               | Yes              | No               | No               |
| <b>NTA</b> | High                       | No             | No            | Yes              | Yes               | Yes              | No               | No               |
| <b>1b</b>  | High                       | No             | No            | No               | Yes               | Yes              | No               | No               |
| <b>2b</b>  | High                       | No             | No            | Yes              | Yes               | Yes              | No               | No               |
| <b>3b</b>  | Low                        | No             | No            | Yes              | Yes               | Yes              | No               | No               |
| <b>4b</b>  | High                       | No             | No            | No               | No                | No               | No               | No               |
| <b>5b</b>  | High                       | No             | No            | No               | No                | No               | No               | No               |
| <b>6b</b>  | High                       | No             | No            | No               | No                | No               | No               | No               |
| <b>7b</b>  | High                       | No             | No            | Yes              | Yes               | No               | No               | No               |
| <b>8b</b>  | High                       | No             | No            | No               | No                | No               | No               | No               |
| <b>9b</b>  | High                       | No             | No            | Yes              | Yes               | Yes              | No               | No               |
| <b>NFX</b> | High                       | No             | No            | No               | No                | No               | No               | No               |
| <b>FZD</b> | High                       | No             | No            | No               | No                | No               | No               | No               |
| <b>NFZ</b> | High                       | No             | No            | No               | No                | No               | No               | No               |
| <b>NFT</b> | High                       | No             | No            | Yes              | Yes               | Yes              | No               | No               |

**Table A3.** Drug-likeness and medicinal chemistry friendliness of nitrofuranylazines

| Compd.     | Drug-likeness         |                                       |                    |                   |                     | Medicinal chemistry friendliness   |                            |                                 |                              |
|------------|-----------------------|---------------------------------------|--------------------|-------------------|---------------------|------------------------------------|----------------------------|---------------------------------|------------------------------|
|            | Num. violations       |                                       |                    |                   |                     | Bioavailability score <sup>f</sup> | Num. violations            |                                 |                              |
|            | Lipinski <sup>a</sup> | Ghose <sup>b</sup>                    | Veber <sup>c</sup> | Egan <sup>d</sup> | Muegge <sup>e</sup> |                                    | PAINS <sup>g</sup>         | Brenk <sup>h</sup>              | Lead-likeness <sup>i</sup>   |
| <b>NFA</b> | 0                     | 3<br>(MW<160,<br>MR<40,<br>#atoms<20) | 0                  | 0                 | 1<br>(MW<200)       | 0.55                               | 0                          | 2<br>(aldehyde,<br>nitro group) | 1<br>(MW<250)                |
| <b>1a</b>  | 0                     | 0                                     | 0                  | 0                 | 0                   | 0.55                               | 0                          | 2<br>(azine, nitro<br>group)    | 1<br>(MW<250)                |
| <b>2a</b>  | 0                     | 0                                     | 0                  | 0                 | 0                   | 0.55                               | 0                          | 2<br>(azine, nitro<br>group)    | 0                            |
| <b>3a</b>  | 0                     | 0                                     | 0                  | 0                 | 0                   | 0.55                               | 0                          | 2<br>(azine, nitro<br>group)    | 0                            |
| <b>4a</b>  | 0                     | 0                                     | 0                  | 0                 | 0                   | 0.55                               | 0                          | 2<br>(azine, nitro<br>group)    | 0                            |
| <b>5a</b>  | 0                     | 0                                     | 0                  | 0                 | 0                   | 0.55                               | 0                          | 2<br>(azine, nitro<br>group)    | 0                            |
| <b>6a</b>  | 0                     | 0                                     | 0                  | 0                 | 0                   | 0.55                               | 0                          | 2<br>(azine, nitro<br>group)    | 0                            |
| <b>7a</b>  | 0                     | 0                                     | 0                  | 0                 | 0                   | 0.55                               | 0                          | 2<br>(azine, nitro<br>group)    | 1<br>(XLOGP3>3.5)            |
| <b>8a</b>  | 0                     | 0                                     | 0                  | 0                 | 0                   | 0.55                               | 1<br>(azine<br>phenol)     | 2<br>azine, nitro<br>group)     | 0                            |
| <b>9a</b>  | 0                     | 0                                     | 0                  | 0                 | 0                   | 0.55                               | 0                          | 2<br>(azine, nitro<br>group)    | 0                            |
| <b>NTA</b> | 0                     | 3<br>(MW<160,<br>MR<40,<br>#atoms<20) | 0                  | 0                 | 1<br>(MW<200)       | 0.55                               | 0                          | 2<br>(aldehyde,<br>nitro group) | 1<br>(MW<250)                |
| <b>1b</b>  | 0                     | 0                                     | 0                  | 0                 | 0                   | 0.55                               | 0                          | 2<br>(azine, nitro<br>group)    | 0                            |
| <b>2b</b>  | 0                     | 0                                     | 0                  | 0                 | 0                   | 0.55                               | 0                          | 2<br>(azine, nitro<br>group)    | 1<br>(XLOGP3>3.5)            |
| <b>3b</b>  | 0                     | 0                                     | 0                  | 0                 | 0                   | 0.55                               | 0                          | 2<br>(azine, nitro<br>group)    | 1<br>(XLOGP3>3.5)            |
| <b>4b</b>  | 0                     | 0                                     | 0                  | 0                 | 0                   | 0.55                               | 0                          | 2<br>azine, nitro<br>group)     | 1<br>(XLOGP3>3.5)            |
| <b>5b</b>  | 0                     | 0                                     | 0                  | 0                 | 0                   | 0.55                               | 0                          | 2<br>(azine, nitro<br>group)    | 1<br>(XLOGP3>3.5)            |
| <b>6b</b>  | 0                     | 0                                     | 0                  | 0                 | 0                   | 0.55                               | 0                          | 2<br>azine, nitro<br>group)     | 0                            |
| <b>7b</b>  | 0                     | 0                                     | 0                  | 0                 | 0                   | 0.55                               | 0                          | 2<br>(azine, nitro<br>group)    | 2<br>(MW>350,<br>XLOGP3>3.5) |
| <b>8b</b>  | 0                     | 0                                     | 0                  | 0                 | 0                   | 0.55                               | 1<br>(hydrazone<br>phenol) | 2<br>(azine, nitro<br>group)    | 0                            |
| <b>9b</b>  | 0                     | 0                                     | 1<br>(TPSA>140)    | 1<br>(TPSA>131.6) | 0                   | 0.55                               | 0                          | 2<br>(azine, nitro<br>group)    | 0                            |
| <b>NFX</b> | 0                     | 0                                     | 0                  | 0                 | 0                   | 0.55                               | 0                          | 2                               | 0                            |

| Journal Name |   |   |   |   |   |      |   | ARTICLE                         |          |
|--------------|---|---|---|---|---|------|---|---------------------------------|----------|
|              |   |   |   |   |   |      |   | (imine, nitro group)<br>2       | 1        |
| <b>FZD</b>   | 0 | 0 | 0 | 0 | 0 | 0.55 | 0 | (imine, nitro group)<br>2       | (MW<250) |
| <b>NFZ</b>   | 0 | 0 | 0 | 0 | 1 | 0.55 | 0 | (imine, nitro group)<br>3       | (MW<250) |
| <b>NFT</b>   | 0 | 0 | 0 | 0 | 0 | 0.55 | 0 | (hydantoin, imine, nitro group) | (MW<250) |

<sup>a</sup>Lipinski: MW < 500, MLOGP < 4.15, N or O < 10, NH or OH < 5 [8]; <sup>b</sup>Ghose: 160 < MW < 480, -04 < WLOGP < 5.6, 40 < MR < 130, 20 < atoms < 70 [9]; <sup>c</sup>Veber: Num. rotatable bonds < 10, TPSA < 140 [10]; <sup>d</sup>Egan: WLOGP < 5.88, TPSA < 131.6 [11]; <sup>e</sup>Muegge: 200 < MW < 600, -2 < XLOGP < 5, TPSA < 150, num. rings < 7, num. carbon > 4, num. heteroatoms > 1, num. rotatable bonds < 15, num. H-bond acceptors < 10, num. H-bond donors < 5 [12]; <sup>f</sup>The probability that a compound will have > 10% bioavailability in rat or measurable Caco-2 permeability [13]; <sup>g</sup>Pan ssay interference structures (PAINS) [14]; <sup>h</sup>Brenk: structural alert [15]; <sup>i</sup>Lead-likeness: 250 < MW < 350, XLOGP3 < 3.5, num. rotatable bonds < 7 [16]. One violation of a rule is allowed.

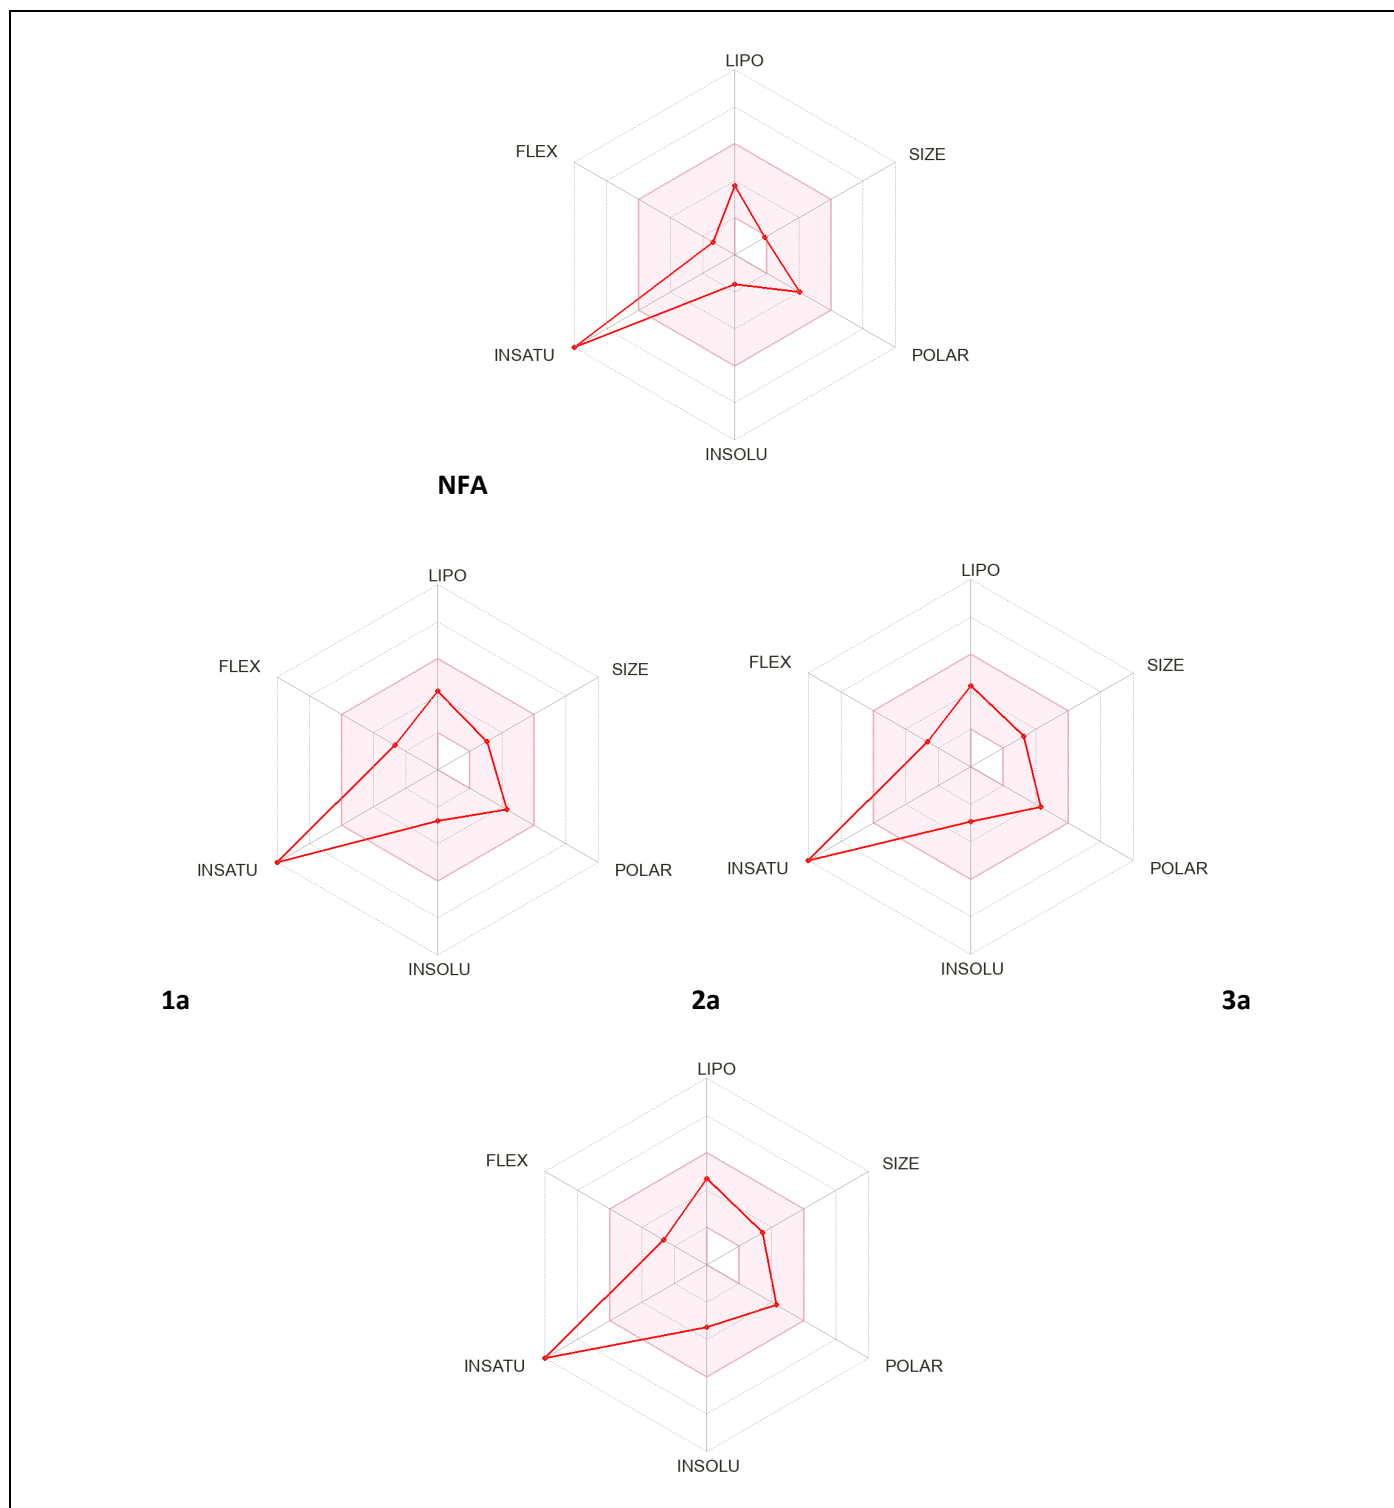

**Figure B1.** Bioavailability radar for nitrofuranylazines. The pink area represents the optimal range for lipophilicity (LIPO), size (SIZE), polarity (POLAR), solubility (INSOLU), saturation (INSATU) and flexibility (FLEX) and the red lines represent these parameters of the compound. Any deviation represents a suboptimal physicochemical property for oral bioavailability.



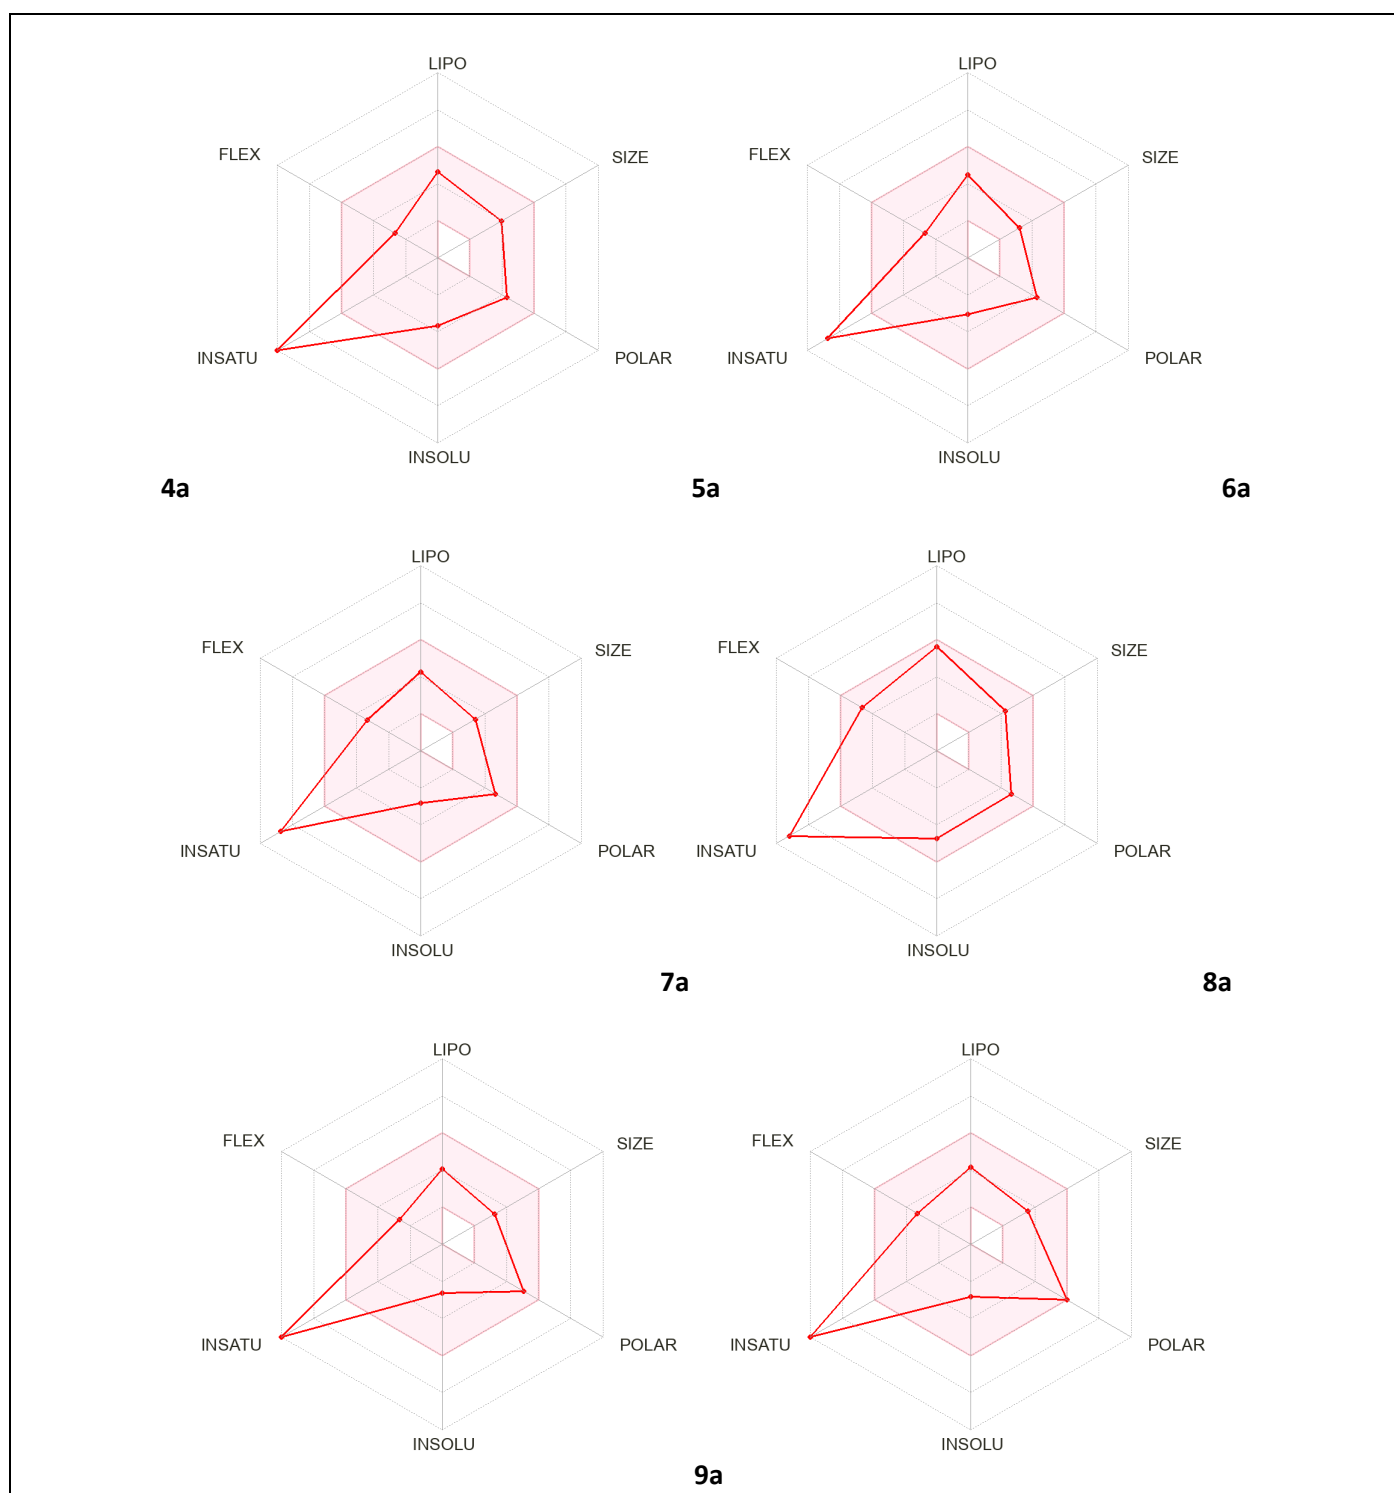

**Figure B1 (continued).** Bioavailability radar for nitrofuranylazines. The pink area represents the optimal range for lipophilicity (LIPO), size (SIZE), polarity (POLAR), solubility (INSOLU), saturation (INSATU) and flexibility (FLEX) and the red lines represent these parameters of the compound. Any deviation represents a suboptimal physicochemical property for oral bioavailability.

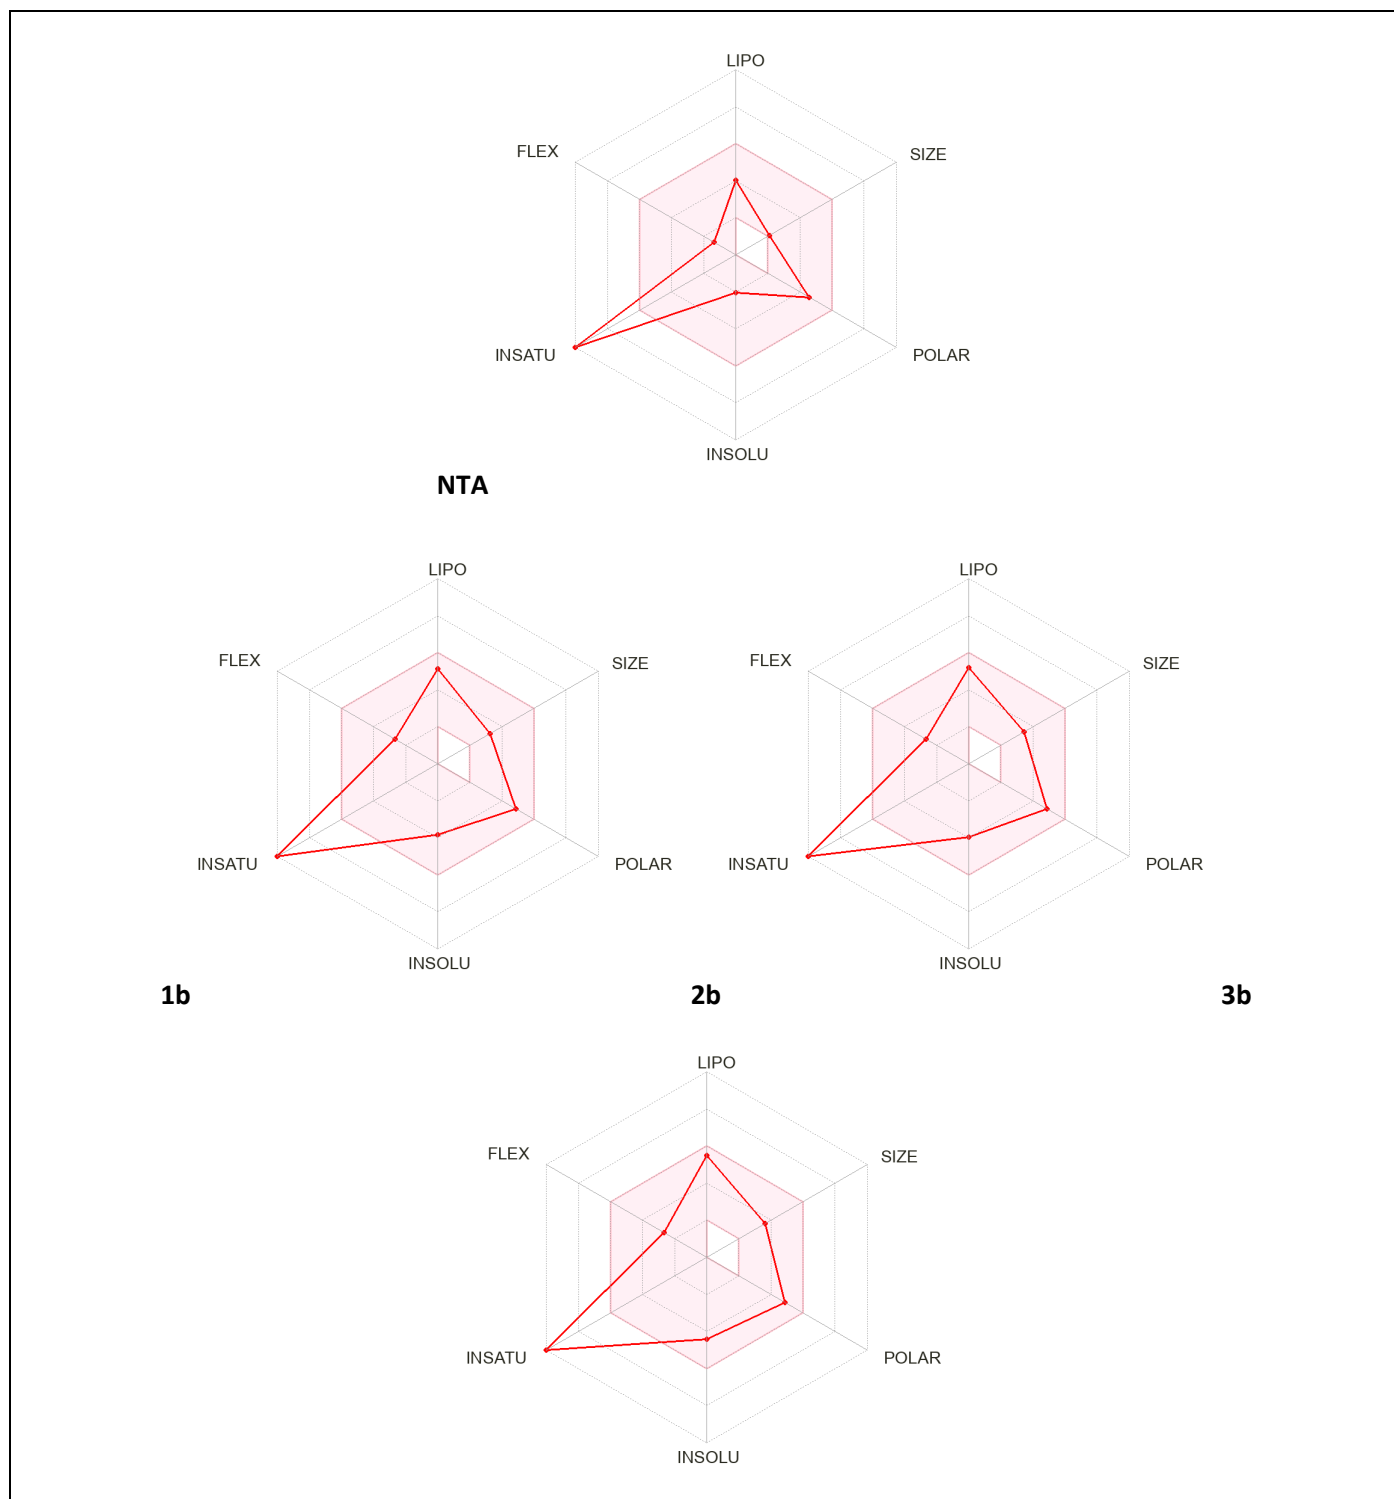

**Figure B1 (continued).** Bioavailability radar for nitrofuranylazines. The pink area represents the optimal range for lipophilicity (LIPO), size (SIZE), polarity (POLAR), solubility (INSOLU), saturation (INSATU) and flexibility (FLEX) and the red lines represent these parameters of the compound. Any deviation represents a suboptimal physicochemical property for oral bioavailability.

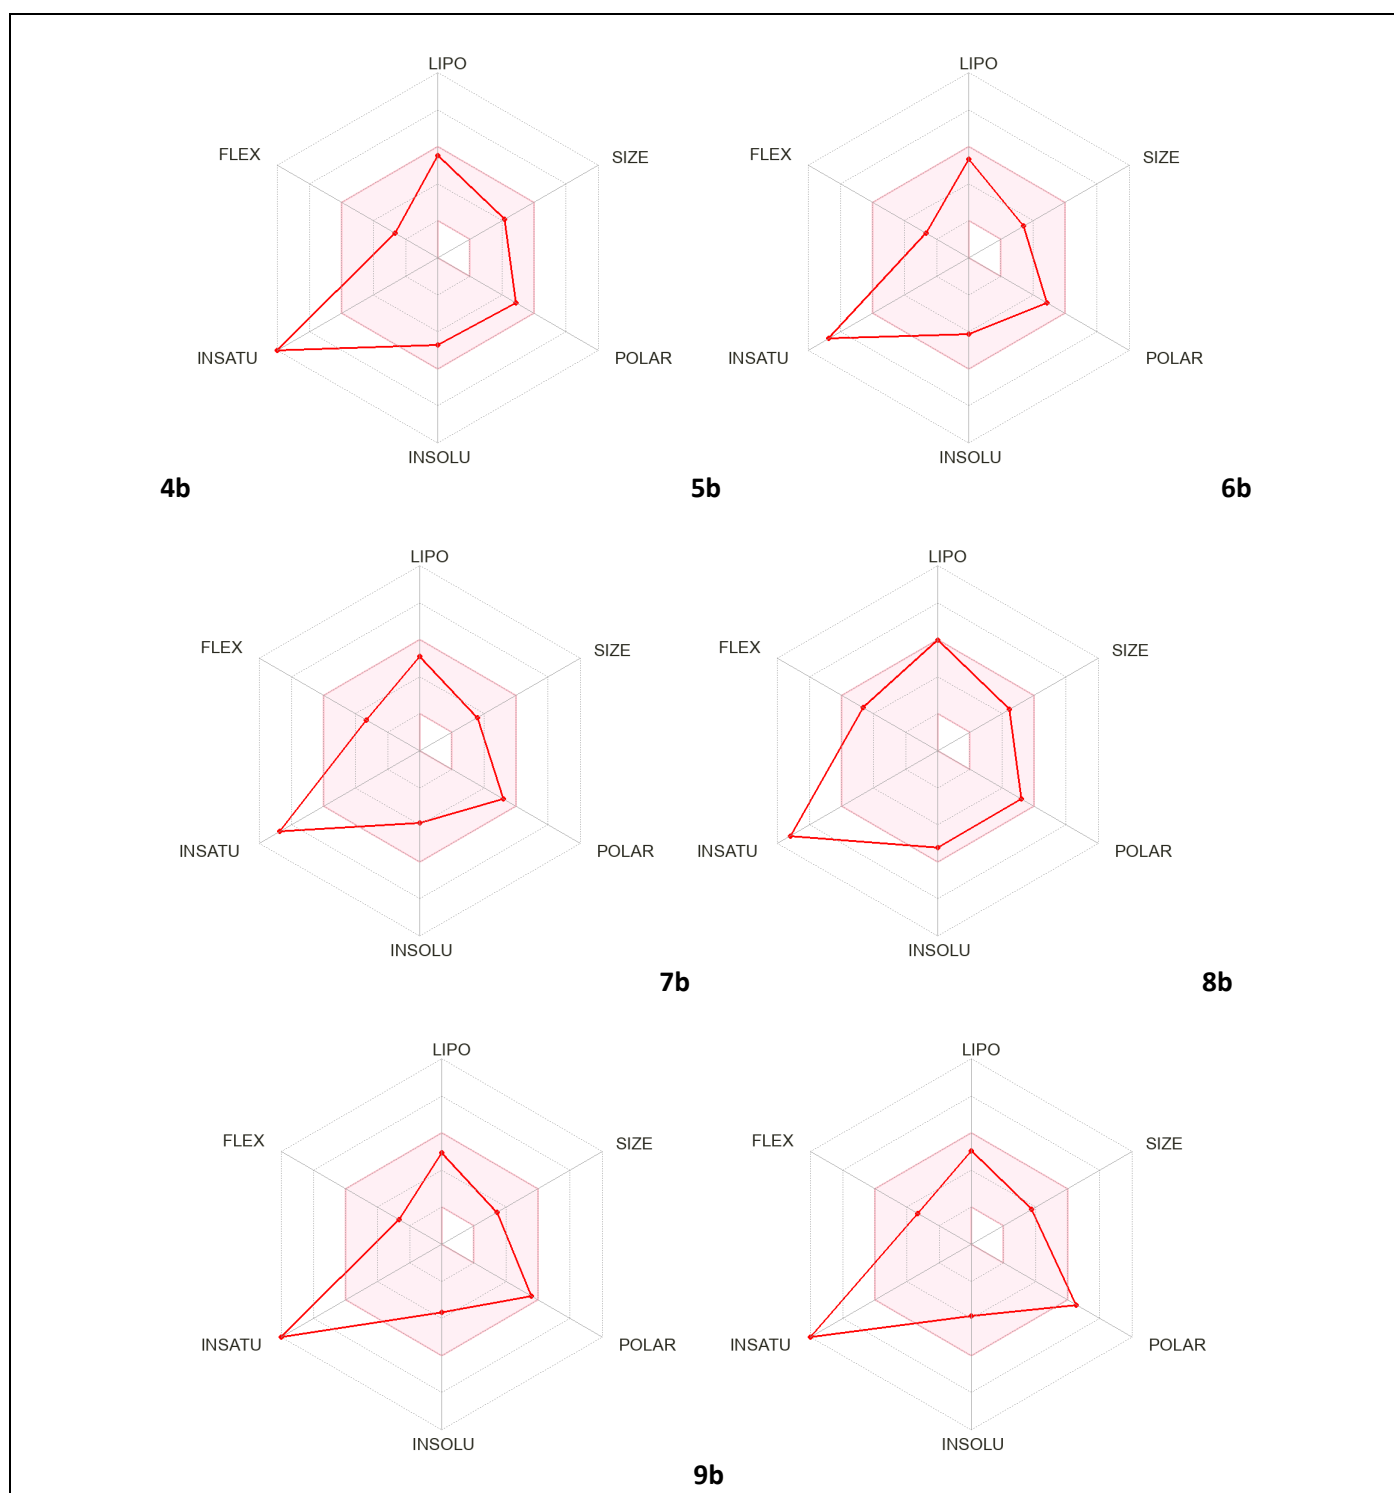

**Figure B1 (continued).** Bioavailability radar for nitrofuranylazines. The pink area represents the optimal range for lipophilicity (LIPO), size (SIZE), polarity (POLAR), solubility (INSOLU), saturation (INSATU) and flexibility (FLEX) and the red lines represent these parameters of the compound. Any deviation represents a suboptimal physicochemical property for oral bioavailability.

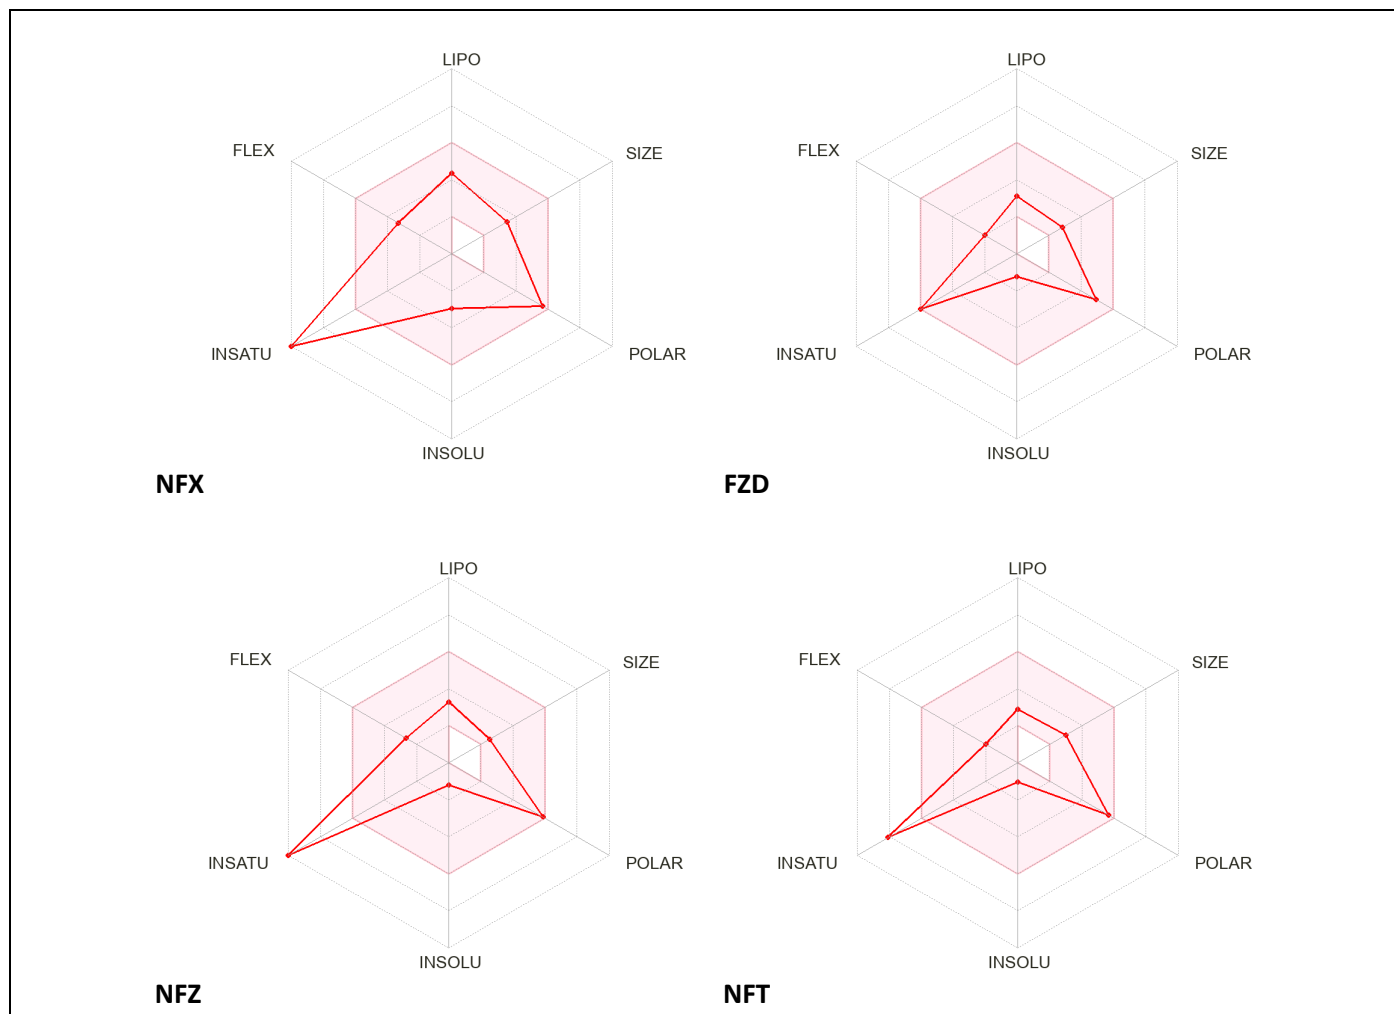

**Figure B1 (continued).** Bioavailability radar for nitrofuranylazines. The pink area represents the optimal range for lipophilicity (LIPO), size (SIZE), polarity (POLAR), solubility (INSOLU), saturation (INSATU) and flexibility (FLEX) and the red lines represent these parameters of the compound. Any deviation represents a suboptimal physicochemical property for oral bioavailability.

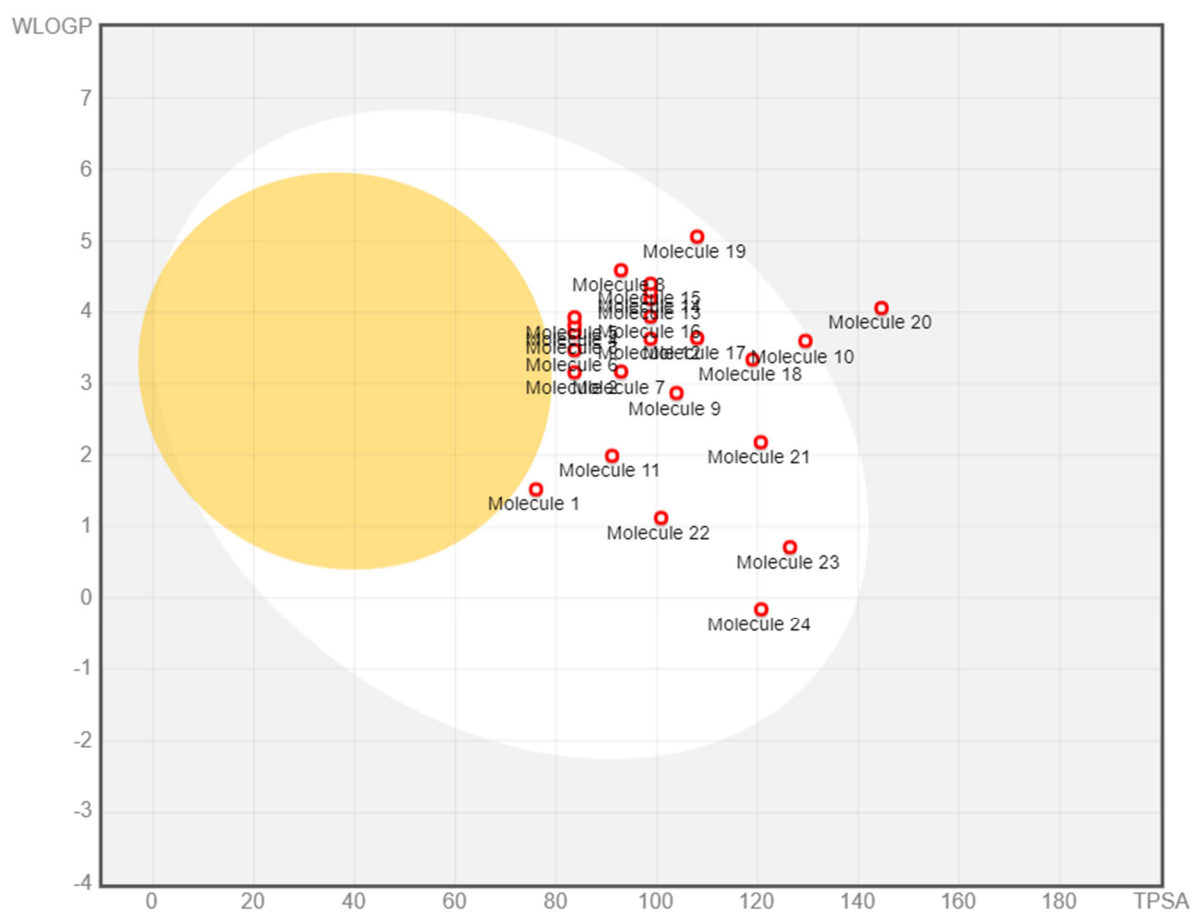

**Figure B2.** Nitrofuranylazines which are not substrates for Pgp (PGP-) are represented by the red circles. The white region is for high probability of passive absorption by the gastrointestinal tract (HIA), and the yellow region (yolk) is for high probability of brain penetration (BBB). White and yellow (yolk) regions are not mutually exclusive.

## ARTICLE

## References

1. Daina, A., O. Michielin, and V. Zoete, *SwissADME: a free web tool to evaluate pharmacokinetics, drug-likeness and medicinal chemistry friendliness of small molecules*. Scientific reports, 2017. **7**(1): p. 42717.
2. Ertl, P., B. Rohde, and P. Selzer, *Fast calculation of molecular polar surface area as a sum of fragment-based contributions and its application to the prediction of drug transport properties*. Journal of medicinal chemistry, 2000. **43**(20): p. 3714-3717.
3. Moriguchi, I., et al., *Simple method of calculating octanol/water partition coefficient*. Chemical and pharmaceutical bulletin, 1992. **40**(1): p. 127-130.
4. Moriguchi, I., et al., *Comparison of reliability of log P values for drugs calculated by several methods*. Chemical and pharmaceutical bulletin, 1994. **42**(4): p. 976-978.
5. Lipinski, C., et al., *Experimental and computational approach to estimate solubility and permeability in drug discovery and development setting*. Adv Drug Deliver Rev, 2001. **1**: p. 3-26.
6. Delaney, J.S., *ESOL: estimating aqueous solubility directly from molecular structure*. Journal of chemical information and computer sciences, 2004. **44**(3): p. 1000-1005.
7. Ali, J., et al., *Revisiting the general solubility equation: in silico prediction of aqueous solubility incorporating the effect of topographical polar surface area*. Journal of chemical information and modeling, 2012. **52**(2): p. 420-428.
8. Lipinski, C.A., et al., *Experimental and computational approaches to estimate solubility and permeability in drug discovery and development settings*. Advanced drug delivery reviews, 1997. **23**(1-3): p. 3-25.
9. Ghose, A.K., V.N. Viswanadhan, and J.J. Wendoloski, *A knowledge-based approach in designing combinatorial or medicinal chemistry libraries for drug discovery. 1. A qualitative and quantitative characterization of known drug databases*. Journal of combinatorial chemistry, 1999. **1**(1): p. 55-68.
10. Veber, D.F., et al., *Molecular properties that influence the oral bioavailability of drug candidates*. Journal of medicinal chemistry, 2002. **45**(12): p. 2615-2623.
11. Egan, W.J., K.M. Merz, and J.J. Baldwin, *Prediction of drug absorption using multivariate statistics*. Journal of medicinal chemistry, 2000. **43**(21): p. 3867-3877.
12. Muegge, I., S.L. Heald, and D. Brittelli, *Simple selection criteria for drug-like chemical matter*. Journal of medicinal chemistry, 2001. **44**(12): p. 1841-1846.
13. Martin, Y.C., *A bioavailability score*. Journal of medicinal chemistry, 2005. **48**(9): p. 3164-3170.
14. Baell, J.B. and G.A. Holloway, *New substructure filters for removal of pan assay interference compounds (PAINS) from screening libraries and for their exclusion in bioassays*. Journal of medicinal chemistry, 2010. **53**(7): p. 2719-2740.
15. Brenk, R., et al., *Lessons learnt from assembling screening libraries for drug discovery for neglected diseases*. ChemMedChem: Chemistry Enabling Drug Discovery, 2008. **3**(3): p. 435-444.
16. Teague, S.J., et al., *The design of leadlike combinatorial libraries*. Angewandte Chemie International Edition, 1999. **38**(24): p. 3743-3748.
